# Supplementary material for: Transcriptomic encoding of sensorimotor transformation in the midbrain
Source: eLife. 2021 Jul 28;10:e69825. doi: 10.7554/eLife.69825 (PMC8341986; doi:10.7554/eLife.69825)
Supplement: Supplementary file 1. [file elife-69825-supp1.xlsx]

## Sheet: mouse_10x_sample_info
Table S1. Mouse sample information for single-nuclei RNA-sequencing (snRNA-seq) for superior colliculus (SC)
	replicate 1	replicate 2	Total number of cells
mouse line	C57 BL/6N	C57 BL/6N
age	p56	p56
gender	Male	Male
sequenced cells	10607	7372	17979
filtered cells	8782	6110	14892

## Sheet: major_celltype_DEGs
Table S1: Top50 Differentially expressed genes among 9 major cell types in SC
	p_val	avg_logFC	pct.1	pct.2	p_val_adj	cluster	gene
1	0	2.07181	0.951	0.113	0	Excitatory neuron	Cacna2d1
2	0	1.52042	0.655	0.088	0	Excitatory neuron	Ebf1
3	0	1.3012	0.703	0.165	0	Excitatory neuron	Hs3st4
4	0	1.28032	0.937	0.517	0	Excitatory neuron	Kcnip4
5	0	1.2745	0.816	0.323	0	Excitatory neuron	Fam19a1
6	0	1.2727	0.61	0.218	0	Excitatory neuron	Gm28928
7	0	1.27042	0.715	0.227	0	Excitatory neuron	Kcnq5
8	0	1.17429	0.933	0.379	0	Excitatory neuron	Rmst
9	0	1.16053	0.965	0.549	0	Excitatory neuron	Asic2
10	0	1.09831	0.703	0.211	0	Excitatory neuron	Alk
11	0	1.08334	0.87	0.316	0	Excitatory neuron	Fam19a2
12	0	1.08329	0.888	0.324	0	Excitatory neuron	Kcnh7
13	0	1.07795	0.895	0.327	0	Excitatory neuron	Kcnc2
14	0	1.07382	0.983	0.507	0	Excitatory neuron	Dpp6
15	0	1.05815	0.988	0.628	0	Excitatory neuron	Tenm2
16	0	1.02224	0.571	0.108	0	Excitatory neuron	Cntnap5c
17	0	1.02219	0.979	0.487	0	Excitatory neuron	Lingo2
18	0	1.01978	0.901	0.343	0	Excitatory neuron	Unc5d
19	0	1.01366	0.809	0.297	0	Excitatory neuron	Cdh13
20	0	1.00783	0.984	0.531	0	Excitatory neuron	Rbfox1
21	0	1.00356	0.843	0.253	0	Excitatory neuron	Pdzrn4
22	0	0.991602	0.911	0.379	0	Excitatory neuron	Kcnb2
23	0	0.988446	0.906	0.284	0	Excitatory neuron	A230006K03Rik
24	0	0.975987	0.949	0.492	0	Excitatory neuron	Sgcz
25	0	0.964277	0.792	0.272	0	Excitatory neuron	Chrm3
26	0	0.960389	0.969	0.432	0	Excitatory neuron	Gabrb3
27	0	0.951617	0.904	0.366	0	Excitatory neuron	Cntnap5a
28	0	0.945056	0.766	0.313	0	Excitatory neuron	Rbms3
29	0	0.942232	0.504	0.153	0	Excitatory neuron	Col25a1
30	0	0.940993	0.969	0.41	0	Excitatory neuron	Myt1l
31	0	0.940877	0.727	0.237	0	Excitatory neuron	C130073E24Rik
32	0	0.939223	0.991	0.513	0	Excitatory neuron	Nrg3
33	0	0.927695	0.8	0.278	0	Excitatory neuron	Grm1
34	0	0.925075	0.898	0.453	0	Excitatory neuron	Car10
35	0	0.923981	0.97	0.476	0	Excitatory neuron	Ptprn2
36	0	0.922464	0.712	0.211	0	Excitatory neuron	Fstl5
37	0	0.918986	0.607	0.17	0	Excitatory neuron	4930555F03Rik
38	0	0.916994	0.925	0.406	0	Excitatory neuron	Dpp10
39	0	0.915826	0.973	0.44	0	Excitatory neuron	Lrfn5
40	0	0.915539	0.703	0.067	0	Excitatory neuron	Slc17a6
41	0	0.915263	0.373	0.009	0	Excitatory neuron	Ebf2
42	0	0.91406	0.909	0.374	0	Excitatory neuron	Pcsk2
43	0	0.908474	0.838	0.308	0	Excitatory neuron	Cntnap5b
44	0	0.897851	0.351	0.026	0	Excitatory neuron	Bnc2
45	0	0.896312	0.795	0.201	0	Excitatory neuron	D430041D05Rik
46	0	0.895122	0.711	0.262	0	Excitatory neuron	Hcn1
47	0	0.887674	0.696	0.244	0	Excitatory neuron	Hs6st3
48	0	0.885847	0.953	0.408	0	Excitatory neuron	Tenm4
49	0	0.881183	0.994	0.54	0	Excitatory neuron	Cntnap2
50	0	0.879777	0.996	0.812	0	Excitatory neuron	Meg3
51	0	1.92835	0.999	0.599	0	Inhibitory neuron	Nrxn3
52	0	1.85083	0.667	0.066	0	Inhibitory neuron	Otx2os1
53	0	1.44641	0.507	0.179	0	Inhibitory neuron	Il1rapl2
54	0	1.43469	0.885	0.368	0	Inhibitory neuron	Zfpm2
55	0	1.42922	0.861	0.105	0	Inhibitory neuron	Gad2
56	0	1.32088	0.562	0.228	0	Inhibitory neuron	Nxph1
57	0	1.30883	0.614	0.28	0	Inhibitory neuron	Adarb2
58	0	1.28325	0.949	0.574	0	Inhibitory neuron	Nrg1
59	0	1.20274	0.667	0.128	0	Inhibitory neuron	Kcnmb2
60	0	1.19756	0.678	0.234	0	Inhibitory neuron	Pdzd2
61	0	1.14714	0.74	0.077	0	Inhibitory neuron	Gad1
62	0	1.14412	0.938	0.379	0	Inhibitory neuron	Rab3c
63	0	1.11118	0.894	0.352	0	Inhibitory neuron	Etl4
64	2.73968e-300	1.06364	0.552	0.254	6.32208e-296	Inhibitory neuron	Pcbp3
65	0	1.04439	0.82	0.319	0	Inhibitory neuron	Cdh12
66	0	1.04209	0.896	0.476	0	Inhibitory neuron	Grip1
67	0	1.02473	0.802	0.39	0	Inhibitory neuron	Grm8
68	0	1.02001	0.69	0.233	0	Inhibitory neuron	Zmat4
69	0	1.00625	0.737	0.311	0	Inhibitory neuron	Thsd7b
70	0	0.983095	0.97	0.502	0	Inhibitory neuron	Syt1
71	0	0.980584	0.938	0.416	0	Inhibitory neuron	Robo2
72	0	0.972138	0.845	0.442	0	Inhibitory neuron	Hdac9
73	0	0.958679	0.948	0.47	0	Inhibitory neuron	Galntl6
74	0	0.940595	0.909	0.451	0	Inhibitory neuron	Cdh18
75	0	0.922789	0.766	0.317	0	Inhibitory neuron	Kcnip1
76	0	0.920965	0.996	0.503	0	Inhibitory neuron	Dscam
77	0	0.914127	0.757	0.438	0	Inhibitory neuron	Zfhx3
78	0	0.911265	0.907	0.441	0	Inhibitory neuron	Pde10a
79	0	0.904075	0.746	0.338	0	Inhibitory neuron	Nyap2
80	0	0.892679	0.78	0.372	0	Inhibitory neuron	Nkain3
81	0	0.876303	0.565	0.187	0	Inhibitory neuron	Fstl4
82	0	0.861679	0.968	0.646	0	Inhibitory neuron	Astn2
83	0	0.860344	0.536	0.217	0	Inhibitory neuron	Foxp2
84	0	0.84493	0.827	0.382	0	Inhibitory neuron	Cep112
85	0	0.833877	1	0.82	0	Inhibitory neuron	Snhg11
86	0	0.825711	1	0.829	0	Inhibitory neuron	Meg3
87	0	0.820839	0.998	0.585	0	Inhibitory neuron	Cntnap2
88	0	0.817243	0.909	0.5	0	Inhibitory neuron	Tenm3
89	0	0.8163	0.966	0.529	0	Inhibitory neuron	Snap25
90	0	0.810025	0.548	0.19	0	Inhibitory neuron	Trhde
91	0	0.806614	0.68	0.254	0	Inhibitory neuron	Chrm2
92	0	0.802048	0.469	0.133	0	Inhibitory neuron	Slc44a5
93	1.07029e-296	0.797386	0.682	0.358	2.4698e-292	Inhibitory neuron	Egfem1
94	0	0.794062	0.924	0.429	0	Inhibitory neuron	Celf4
95	0	0.77909	0.707	0.272	0	Inhibitory neuron	Zfhx4
96	0	0.765193	0.813	0.388	0	Inhibitory neuron	Ptchd4
97	0	0.760853	0.877	0.438	0	Inhibitory neuron	Cntn5
98	0	0.75587	0.731	0.305	0	Inhibitory neuron	Gm26905
99	0	0.753851	0.996	0.544	0	Inhibitory neuron	Fam155a
100	0	0.749289	0.861	0.449	0	Inhibitory neuron	Cntn4
101	0	3.29109	0.996	0.202	0	Astrocyte	Slc4a4
102	0	2.94995	0.99	0.215	0	Astrocyte	Slc1a2
103	0	2.78536	0.985	0.241	0	Astrocyte	Gm3764
104	0	2.6999	0.955	0.053	0	Astrocyte	Nhsl1
105	0	2.65376	0.977	0.125	0	Astrocyte	Atp1a2
106	0	2.48737	0.996	0.485	0	Astrocyte	Pitpnc1
107	0	2.44247	0.971	0.398	0	Astrocyte	Gpc5
108	0	2.43535	0.947	0.11	0	Astrocyte	Slc6a11
109	0	2.2005	0.936	0.157	0	Astrocyte	Plpp3
110	0	2.13709	0.972	0.355	0	Astrocyte	Sparcl1
111	0	2.13074	0.824	0.019	0	Astrocyte	Etnppl
112	0	2.03143	0.877	0.098	0	Astrocyte	Lrig1
113	0	2.01583	0.889	0.091	0	Astrocyte	Plce1
114	0	2.00313	0.913	0.18	0	Astrocyte	Mapk4
115	0	1.99481	0.993	0.662	0	Astrocyte	Plcb1
116	0	1.98581	0.987	0.663	0	Astrocyte	Trpm3
117	0	1.96396	0.862	0.028	0	Astrocyte	Fgfr3
118	0	1.94129	0.864	0.1	0	Astrocyte	Slc1a3
119	0	1.92578	0.857	0.46	0	Astrocyte	Apoe
120	0	1.92325	0.812	0.057	0	Astrocyte	F3
121	0	1.9057	0.744	0.061	0	Astrocyte	Aldh1a1
122	0	1.8978	0.865	0.114	0	Astrocyte	Slc39a12
123	0	1.87342	0.99	0.616	0	Astrocyte	Luzp2
124	0	1.86655	0.895	0.192	0	Astrocyte	Paqr8
125	0	1.863	0.787	0.044	0	Astrocyte	Phkg1
126	0	1.86068	0.975	0.318	0	Astrocyte	Ptprz1
127	0	1.82825	0.839	0.07	0	Astrocyte	Kank1
128	0	1.82601	0.877	0.252	0	Astrocyte	Ptch1
129	0	1.8123	0.912	0.066	0	Astrocyte	Mertk
130	0	1.80898	0.873	0.15	0	Astrocyte	Ndrg2
131	0	1.7912	0.972	0.51	0	Astrocyte	Farp1
132	0	1.77968	0.831	0.117	0	Astrocyte	Nwd1
133	0	1.77549	0.884	0.252	0	Astrocyte	Prex2
134	0	1.77253	0.751	0.28	0	Astrocyte	Wdr17
135	0	1.75484	0.971	0.619	0	Astrocyte	Cpe
136	0	1.71863	0.997	0.669	0	Astrocyte	Npas3
137	0	1.70889	0.758	0.019	0	Astrocyte	Acsbg1
138	0	1.70647	0.926	0.421	0	Astrocyte	Camk2g
139	0	1.7053	0.773	0.038	0	Astrocyte	Ntsr2
140	0	1.70337	0.757	0.018	0	Astrocyte	Atp13a4
141	0	1.7008	0.938	0.414	0	Astrocyte	Ttyh1
142	0	1.69913	0.787	0.128	0	Astrocyte	Nxn
143	0	1.69382	0.881	0.26	0	Astrocyte	Lhfp
144	0	1.6924	0.865	0.284	0	Astrocyte	Phka1
145	0	1.67191	0.722	0.042	0	Astrocyte	Bmpr1b
146	0	1.64914	0.985	0.392	0	Astrocyte	Nfia
147	0	1.64726	0.994	0.731	0	Astrocyte	Msi2
148	0	1.62106	0.972	0.561	0	Astrocyte	Trps1
149	0	1.6178	0.85	0.229	0	Astrocyte	Bcan
150	0	1.61155	0.731	0.027	0	Astrocyte	Slc7a10
151	0	3.45009	0.997	0.276	0	Oligodendrocyte	Mbp
152	0	3.26405	0.992	0.473	0	Oligodendrocyte	Plp1
153	0	3.16663	0.959	0.027	0	Oligodendrocyte	Prr5l
154	0	3.16036	0.968	0.052	0	Oligodendrocyte	St18
155	0	2.95774	0.966	0.132	0	Oligodendrocyte	Mobp
156	0	2.66019	0.953	0.11	0	Oligodendrocyte	Mag
157	0	2.63047	0.969	0.363	0	Oligodendrocyte	St6galnac3
158	0	2.57741	0.933	0.096	0	Oligodendrocyte	Mog
159	0	2.55927	0.977	0.498	0	Oligodendrocyte	Pex5l
160	0	2.52334	0.978	0.6	0	Oligodendrocyte	Slc24a2
161	0	2.48345	0.939	0.13	0	Oligodendrocyte	Mast3
162	0	2.48129	0.995	0.575	0	Oligodendrocyte	Plcl1
163	0	2.3598	0.892	0.143	0	Oligodendrocyte	Neat1
164	0	2.35854	0.948	0.23	0	Oligodendrocyte	Enpp2
165	0	2.35459	0.757	0.107	0	Oligodendrocyte	Mal
166	0	2.33906	0.977	0.421	0	Oligodendrocyte	Dock10
167	0	2.31887	0.975	0.463	0	Oligodendrocyte	Map7
168	0	2.26397	0.999	0.819	0	Oligodendrocyte	Pde4b
169	0	2.25458	0.773	0.163	0	Oligodendrocyte	Ptgds
170	0	2.25341	0.871	0.292	0	Oligodendrocyte	Rnf220
171	0	2.24546	0.847	0.051	0	Oligodendrocyte	Aspa
172	0	2.23456	0.961	0.308	0	Oligodendrocyte	Zfp536
173	0	2.19945	0.891	0.288	0	Oligodendrocyte	Adipor2
174	0	2.19358	0.899	0.065	0	Oligodendrocyte	Gjc3
175	0	2.15556	0.828	0.016	0	Oligodendrocyte	Sec14l5
176	0	2.14695	0.869	0.061	0	Oligodendrocyte	Bcas1
177	0	2.13372	0.95	0.344	0	Oligodendrocyte	Arhgap23
178	0	2.12469	0.98	0.554	0	Oligodendrocyte	Edil3
179	0	2.10351	0.887	0.71	0	Oligodendrocyte	Fth1
180	0	2.10336	0.845	0.171	0	Oligodendrocyte	Gm16168
181	0	2.08644	0.768	0.012	0	Oligodendrocyte	Gm4593
182	0	2.0787	0.778	0.095	0	Oligodendrocyte	Cldn11
183	0	2.07438	0.919	0.287	0	Oligodendrocyte	Tubb4a
184	0	2.05322	0.817	0.146	0	Oligodendrocyte	Tspan2
185	0	2.03302	0.779	0.192	0	Oligodendrocyte	Car2
186	0	2.01586	0.887	0.173	0	Oligodendrocyte	Phldb1
187	0	2.01139	0.799	0.068	0	Oligodendrocyte	Pde8a
188	0	1.99629	0.853	0.22	0	Oligodendrocyte	4930419G24Rik
189	0	1.98486	0.909	0.357	0	Oligodendrocyte	Ppp1r16b
190	0	1.98323	0.974	0.761	0	Oligodendrocyte	Mast4
191	0	1.98228	0.991	0.695	0	Oligodendrocyte	Tmeff2
192	0	1.98064	0.808	0.039	0	Oligodendrocyte	Fa2h
193	0	1.95974	0.676	0.191	0	Oligodendrocyte	Cnp
194	0	1.91835	0.687	0.047	0	Oligodendrocyte	Hapln2
195	0	1.89848	0.794	0.077	0	Oligodendrocyte	Plekhh1
196	0	1.87976	0.886	0.397	0	Oligodendrocyte	Pacrg
197	0	1.87552	0.775	0.076	0	Oligodendrocyte	Ugt8a
198	0	1.87155	0.823	0.204	0	Oligodendrocyte	Clmn
199	0	1.82167	0.983	0.685	0	Oligodendrocyte	Phlpp1
200	0	1.82147	0.691	0.155	0	Oligodendrocyte	Apod
201	0	2.62057	0.969	0.041	0	OPC	Vcan
202	3.25159e-286	2.58281	0.991	0.361	7.50336e-282	OPC	Xylt1
203	0	2.53674	0.94	0.009	0	OPC	Pdgfra
204	2.45894e-236	2.4257	0.991	0.53	5.67425e-232	OPC	Tnr
205	0	2.39027	0.923	0.069	0	OPC	Itga9
206	0	2.2448	0.955	0.138	0	OPC	Cacng4
207	4.09839e-232	2.14141	0.994	0.56	9.45744e-228	OPC	Lhfpl3
208	9.86011e-234	2.07522	0.997	0.536	2.27532e-229	OPC	Epn2
209	0	2.05623	0.96	0.122	0	OPC	Megf11
210	0	2.00611	0.909	0.068	0	OPC	Ppfibp1
211	0	1.99596	0.844	0.078	0	OPC	Gm38505
212	0	1.9498	0.901	0.163	0	OPC	Gm4876
213	0	1.93949	0.957	0.151	0	OPC	Arhgap31
214	9.29315e-265	1.93115	0.949	0.313	2.14449e-260	OPC	Chst11
215	7.49933e-255	1.84508	0.977	0.294	1.73055e-250	OPC	Nxph1
216	3.37143e-293	1.84329	0.991	0.268	7.77991e-289	OPC	Sox6
217	1.40637e-267	1.78439	0.895	0.237	3.24534e-263	OPC	Kcnip3
218	0	1.7688	0.801	0.009	0	OPC	Neu4
219	6.52234e-193	1.73742	0.929	0.438	1.5051e-188	OPC	Cspg5
220	2.37592e-289	1.6973	0.898	0.21	5.48267e-285	OPC	Mir9-3hg
221	5.85556e-248	1.67706	0.966	0.302	1.35123e-243	OPC	Sox5
222	2.23713e-217	1.65957	0.986	0.4	5.16241e-213	OPC	Ptprz1
223	5.43541e-222	1.65709	0.98	0.347	1.25427e-217	OPC	Adarb2
224	2.76357e-202	1.60658	0.991	0.549	6.37722e-198	OPC	Slc35f1
225	0	1.60537	0.753	0.014	0	OPC	Cspg4
226	0	1.59433	0.773	0.057	0	OPC	Sema3d
227	1.55774e-281	1.5804	0.923	0.212	3.59463e-277	OPC	Tmem132d
228	2.06749e-206	1.57017	0.997	0.615	4.77095e-202	OPC	Dscam
229	4.41248e-220	1.56792	0.912	0.296	1.01822e-215	OPC	Dpyd
230	0	1.54381	0.707	0.017	0	OPC	Emid1
231	0	1.52813	0.739	0.064	0	OPC	Adam12
232	8.94254e-244	1.51345	0.918	0.245	2.06358e-239	OPC	Spon1
233	4.90753e-166	1.50339	0.943	0.508	1.13246e-161	OPC	Mmp16
234	5.50424e-184	1.43541	0.994	0.6	1.27016e-179	OPC	Pcdh15
235	1.01175e-276	1.42434	0.773	0.155	2.33472e-272	OPC	Myt1
236	3.75529e-270	1.40355	0.759	0.144	8.66571e-266	OPC	Kcnh8
237	0	1.39834	0.722	0.069	0	OPC	Stk32a
238	0	1.3921	0.69	0.04	0	OPC	Matn4
239	5.19961e-153	1.38027	0.969	0.664	1.19986e-148	OPC	Zeb1
240	2.37939e-195	1.37962	0.994	0.76	5.49069e-191	OPC	Anks1b
241	0	1.37787	0.71	0.074	0	OPC	Sema5b
242	0	1.37122	0.645	0.044	0	OPC	Rgcc
243	1.19882e-179	1.36171	0.744	0.216	2.76639e-175	OPC	Abhd2
244	1.89259e-153	1.32754	0.895	0.47	4.36734e-149	OPC	Usp24
245	2.73726e-178	1.3176	0.866	0.301	6.3165e-174	OPC	Nckap5
246	1.1421e-149	1.31544	0.969	0.616	2.6355e-145	OPC	Brinp3
247	3.34071e-153	1.30935	0.938	0.625	7.70903e-149	OPC	Nrxn2
248	0	1.3027	0.648	0.03	0	OPC	Ntn1
249	0	1.28976	0.642	0.028	0	OPC	Afap1l2
250	2.25127e-187	1.2813	0.733	0.172	5.19503e-183	OPC	Abtb2
251	0	3.29041	0.962	0.007	0	Microglia	Inpp5d
252	0	2.99019	0.945	0.133	0	Microglia	Tgfbr1
253	0	2.81087	0.89	0.012	0	Microglia	Selplg
254	0	2.7733	0.872	0.007	0	Microglia	Ly86
255	0	2.74918	0.924	0.11	0	Microglia	Hexb
256	0	2.73973	0.907	0.003	0	Microglia	Arhgap45
257	0	2.63504	0.703	0.017	0	Microglia	C1qa
258	0	2.59909	0.872	0.027	0	Microglia	Apbb1ip
259	0	2.59899	0.855	0.01	0	Microglia	Csf1r
260	0	2.54775	0.793	0.005	0	Microglia	Runx1
261	0	2.53376	0.814	0.005	0	Microglia	Ikzf1
262	0	2.53301	0.834	0.088	0	Microglia	Cx3cr1
263	0	2.53154	0.821	0.007	0	Microglia	Slco2b1
264	0	2.52917	0.841	0.026	0	Microglia	Dock8
265	0	2.52701	0.838	0.058	0	Microglia	Fyb
266	0	2.48796	0.855	0.057	0	Microglia	Itgb5
267	1.97478e-204	2.42599	0.934	0.359	4.55701e-200	Microglia	Pag1
268	0	2.37605	0.652	0.015	0	Microglia	C1qb
269	1.34652e-180	2.37079	0.972	0.584	3.10722e-176	Microglia	Srgap2
270	0	2.34182	0.734	0.013	0	Microglia	Ctss
271	2.23772e-101	2.33691	0.8	0.432	5.16376e-97	Microglia	Cst3
272	3.76937e-262	2.3301	0.91	0.219	8.6982e-258	Microglia	Epb41l2
273	0	2.31387	0.776	0.008	0	Microglia	Adap2
274	0	2.31154	0.731	0.008	0	Microglia	C1qc
275	1.86423e-209	2.2688	0.886	0.279	4.30189e-205	Microglia	Lyn
276	0	2.2342	0.793	0.044	0	Microglia	Entpd1
277	8.84542e-195	2.22496	0.876	0.297	2.04117e-190	Microglia	Pde3b
278	0	2.2224	0.845	0.139	0	Microglia	Rreb1
279	0	2.2203	0.745	0.006	0	Microglia	Csf3r
280	2.40968e-244	2.20631	0.845	0.183	5.56058e-240	Microglia	Ccnd3
281	0	2.20588	0.955	0.175	0	Microglia	Mertk
282	0	2.19759	0.731	0.002	0	Microglia	Siglech
283	0	2.13747	0.697	0.003	0	Microglia	Fgd2
284	0	2.13501	0.745	0.045	0	Microglia	Lair1
285	4.81726e-175	2.11779	0.955	0.533	1.11163e-170	Microglia	Mef2a
286	9.0161e-160	2.11381	0.9	0.445	2.08056e-155	Microglia	Numb
287	0	2.11166	0.721	0.014	0	Microglia	Fli1
288	1.2262e-162	2.10363	0.966	0.681	2.82958e-158	Microglia	Plxdc2
289	2.32754e-158	2.0604	0.931	0.532	5.37103e-154	Microglia	Ldlrad4
290	5.58295e-205	2.05373	0.762	0.178	1.28832e-200	Microglia	Zfp710
291	8.12835e-173	2.04861	0.79	0.243	1.8757e-168	Microglia	P2ry12
292	0	2.0464	0.717	0.078	0	Microglia	Fam105a
293	1.79435e-191	2.03334	0.831	0.251	4.14064e-187	Microglia	Serinc3
294	0	2.03287	0.676	0.015	0	Microglia	Unc93b1
295	1.0395e-239	2.02594	0.728	0.132	2.39876e-235	Microglia	Dock2
296	2.75023e-184	2.02232	0.907	0.345	6.34643e-180	Microglia	Maml3
297	0	2.01461	0.645	0.011	0	Microglia	Myo1f
298	0	2.00457	0.707	0.034	0	Microglia	Cdh23
299	1.54651e-154	2.00212	0.862	0.361	3.56872e-150	Microglia	Mef2c
300	0	1.9778	0.662	0.013	0	Microglia	Cfh
301	0	3.86604	0.971	0.007	0	Endothelial	Flt1
302	0	3.51546	0.899	0.007	0	Endothelial	Slco1a4
303	0	3.24851	0.928	0.016	0	Endothelial	Mecom
304	0	2.87022	0.623	0.012	0	Endothelial	Ly6c1
305	1.7859e-189	2.81493	0.957	0.073	4.12114e-185	Endothelial	Atp10a
306	0	2.79287	0.884	0.004	0	Endothelial	Adgrl4
307	1.88e-100	2.79257	0.913	0.136	4.3383e-96	Endothelial	Slc2a1
308	1.39101e-28	2.74914	0.812	0.4	3.20989e-24	Endothelial	Bsg
309	1.70748e-44	2.59442	0.957	0.523	3.94017e-40	Endothelial	Sgms1
310	7.3863e-261	2.5818	0.841	0.038	1.70446e-256	Endothelial	Ptprb
311	6.47806e-39	2.53568	0.87	0.398	1.49488e-34	Endothelial	Gpcpd1
312	0	2.53209	0.725	0.007	0	Endothelial	Cldn5
313	0	2.50983	0.768	0.006	0	Endothelial	Klf2
314	0	2.44379	0.768	0.006	0	Endothelial	Cyyr1
315	3.17688e-40	2.4193	0.957	0.6	7.33097e-36	Endothelial	Igf1r
316	2.42586e-47	2.36778	0.942	0.37	5.59793e-43	Endothelial	Rundc3b
317	3.65975e-230	2.36099	0.855	0.045	8.44524e-226	Endothelial	Abcg2
318	6.56707e-262	2.33021	0.42	0.008	1.51542e-257	Endothelial	Il1r1
319	1.69034e-79	2.31724	0.855	0.144	3.90064e-75	Endothelial	Ccdc141
320	1.42556e-280	2.31015	0.739	0.026	3.28963e-276	Endothelial	Pltp
321	2.24068e-44	2.30602	0.986	0.672	5.17059e-40	Endothelial	Ptprg
322	9.19727e-169	2.26234	0.594	0.029	2.12236e-164	Endothelial	Igfbp7
323	4.7724e-114	2.24058	0.652	0.053	1.10128e-109	Endothelial	Slco1c1
324	5.40214e-89	2.23406	0.565	0.051	1.2466e-84	Endothelial	Ramp2
325	5.01221e-116	2.21988	0.812	0.085	1.15662e-111	Endothelial	Epas1
326	1.22372e-228	2.20982	0.797	0.039	2.82386e-224	Endothelial	Kank3
327	5.81782e-49	2.18302	0.812	0.217	1.34252e-44	Endothelial	Tbc1d4
328	0	2.1774	0.739	0.008	0	Endothelial	Abcb1a
329	0	2.15956	0.768	0.024	0	Endothelial	Fli1
330	0	2.14268	0.725	0.009	0	Endothelial	Paqr5
331	4.43061e-18	2.13915	0.203	0.029	1.02241e-13	Endothelial	Hba-a1
332	2.3403e-117	2.12578	0.768	0.074	5.40048e-113	Endothelial	Abcc4
333	0	2.09401	0.652	0.004	0	Endothelial	Nostrin
334	2.74743e-78	2.07792	0.609	0.068	6.33996e-74	Endothelial	Slc7a5
335	0	2.06309	0.594	0.007	0	Endothelial	Ly6a
336	1.11312e-19	2.01405	0.203	0.027	2.56863e-15	Endothelial	Vcam1
337	0	2.00538	0.681	0.013	0	Endothelial	Rbpms
338	5.78686e-140	1.99525	0.507	0.025	1.33538e-135	Endothelial	Id1
339	1.98579e-76	1.99424	0.913	0.167	4.58242e-72	Endothelial	Arhgap31
340	0	1.99019	0.638	0.008	0	Endothelial	Fn1
341	9.43266e-204	1.98566	0.623	0.026	2.17668e-199	Endothelial	Jcad
342	3.93707e-50	1.97104	0.942	0.318	9.08518e-46	Endothelial	Utrn
343	3.13059e-126	1.9699	0.261	0.007	7.22415e-122	Endothelial	Rgs5
344	7.58492e-62	1.95627	0.58	0.078	1.7503e-57	Endothelial	Pglyrp1
345	5.08246e-50	1.95421	0.928	0.267	1.17283e-45	Endothelial	Ebf1
346	4.42862e-96	1.94799	0.478	0.033	1.02195e-91	Endothelial	Itm2a
347	6.89444e-72	1.94796	0.667	0.089	1.59096e-67	Endothelial	Kitl
348	1.16059e-07	1.91522	0.116	0.022	0.00267817	Endothelial	Hba-a2
349	1.5928e-43	1.90908	0.551	0.096	3.67555e-39	Endothelial	Sema3c
350	4.20741e-41	1.90318	0.594	0.119	9.70903e-37	Endothelial	Polk
351	0	3.0706	0.771	0.022	0	Meninges	Slc6a20a
352	4.8093e-212	3.04215	0.624	0.039	1.10979e-207	Meninges	Ranbp3l
353	0	2.76763	0.688	0.032	0	Meninges	Bmp6
354	0	2.63419	0.853	0.034	0	Meninges	Cped1
355	1.05423e-10	2.57765	0.468	0.27	2.43274e-06	Meninges	Nnat
356	4.49773e-293	2.45296	0.706	0.035	1.0379e-288	Meninges	Colec12
357	1.34216e-86	2.36488	0.651	0.104	3.09716e-82	Meninges	Slc7a11
358	3.07184e-306	2.31297	0.55	0.019	7.08858e-302	Meninges	Lama1
359	2.20157e-32	2.28202	0.706	0.3	5.08035e-28	Meninges	Ptgds
360	3.76811e-129	2.23977	0.651	0.073	8.6953e-125	Meninges	Pdzrn3
361	2.37224e-87	2.22581	0.56	0.076	5.47418e-83	Meninges	Adam12
362	0	2.21836	0.624	0.005	0	Meninges	Slc6a13
363	3.03388e-109	2.20965	0.862	0.161	7.00097e-105	Meninges	9530026P05Rik
364	3.70877e-52	2.20745	0.55	0.12	8.55835e-48	Meninges	Fbxl7
365	3.74863e-18	2.07717	0.266	0.069	8.65035e-14	Meninges	Atp13a5
366	1.64414e-12	2.05621	0.771	0.71	3.79402e-08	Meninges	Trpm3
367	6.45663e-35	2.05396	0.486	0.128	1.48993e-30	Meninges	Bnc2
368	9.08559e-15	2.0526	0.183	0.041	2.09659e-10	Meninges	Adamtsl3
369	0	2.02264	0.624	0.022	0	Meninges	Eya2
370	3.16208e-110	2.01659	0.651	0.085	7.29681e-106	Meninges	Cp
371	4.89242e-57	1.97841	0.789	0.277	1.12897e-52	Meninges	Bicc1
372	0	1.9739	0.651	0.025	0	Meninges	Arhgap29
373	9.22402e-290	1.95845	0.367	0.008	2.12854e-285	Meninges	Vtn
374	4.90375e-32	1.93617	0.78	0.443	1.13159e-27	Meninges	Dlc1
375	0	1.92252	0.679	0.02	0	Meninges	Cfh
376	3.03625e-65	1.91431	0.661	0.143	7.00645e-61	Meninges	Sned1
377	1.04274e-104	1.91056	0.587	0.07	2.40623e-100	Meninges	Ror1
378	9.08946e-94	1.90082	0.431	0.04	2.09748e-89	Meninges	Itih5
379	3.81074e-87	1.88854	0.404	0.039	8.79366e-83	Meninges	Dcdc2a
380	1.21498e-73	1.88419	0.761	0.176	2.80369e-69	Meninges	Pde1a
381	6.37818e-57	1.87569	0.826	0.245	1.47183e-52	Meninges	Atp1a2
382	1.50566e-51	1.87532	0.78	0.275	3.47446e-47	Meninges	Fkbp5
383	1.00608e-30	1.85803	0.642	0.3	2.32164e-26	Meninges	Prkag2
384	1.10575e-132	1.83523	0.514	0.042	2.55163e-128	Meninges	Col23a1
385	1.72336e-233	1.81704	0.67	0.04	3.97682e-229	Meninges	Nr2f2
386	2.599e-24	1.80168	0.633	0.275	5.99746e-20	Meninges	Apod
387	6.02429e-124	1.7686	0.532	0.047	1.39017e-119	Meninges	Eya1
388	3.30485e-51	1.76696	0.743	0.263	7.62627e-47	Meninges	Tgfbr3
389	1.47786e-22	1.75332	0.303	0.074	3.41032e-18	Meninges	Cemip
390	0	1.74486	0.606	0.012	0	Meninges	Uaca
391	6.19068e-24	1.7392	0.761	0.55	1.42856e-19	Meninges	Alcam
392	8.63791e-287	1.73466	0.183	0.001	1.99328e-282	Meninges	Slc47a1
393	2.89976e-177	1.71875	0.596	0.042	6.69149e-173	Meninges	Phldb2
394	0	1.66998	0.44	0.01	0	Meninges	Slc16a12
395	0	1.65441	0.523	0.012	0	Meninges	Rbpms
396	6.74106e-36	1.64821	0.44	0.107	1.55557e-31	Meninges	Il34
397	3.42429e-50	1.63129	0.633	0.16	7.90189e-46	Meninges	Cald1
398	4.80217e-191	1.62718	0.413	0.017	1.10815e-186	Meninges	Dcn
399	1.67782e-37	1.59477	0.798	0.444	3.87175e-33	Meninges	Foxp1
400	4.29095e-223	0.852867	0.275	0.006	9.9018e-219	Meninges	Foxc1
401	0	3.62673	1	0.024	0	Ependymal cell	1700007G11Rik
402	0	3.24711	1	0.006	0	Ependymal cell	Dnah12
403	2.30792e-167	3.21415	1	0.05	5.32577e-163	Ependymal cell	Spag16
404	0	2.74163	0.947	0.008	0	Ependymal cell	Ccdc146
405	3.1245e-122	2.71223	0.895	0.055	7.2101e-118	Ependymal cell	Ccdc162
406	1.0629e-172	2.70036	0.974	0.045	2.45275e-168	Ependymal cell	Ak7
407	1.90292e-145	2.67345	0.947	0.051	4.39119e-141	Ependymal cell	3300002A11Rik
408	3.33633e-32	2.63052	0.921	0.27	7.69892e-28	Ependymal cell	Nnat
409	0	2.63001	0.974	0.005	0	Ependymal cell	Dnah6
410	1.54917e-208	2.60598	0.974	0.037	3.57486e-204	Ependymal cell	Cfap44
411	1.19238e-63	2.57503	0.947	0.133	2.75153e-59	Ependymal cell	Cfap54
412	5.31745e-179	2.56255	0.921	0.038	1.22705e-174	Ependymal cell	Rgs22
413	1.53483e-177	2.54364	0.816	0.03	3.54178e-173	Ependymal cell	Wdr49
414	4.27494e-50	2.53861	0.947	0.175	9.86486e-46	Ependymal cell	Adamts20
415	0	2.53457	0.921	0.001	0	Ependymal cell	Tmem212
416	1.0246e-86	2.52955	0.921	0.086	2.36436e-82	Ependymal cell	Dnah9
417	0	2.47337	0.868	0.015	0	Ependymal cell	Hydin
418	1.38936e-246	2.47044	0.921	0.027	3.2061e-242	Ependymal cell	Cfap43
419	0	2.45918	0.816	0.002	0	Ependymal cell	Gm10714
420	0	2.43774	0.868	0.007	0	Ependymal cell	Ak9
421	0	2.43638	0.737	0.001	0	Ependymal cell	Unc5cl
422	2.92707e-212	2.40399	0.921	0.032	6.75452e-208	Ependymal cell	Cfap61
423	0	2.40182	0.921	0.004	0	Ependymal cell	Ccdc170
424	0	2.37899	0.921	0.001	0	Ependymal cell	C230072F16Rik
425	0	2.3711	0.974	0.017	0	Ependymal cell	Spag17
426	0	2.36254	0.921	0.011	0	Ependymal cell	Vwa3a
427	0	2.33552	0.974	0.017	0	Ependymal cell	Cfap65
428	2.41599e-72	2.33302	0.868	0.089	5.57513e-68	Ependymal cell	Gm973
429	0	2.32034	0.842	0.005	0	Ependymal cell	Lrrc36
430	1.08735e-215	2.30609	0.895	0.029	2.50916e-211	Ependymal cell	Ccdc114
431	0	2.28733	0.868	0.003	0	Ependymal cell	Dnaaf3
432	0	2.27102	0.842	0.004	0	Ependymal cell	Wdr63
433	1.43886e-212	2.26815	0.711	0.018	3.32032e-208	Ependymal cell	Gm13481
434	2.13287e-91	2.23433	0.895	0.075	4.92181e-87	Ependymal cell	Spef2
435	1.16272e-65	2.22059	0.947	0.117	2.6831e-61	Ependymal cell	Glis3
436	8.5166e-139	2.19264	0.868	0.044	1.96529e-134	Ependymal cell	Spata17
437	0	2.18949	0.763	0.003	0	Ependymal cell	Rassf9
438	7.05543e-273	2.16456	0.895	0.022	1.62811e-268	Ependymal cell	Dnah2
439	0	2.15824	0.842	0.014	0	Ependymal cell	Cdhr3
440	0	2.1566	0.789	0.01	0	Ependymal cell	Armc4
441	4.76647e-43	2.13774	0.921	0.193	1.09991e-38	Ependymal cell	Lrriq1
442	1.58869e-49	2.13657	0.842	0.126	3.66607e-45	Ependymal cell	Kif6
443	0	2.1003	0.895	0	0	Ependymal cell	Ccdc180
444	2.83473e-248	2.09026	0.789	0.019	6.54142e-244	Ependymal cell	Wdr66
445	0	2.08181	0.789	0.012	0	Ependymal cell	Dnah10
446	2.0278e-141	2.05385	0.842	0.04	4.67934e-137	Ependymal cell	Ttll8
447	6.50372e-68	2.04782	0.895	0.1	1.5008e-63	Ependymal cell	Ttll3
448	1.12778e-271	2.03345	0.737	0.015	2.60247e-267	Ependymal cell	Ttc29
449	4.57198e-42	2.0226	0.921	0.199	1.05503e-37	Ependymal cell	Cfap69
450	1.94977e-22	2.01813	0.816	0.298	4.49929e-18	Ependymal cell	Dnah11
