# Supplementary material for: Transcriptomic encoding of sensorimotor transformation in the midbrain
Source: eLife. 2021 Jul 28;10:e69825. doi: 10.7554/eLife.69825 (PMC8341986; doi:10.7554/eLife.69825)
Supplement: Supplementary file 2. [file elife-69825-supp2.xlsx]

## Sheet: Excitatory_neuron_subtype_DEGs
Table S2: Top200 differentially expressed genes among 9 Excitatory neuron subtypes
	p_val	avg_logFC	pct.1	pct.2	p_val_adj	cluster	gene
1	1.12693e-226	0.782216	0.963	0.766	2.60051e-222	Ex-2	Cdh18
2	1.1316e-124	0.721842	0.55	0.216	2.61127e-120	Ex-2	Gm32647
3	1.2145e-132	0.610451	0.854	0.566	2.80258e-128	Ex-2	Npas3
4	3.85726e-91	0.582726	0.796	0.559	8.901e-87	Ex-2	Zfhx3
5	4.49638e-118	0.565809	0.763	0.42	1.03758e-113	Ex-2	Htr2c
6	1.50653e-130	0.558155	0.799	0.477	3.47647e-126	Ex-2	Klhl1
7	4.87438e-133	0.506767	0.787	0.457	1.12481e-128	Ex-2	Rasgef1b
8	1.39113e-57	0.489583	0.728	0.518	3.21017e-53	Ex-2	Gpc5
9	5.41413e-126	0.472067	0.561	0.214	1.24936e-121	Ex-2	Vwc2l
10	2.63263e-103	0.457106	0.643	0.321	6.07505e-99	Ex-2	Gm28905
11	7.04241e-110	0.453765	0.91	0.701	1.62511e-105	Ex-2	Gria1
12	9.94539e-95	0.434772	0.88	0.593	2.295e-90	Ex-2	Hs3st4
13	7.93849e-51	0.423113	0.395	0.199	1.83189e-46	Ex-2	Kcnmb2
14	6.42961e-96	0.406002	0.937	0.716	1.4837e-91	Ex-2	Brinp3
15	2.50789e-51	0.396725	0.443	0.24	5.78721e-47	Ex-2	Tox
16	6.37939e-88	0.393329	0.681	0.387	1.47211e-83	Ex-2	Pcdh17
17	4.36634e-63	0.380763	0.545	0.307	1.00758e-58	Ex-2	Kcnt2
18	4.17381e-28	0.3733	0.441	0.298	9.63149e-24	Ex-2	Il1rapl2
19	2.14032e-37	0.372679	0.508	0.334	4.93901e-33	Ex-2	Ptprk
20	6.03777e-63	0.368949	0.667	0.413	1.39328e-58	Ex-2	Slit2
21	1.47839e-56	0.368757	0.425	0.218	3.41154e-52	Ex-2	Gm12239
22	2.32143e-95	0.352518	0.977	0.843	5.35693e-91	Ex-2	Celf4
23	1.11831e-88	0.3487	0.943	0.779	2.58062e-84	Ex-2	Nrxn3
24	1.10435e-70	0.341207	0.719	0.472	2.54839e-66	Ex-2	Rasgrf2
25	3.68555e-94	0.326002	0.991	0.9	8.50478e-90	Ex-2	Robo1
26	1.60622e-86	0.32463	0.997	0.947	3.70652e-82	Ex-2	Pde4d
27	7.01262e-50	0.314258	0.653	0.421	1.61823e-45	Ex-2	Sorcs3
28	2.28906e-64	0.309241	0.871	0.634	5.28222e-60	Ex-2	Edil3
29	7.04452e-31	0.30271	0.506	0.34	1.62559e-26	Ex-2	Foxp2
30	2.77906e-51	0.293617	0.756	0.522	6.41297e-47	Ex-2	Kcnip1
31	6.26304e-104	0.292029	0.999	0.994	1.44526e-99	Ex-2	Lsamp
32	4.94754e-56	0.290871	0.493	0.268	1.1417e-51	Ex-2	Dpyd
33	4.7981e-48	0.289595	0.772	0.563	1.10721e-43	Ex-2	Alcam
34	7.08991e-48	0.287979	0.49	0.277	1.63607e-43	Ex-2	Baiap3
35	3.71599e-15	0.286726	0.13	0.064	8.57501e-11	Ex-2	Nfib
36	4.89919e-99	0.286538	0.994	0.893	1.13054e-94	Ex-2	Dscam
37	1.99051e-38	0.280012	0.482	0.296	4.59331e-34	Ex-2	Zfp521
38	7.58055e-26	0.278803	0.385	0.244	1.74929e-21	Ex-2	Cadps2
39	4.27614e-66	0.278177	0.525	0.269	9.86761e-62	Ex-2	Gm48742
40	5.7692e-23	0.275384	0.325	0.201	1.3313e-18	Ex-2	Col11a1
41	4.44366e-80	0.274965	0.995	0.947	1.02542e-75	Ex-2	Csmd3
42	1.51943e-46	0.274496	0.819	0.588	3.50625e-42	Ex-2	Gm15398
43	2.36279e-50	0.273211	0.636	0.412	5.45238e-46	Ex-2	Xylt1
44	9.6198e-59	0.27304	0.993	0.926	2.21986e-54	Ex-2	Grid2
45	6.49338e-36	0.26711	0.325	0.168	1.49841e-31	Ex-2	Sox5
46	1.00521e-28	0.266612	0.517	0.356	2.31963e-24	Ex-2	Fstl4
47	4.08166e-68	0.265785	0.742	0.471	9.41884e-64	Ex-2	Syt16
48	7.72921e-59	0.265284	0.678	0.43	1.78359e-54	Ex-2	Hap1
49	9.17645e-46	0.264973	0.492	0.293	2.11756e-41	Ex-2	Greb1l
50	3.92986e-48	0.262077	0.954	0.819	9.06854e-44	Ex-2	Pcdh15
51	6.80258e-54	0.259462	0.868	0.667	1.56976e-49	Ex-2	Grb10
52	2.86856e-20	0.259196	0.785	0.681	6.6195e-16	Ex-2	Gpc6
53	7.73527e-68	0.257993	0.554	0.295	1.78499e-63	Ex-2	Dgkg
54	1.99407e-53	0.251843	0.282	0.107	4.60152e-49	Ex-2	Gm4876
55	3.11794e-27	0.250059	0.784	0.668	7.19496e-23	Ex-2	Fstl5
56	1.42209e-66	0.241734	0.972	0.872	3.28161e-62	Ex-2	Smyd3
57	1.41565e-16	0.241715	0.304	0.205	3.26676e-12	Ex-2	Synpr
58	2.39515e-35	0.239626	0.689	0.498	5.52704e-31	Ex-2	Cntnap5c
59	2.87327e-50	0.239364	0.568	0.338	6.63036e-46	Ex-2	B230217J21Rik
60	1.34537e-46	0.23318	0.679	0.457	3.10457e-42	Ex-2	Grik4
61	3.5319e-41	0.22911	0.754	0.577	8.1502e-37	Ex-2	Ankrd24
62	1.70236e-49	0.227915	0.975	0.89	3.92837e-45	Ex-2	Cadm1
63	2.99483e-29	0.227545	0.803	0.656	6.91087e-25	Ex-2	Grm8
64	5.34235e-53	0.226713	0.657	0.413	1.2328e-48	Ex-2	Frmpd3
65	7.92885e-53	0.223407	0.638	0.408	1.82966e-48	Ex-2	Bbs9
66	9.00478e-27	0.22008	0.578	0.416	2.07794e-22	Ex-2	Arhgap24
67	2.56232e-50	0.2198	0.738	0.529	5.9128e-46	Ex-2	Phlpp2
68	1.11593e-18	0.216347	0.578	0.446	2.57511e-14	Ex-2	Tmtc2
69	1.66107e-33	0.214077	0.756	0.573	3.83309e-29	Ex-2	Elavl2
70	6.79453e-16	0.213269	0.323	0.218	1.56791e-11	Ex-2	D130079A08Rik
71	7.47434e-24	0.211851	0.649	0.514	1.72478e-19	Ex-2	Prr16
72	3.29527e-48	0.211312	0.344	0.154	7.60416e-44	Ex-2	Lncenc1
73	2.29474e-46	0.210443	0.196	0.062	5.29534e-42	Ex-2	Esr1
74	2.68531e-37	0.209248	0.929	0.803	6.19663e-33	Ex-2	Cacna1e
75	3.98018e-32	0.208555	0.312	0.169	9.18467e-28	Ex-2	Onecut2
76	4.07599e-26	0.208511	0.396	0.247	9.40575e-22	Ex-2	Pde1a
77	1.18784e-41	0.206289	0.814	0.626	2.74106e-37	Ex-2	Cdh10
78	1.75407e-48	0.205762	0.324	0.145	4.0477e-44	Ex-2	Efcab1
79	3.43012e-39	0.205599	0.356	0.185	7.91534e-35	Ex-2	Zbtb16
80	3.99871e-54	0.204404	0.293	0.114	9.22743e-50	Ex-2	Ldlr
81	1.12951e-40	0.203017	0.844	0.661	2.60646e-36	Ex-2	Acaca
82	7.88064e-26	0.202909	0.841	0.718	1.81854e-21	Ex-2	Ryr3
83	1.9264e-43	0.200484	0.887	0.706	4.44535e-39	Ex-2	Nova1
84	3.37083e-22	0.198788	0.76	0.622	7.77852e-18	Ex-2	Cdh4
85	3.9756e-47	0.198101	0.472	0.265	9.17411e-43	Ex-2	Coro2a
86	5.40892e-37	0.197954	0.374	0.203	1.24816e-32	Ex-2	Slc44a5
87	4.14416e-47	0.19662	0.449	0.245	9.56305e-43	Ex-2	Zdbf2
88	3.40567e-25	0.196493	0.765	0.633	7.85892e-21	Ex-2	Cntnap4
89	2.86243e-27	0.196145	0.704	0.528	6.60535e-23	Ex-2	Pde7b
90	1.51114e-28	0.195176	0.201	0.09	3.48712e-24	Ex-2	Adamts19
91	8.69218e-41	0.19483	0.881	0.728	2.00581e-36	Ex-2	C530008M17Rik
92	2.28187e-29	0.1933	0.735	0.568	5.26563e-25	Ex-2	Arhgap18
93	5.74835e-32	0.192388	0.887	0.753	1.32649e-27	Ex-2	Mmp16
94	1.02825e-26	0.190977	0.812	0.646	2.37278e-22	Ex-2	Luzp2
95	1.25945e-35	0.190185	0.881	0.733	2.9063e-31	Ex-2	Aff3
96	7.63107e-26	0.189121	0.613	0.444	1.76094e-21	Ex-2	Zmat4
97	1.54574e-25	0.188345	0.349	0.213	3.56696e-21	Ex-2	Nckap5
98	4.31319e-15	0.187773	0.463	0.343	9.95311e-11	Ex-2	Tmcc3
99	3.05448e-40	0.18776	0.921	0.741	7.04851e-36	Ex-2	Plxna4
100	2.87093e-40	0.187659	0.823	0.622	6.62495e-36	Ex-2	Jazf1
101	6.69616e-43	0.186496	0.442	0.244	1.54521e-38	Ex-2	Phka1
102	1.74493e-44	0.186119	0.498	0.295	4.0266e-40	Ex-2	Myrip
103	1.21014e-35	0.185214	0.812	0.624	2.79251e-31	Ex-2	Traf3
104	4.93772e-23	0.184038	0.153	0.066	1.13943e-18	Ex-2	Cpa6
105	6.21649e-36	0.182894	0.883	0.729	1.43452e-31	Ex-2	Slc24a2
106	1.73521e-14	0.18216	0.256	0.171	4.00417e-10	Ex-2	Nfia
107	1.75543e-35	0.181713	0.653	0.453	4.05082e-31	Ex-2	Ubap1l
108	4.72782e-43	0.181445	0.349	0.172	1.09099e-38	Ex-2	AC154782.1
109	1.75815e-39	0.180453	0.405	0.217	4.05711e-35	Ex-2	Atp2b4
110	3.46155e-33	0.179445	0.77	0.588	7.98788e-29	Ex-2	Pcyt2
111	1.53228e-33	0.179137	0.991	0.931	3.53588e-29	Ex-2	Grm5
112	2.41183e-32	0.177405	0.701	0.508	5.56553e-28	Ex-2	4933406I18Rik
113	7.84884e-55	0.177098	0.192	0.049	1.8112e-50	Ex-2	Dgkk
114	3.65599e-16	0.176622	0.269	0.171	8.43655e-12	Ex-2	Cdh20
115	7.50064e-17	0.17659	0.527	0.39	1.73085e-12	Ex-2	Sdk1
116	2.24209e-30	0.176152	0.319	0.177	5.17384e-26	Ex-2	Glra2
117	9.11079e-37	0.175545	0.377	0.205	2.10241e-32	Ex-2	Gm44644
118	9.90275e-35	0.175322	0.84	0.646	2.28516e-30	Ex-2	Cntn6
119	3.51952e-28	0.174652	0.293	0.159	8.12165e-24	Ex-2	Gpr149
120	1.33997e-39	0.171507	0.537	0.336	3.09211e-35	Ex-2	Srebf2
121	3.26999e-41	0.171358	0.329	0.159	7.54583e-37	Ex-2	Arhgef28
122	1.54697e-23	0.170942	0.893	0.78	3.56978e-19	Ex-2	Mast4
123	1.4952e-32	0.17089	0.51	0.324	3.45031e-28	Ex-2	Rerg
124	4.02099e-28	0.170492	0.608	0.436	9.27883e-24	Ex-2	Catspere2
125	1.44818e-28	0.169489	0.804	0.627	3.34181e-24	Ex-2	Chl1
126	2.89739e-21	0.169487	0.483	0.345	6.68601e-17	Ex-2	Ghr
127	3.80823e-28	0.169323	0.672	0.518	8.78788e-24	Ex-2	5031425E22Rik
128	2.11826e-31	0.167381	0.669	0.497	4.88809e-27	Ex-2	Neo1
129	1.71818e-34	0.164697	0.256	0.117	3.96488e-30	Ex-2	Gm33680
130	2.60497e-51	0.164569	0.221	0.069	6.01122e-47	Ex-2	Zim1
131	2.38462e-28	0.163764	0.175	0.071	5.50274e-24	Ex-2	Prlr
132	5.5761e-31	0.16337	0.892	0.761	1.28674e-26	Ex-2	Cacna1b
133	9.22499e-20	0.16336	0.934	0.852	2.12876e-15	Ex-2	Gnas
134	6.31381e-28	0.162161	0.227	0.108	1.45698e-23	Ex-2	Calb2
135	6.58994e-28	0.160468	0.236	0.117	1.52069e-23	Ex-2	Fxyd6
136	7.01343e-33	0.160412	0.357	0.196	1.61842e-28	Ex-2	4930447C04Rik
137	2.7688e-20	0.158337	0.599	0.451	6.38929e-16	Ex-2	Shisa6
138	5.16953e-32	0.158201	0.941	0.829	1.19292e-27	Ex-2	Ksr2
139	4.03853e-27	0.157676	0.953	0.856	9.31932e-23	Ex-2	Dnajc6
140	1.80618e-29	0.157628	0.607	0.432	4.16793e-25	Ex-2	Pdcd7
141	1.38014e-16	0.157347	0.814	0.673	3.18481e-12	Ex-2	Spock1
142	5.56724e-29	0.1571	0.662	0.476	1.2847e-24	Ex-2	Arnt2
143	1.40573e-52	0.157034	0.189	0.05	3.24387e-48	Ex-2	Col15a1
144	1.77214e-28	0.156799	0.443	0.28	4.08938e-24	Ex-2	Adamts17
145	2.15251e-23	0.156322	0.804	0.689	4.96714e-19	Ex-2	Stx16
146	9.97619e-20	0.155377	0.595	0.458	2.3021e-15	Ex-2	Kcnk2
147	1.37968e-10	0.154916	0.406	0.309	3.18375e-06	Ex-2	Rnf220
148	2.79944e-17	0.154484	0.391	0.267	6.45998e-13	Ex-2	Sema5a
149	1.72838e-31	0.153734	0.487	0.311	3.9884e-27	Ex-2	Slc35f3
150	2.84797e-22	0.153502	0.505	0.362	6.57198e-18	Ex-2	Crim1
151	1.07688e-23	0.153417	0.954	0.868	2.48501e-19	Ex-2	Unc5d
152	8.23398e-34	0.153239	0.983	0.919	1.90007e-29	Ex-2	Usp29
153	6.47603e-50	0.152922	0.999	0.99	1.49441e-45	Ex-2	Cntnap2
154	7.79685e-29	0.152919	0.961	0.875	1.7992e-24	Ex-2	Sybu
155	1.85706e-18	0.152678	0.79	0.637	4.28534e-14	Ex-2	Hs6st3
156	2.86886e-26	0.15232	0.678	0.494	6.62018e-22	Ex-2	Cobl
157	3.31973e-13	0.151466	0.65	0.537	7.66061e-09	Ex-2	Pcdh11x
158	1.733e-45	0.150426	0.26	0.1	3.99907e-41	Ex-2	Dchs2
159	5.83913e-21	0.149873	0.938	0.84	1.34744e-16	Ex-2	Astn2
160	2.75689e-23	0.149596	0.511	0.363	6.36179e-19	Ex-2	Spink10
161	3.77205e-08	0.149311	0.711	0.634	0.000870438	Ex-2	Cdh12
162	1.72809e-35	0.148518	0.991	0.927	3.98774e-31	Ex-2	Erc2
163	6.33333e-27	0.148515	0.796	0.634	1.46148e-22	Ex-2	Zdhhc20
164	8.02313e-26	0.14797	0.312	0.179	1.85142e-21	Ex-2	Gm2824
165	1.86633e-18	0.147431	0.848	0.735	4.30675e-14	Ex-2	Prickle2
166	9.86763e-22	0.147314	0.959	0.861	2.27705e-17	Ex-2	Car10
167	3.68532e-26	0.14695	0.723	0.553	8.50423e-22	Ex-2	Pkp4
168	7.95535e-22	0.146856	0.811	0.656	1.83578e-17	Ex-2	Kcnq5
169	3.10764e-31	0.146668	0.463	0.286	7.17118e-27	Ex-2	Mpdz
170	3.05054e-30	0.146451	0.541	0.35	7.03943e-26	Ex-2	St6galnac5
171	1.56568e-34	0.146391	0.326	0.171	3.61295e-30	Ex-2	Fdft1
172	2.23684e-38	0.145773	0.317	0.153	5.16172e-34	Ex-2	Ildr2
173	2.74932e-22	0.145678	0.672	0.525	6.34433e-18	Ex-2	Tro
174	4.07878e-28	0.145004	0.884	0.753	9.41219e-24	Ex-2	Dip2b
175	8.67513e-31	0.14492	0.931	0.796	2.00187e-26	Ex-2	Nalcn
176	1.60844e-34	0.143921	0.991	0.933	3.71163e-30	Ex-2	Agbl4
177	4.68046e-37	0.1439	0.314	0.154	1.08006e-32	Ex-2	Gm44643
178	8.02187e-52	0.14326	0.849	0.652	1.85113e-47	Ex-2	C130073E24Rik
179	7.04801e-32	0.142622	0.311	0.165	1.6264e-27	Ex-2	Tmem2
180	1.42835e-30	0.142586	0.653	0.458	3.29606e-26	Ex-2	Rab27b
181	1.1918e-19	0.142505	0.384	0.257	2.75019e-15	Ex-2	Pou2f2
182	1.19174e-23	0.142477	0.966	0.879	2.75007e-19	Ex-2	Ctnna3
183	3.53182e-22	0.141288	0.852	0.702	8.15002e-18	Ex-2	CT025619.1
184	3.70331e-21	0.141068	0.6	0.435	8.54575e-17	Ex-2	Kctd8
185	1.6707e-22	0.140433	0.547	0.39	3.8553e-18	Ex-2	Plxna2
186	1.23463e-24	0.140339	0.638	0.489	2.84902e-20	Ex-2	Zfp612
187	5.61535e-25	0.140318	0.747	0.585	1.2958e-20	Ex-2	Ak5
188	2.08733e-22	0.140063	0.325	0.197	4.81673e-18	Ex-2	Gm15584
189	1.32191e-32	0.139534	0.174	0.065	3.05044e-28	Ex-2	Whrn
190	2.57662e-13	0.139308	0.995	0.95	5.9458e-09	Ex-2	Negr1
191	4.22946e-26	0.139298	0.477	0.317	9.75989e-22	Ex-2	Sh3gl3
192	6.6385e-29	0.139051	0.457	0.285	1.5319e-24	Ex-2	Plekha7
193	6.14438e-18	0.138974	0.354	0.24	1.41788e-13	Ex-2	Ccdc148
194	5.28416e-16	0.138944	0.368	0.257	1.21937e-11	Ex-2	Nnat
195	1.44097e-24	0.138522	0.905	0.788	3.32519e-20	Ex-2	Map2k4
196	3.77157e-21	0.138481	0.216	0.114	8.70327e-17	Ex-2	Sema3c
197	1.15389e-24	0.1382	0.916	0.783	2.66271e-20	Ex-2	Syn2
198	2.12263e-28	0.138074	0.497	0.323	4.89818e-24	Ex-2	Stard9
199	1.25934e-30	0.138006	0.305	0.16	2.90606e-26	Ex-2	Peli2
200	3.54754e-22	0.137925	0.506	0.357	8.18629e-18	Ex-2	D3Ertd751e
201	4.71822e-208	0.77552	0.516	0.109	1.08878e-203	Ex-1	Tfap2b
202	7.85224e-82	0.620307	0.31	0.093	1.81198e-77	Ex-1	D130009I18Rik
203	5.15654e-57	0.583955	0.204	0.057	1.18992e-52	Ex-1	Etv1
204	2.08073e-143	0.555932	0.332	0.053	4.8015e-139	Ex-1	B230323A14Rik
205	1.57931e-51	0.544123	0.784	0.722	3.64442e-47	Ex-1	Tshz2
206	0.000158289	0.486077	0.38	0.364	1	Ex-1	Zfpm2
207	1.44274e-31	0.477086	0.681	0.598	3.32927e-27	Ex-1	Gm26883
208	1.1189e-56	0.453923	0.219	0.063	2.58198e-52	Ex-1	2600014E21Rik
209	4.67144e-26	0.414247	0.674	0.596	1.07798e-21	Ex-1	Sema6d
210	2.76246e-44	0.412118	0.296	0.135	6.37466e-40	Ex-1	Arhgap15
211	9.29497e-43	0.394836	0.404	0.208	2.14491e-38	Ex-1	AC129186.1
212	1.35819e-35	0.392167	0.448	0.273	3.13415e-31	Ex-1	Zeb2
213	1.69592e-32	0.391303	0.212	0.091	3.91351e-28	Ex-1	Plce1
214	3.93788e-22	0.36324	0.769	0.731	9.08706e-18	Ex-1	Etl4
215	2.59893e-27	0.361654	0.706	0.618	5.9973e-23	Ex-1	Thsd7b
216	1.25797e-13	0.35111	0.58	0.561	2.90289e-09	Ex-1	Epha7
217	3.48402e-19	0.345694	0.376	0.279	8.03972e-15	Ex-1	Tshz3
218	3.2754e-46	0.342191	0.365	0.182	7.55831e-42	Ex-1	Mdga1
219	1.95897e-25	0.336154	0.848	0.878	4.52053e-21	Ex-1	Fam19a2
220	3.42054e-10	0.333559	0.357	0.291	7.89323e-06	Ex-1	Reln
221	8.89902e-24	0.330162	0.857	0.838	2.05354e-19	Ex-1	Gabrg3
222	1.4026e-10	0.328457	0.223	0.154	3.23663e-06	Ex-1	Fbxl7
223	2.94264e-15	0.32751	0.741	0.72	6.79043e-11	Ex-1	Unc13c
224	1.67914e-18	0.327326	0.544	0.457	3.87479e-14	Ex-1	Man1a
225	1.06649e-08	0.318115	0.513	0.495	0.000246104	Ex-1	Plcl1
226	2.86933e-14	0.299438	0.738	0.804	6.62127e-10	Ex-1	Dock4
227	1.26369e-10	0.296506	0.674	0.649	2.91608e-06	Ex-1	Ebf1
228	2.81726e-14	0.279478	0.464	0.382	6.5011e-10	Ex-1	Htr4
229	2.11799e-13	0.274718	0.395	0.327	4.88748e-09	Ex-1	Akap13
230	2.18592e-07	0.274703	0.57	0.575	0.00504422	Ex-1	Pbx3
231	9.15152e-58	0.267815	0.173	0.037	2.1118e-53	Ex-1	Gm26688
232	6.38927e-11	0.264792	0.534	0.468	1.47439e-06	Ex-1	Stxbp6
233	1.82234e-06	0.260383	0.448	0.415	0.0420524	Ex-1	St6galnac5
234	1.4345e-08	0.259068	0.802	0.859	0.000331025	Ex-1	Auts2
235	4.82315e-11	0.249922	0.844	0.94	1.11299e-06	Ex-1	Slc35f1
236	2.32327e-15	0.244532	0.942	0.998	5.36117e-11	Ex-1	Ctnna2
237	4.35228e-08	0.244239	0.738	0.721	0.00100433	Ex-1	Ptprt
238	1.63144e-25	0.241987	0.948	0.999	3.7647e-21	Ex-1	Magi2
239	2.20448e-06	0.24138	0.442	0.392	0.0508706	Ex-1	Foxp2
240	7.02863e-06	0.240988	0.632	0.647	0.162193	Ex-1	Alcam
241	3.72819e-09	0.234317	0.828	0.908	8.60317e-05	Ex-1	Kcnh7
242	4.74724e-10	0.232509	0.422	0.367	1.09547e-05	Ex-1	BC030499
243	5.09594e-08	0.230881	0.357	0.281	0.00117594	Ex-1	Sox6
244	1.01041e-30	0.230797	0.948	0.994	2.33162e-26	Ex-1	Rora
245	5.38733e-05	0.230305	0.571	0.603	1	Ex-1	Nos1ap
246	7.52224e-08	0.228769	0.844	0.915	0.00173583	Ex-1	Grip1
247	3.71216e-05	0.224181	0.271	0.232	0.856617	Ex-1	Slc15a2
248	1.46457e-07	0.223685	0.737	0.824	0.00337965	Ex-1	Btbd9
249	1.11464e-24	0.217579	0.132	0.047	2.57215e-20	Ex-1	Bmpr1b
250	0.000403401	0.217282	0.631	0.668	1	Ex-1	Thrb
251	4.63041e-17	0.216995	0.229	0.136	1.06851e-12	Ex-1	Gm29865
252	3.46162e-16	0.211821	0.885	0.948	7.98802e-12	Ex-1	Rmst
253	2.18541e-12	0.211356	0.204	0.13	5.04306e-08	Ex-1	Cemip
254	9.1622e-07	0.208264	0.338	0.286	0.0211427	Ex-1	Cadps2
255	1.70357e-15	0.207874	0.923	0.961	3.93116e-11	Ex-1	Grid2
256	2.21807e-06	0.207431	0.273	0.23	0.0511841	Ex-1	Lmo4
257	1.7833e-10	0.206882	0.325	0.237	4.11514e-06	Ex-1	D130079A08Rik
258	0.0012937	0.206158	0.391	0.476	1	Ex-1	Adarb2
259	5.94903e-16	0.204993	0.236	0.143	1.3728e-11	Ex-1	Hgf
260	2.37029e-18	0.20467	0.96	0.999	5.46968e-14	Ex-1	Cadm2
261	1.01991e-22	0.204022	0.123	0.044	2.35354e-18	Ex-1	Piezo2
262	2.80213e-09	0.20402	0.427	0.347	6.4662e-05	Ex-1	Ntng2
263	6.77964e-05	0.202834	0.607	0.653	1	Ex-1	Gtdc1
264	3.1065e-10	0.199096	0.877	0.906	7.16856e-06	Ex-1	Car10
265	0.00037908	0.198688	0.332	0.304	1	Ex-1	Utrn
266	7.96957e-08	0.197159	0.87	0.925	0.00183906	Ex-1	Kcnb2
267	3.727e-15	0.196216	0.856	0.908	8.60043e-11	Ex-1	Kcnc2
268	3.5426e-13	0.193432	0.342	0.251	8.1749e-09	Ex-1	Stac2
269	5.78978e-06	0.1916	0.608	0.624	0.133605	Ex-1	C130071C03Rik
270	0.00108901	0.189271	0.628	0.673	1	Ex-1	Grin3a
271	3.12644e-05	0.187462	0.399	0.357	0.721456	Ex-1	Zfp521
272	1.98985e-12	0.186945	0.92	0.98	4.59179e-08	Ex-1	Kcnd2
273	1.38283e-06	0.186617	0.237	0.184	0.0319102	Ex-1	Plch1
274	0.000602244	0.185924	0.393	0.501	1	Ex-1	Actb
275	1.07075e-10	0.184874	0.242	0.17	2.47086e-06	Ex-1	Tmem178
276	0.00114946	0.182469	0.345	0.315	1	Ex-1	Pde3a
277	5.64927e-06	0.182287	0.814	0.883	0.130362	Ex-1	Zbtb20
278	2.30626e-13	0.182188	0.93	0.989	5.32192e-09	Ex-1	Anks1b
279	0.000205989	0.179446	0.704	0.715	1	Ex-1	Grm8
280	4.94959e-06	0.178252	0.797	0.876	0.114217	Ex-1	Tnr
281	0.000109958	0.176993	0.367	0.344	1	Ex-1	Amotl1
282	1.89328e-06	0.176067	0.892	0.949	0.0436893	Ex-1	Robo1
283	0.000113579	0.175864	0.736	0.788	1	Ex-1	Nebl
284	1.32573e-05	0.174576	0.838	0.932	0.305925	Ex-1	Pcsk2
285	0.00080836	0.174469	0.238	0.209	1	Ex-1	Satb1
286	0.00590045	0.173385	0.404	0.505	1	Ex-1	Ppia
287	0.000228383	0.17315	0.495	0.602	1	Ex-1	Ubb
288	0.000322264	0.171512	0.278	0.246	1	Ex-1	Socs2
289	2.14867e-05	0.169562	0.909	0.984	0.495827	Ex-1	Asic2
290	2.91348e-22	0.166534	0.199	0.096	6.72313e-18	Ex-1	Arhgef26
291	1.6065e-17	0.16605	0.961	0.997	3.70716e-13	Ex-1	Fgf14
292	6.81671e-06	0.164585	0.747	0.764	0.157303	Ex-1	Nkain3
293	0.00563905	0.163316	0.36	0.444	1	Ex-1	Ubc
294	7.01327e-06	0.162384	0.734	0.789	0.161838	Ex-1	Nova1
295	0.00285218	0.162162	0.703	0.787	1	Ex-1	Snrpn
296	0.00663468	0.161581	0.411	0.504	1	Ex-1	Chd3os
297	3.62695e-08	0.161129	0.249	0.188	0.000836954	Ex-1	Gm35835
298	0.00238012	0.1593	0.49	0.477	1	Ex-1	Cdh11
299	0.00595372	0.156977	0.473	0.585	1	Ex-1	Hspa8
300	0.00656732	0.156375	0.107	0.084	1	Ex-1	Nfib
301	5.33135e-15	0.155486	0.741	0.875	1.23026e-10	Ex-1	Nrxn3
302	0.00107945	0.154679	0.255	0.224	1	Ex-1	Cradd
303	0.000588291	0.15308	0.82	0.916	1	Ex-1	Tmeff2
304	7.97948e-05	0.152137	0.779	0.797	1	Ex-1	Chrm3
305	7.15607e-06	0.152082	0.271	0.223	0.165134	Ex-1	Crhr1
306	0.00697024	0.151872	0.779	0.868	1	Ex-1	Camk1d
307	0.00238478	0.150703	0.937	0.998	1	Ex-1	Frmd4a
308	0.00049119	0.149159	0.34	0.314	1	Ex-1	Myo1b
309	0.000782672	0.146591	0.309	0.401	1	Ex-1	Tuba1b
310	1.47136e-08	0.143529	0.146	0.091	0.000339532	Ex-1	Tmem232
311	0.000715412	0.143172	0.79	0.895	1	Ex-1	Ncoa1
312	3.8595e-10	0.143112	0.127	0.071	8.90619e-06	Ex-1	Gm30524
313	0.000592127	0.141824	0.734	0.808	1	Ex-1	Aff3
314	0.000714975	0.139923	0.348	0.439	1	Ex-1	Tmsb4x
315	0.00394865	0.139616	0.357	0.447	1	Ex-1	Rpl9-ps6
316	2.74427e-09	0.138377	0.871	0.911	6.33267e-05	Ex-1	Unc5d
317	0.000595157	0.137321	0.302	0.396	1	Ex-1	Gm11808
318	0.000439285	0.136717	0.947	0.996	1	Ex-1	Ube3a
319	0.000356518	0.136513	0.727	0.818	1	Ex-1	D430041D05Rik
320	0.00591204	0.134406	0.199	0.175	1	Ex-1	Frmd6
321	0.0041489	0.134344	0.307	0.284	1	Ex-1	Atp2b4
322	0.000101649	0.132218	0.541	0.663	1	Ex-1	1700030F04Rik
323	0.000717825	0.132179	0.769	0.886	1	Ex-1	Camk2d
324	2.77172e-05	0.131848	0.948	0.999	0.639601	Ex-1	Fam155a
325	4.96279e-05	0.129025	0.147	0.109	1	Ex-1	Syne2
326	0.00341668	0.126805	0.327	0.407	1	Ex-1	Rplp1
327	0.000335234	0.124454	0.34	0.436	1	Ex-1	Camk2n2
328	2.96562e-05	0.12383	0.875	0.936	0.684345	Ex-1	Ryr2
329	0.00383939	0.123771	0.278	0.355	1	Ex-1	Gabarapl1
330	0.00325975	0.118221	0.322	0.396	1	Ex-1	Pgam1
331	3.05433e-06	0.117645	0.479	0.616	0.0704817	Ex-1	Cox8a
332	0.00206234	0.117429	0.402	0.497	1	Ex-1	Atp5f1
333	0.00950748	0.114729	0.129	0.105	1	Ex-1	Prlr
334	0.000203103	0.113172	0.179	0.139	1	Ex-1	Pou4f1
335	3.68379e-05	0.112879	0.895	0.948	0.850072	Ex-1	Pcdh7
336	0.00107748	0.111601	0.932	0.995	1	Ex-1	Fgf12
337	0.000135827	0.111071	0.826	0.945	1	Ex-1	Prkcb
338	0.000100841	0.110319	0.347	0.298	1	Ex-1	Tfap2d
339	0.000956164	0.110268	0.484	0.604	1	Ex-1	Flywch1
340	0.0029779	0.108278	0.255	0.329	1	Ex-1	Rpl14
341	0.000943564	0.10791	0.225	0.191	1	Ex-1	Gm30003
342	0.000392253	0.106093	0.409	0.524	1	Ex-1	Lars2
343	0.00106712	0.104122	0.338	0.43	1	Ex-1	Ywhah
344	0.000521739	0.103896	0.43	0.548	1	Ex-1	Slc25a4
345	0.000102264	0.103677	0.288	0.383	1	Ex-1	Rnf187
346	0.000120222	0.103671	0.395	0.528	1	Ex-1	Cnot6
347	0.000419036	0.103609	0.394	0.492	1	Ex-1	Aldoa
348	0.00788639	0.10191	0.289	0.359	1	Ex-1	Cfl1
349	0.00100554	0.101316	0.322	0.408	1	Ex-1	Ncdn
350	0.00163683	0.100393	0.375	0.47	1	Ex-1	Pnmal2
351	9.37946e-144	1.42373	1	0.661	2.1644e-139	Ex-7	Sorcs1
352	3.17087e-160	1.39927	0.952	0.329	7.31711e-156	Ex-7	Lhfp
353	1.04699e-148	1.31658	1	0.47	2.41603e-144	Ex-7	Col25a1
354	3.25596e-151	1.23452	0.981	0.389	7.51344e-147	Ex-7	Rorb
355	2.91753e-15	1.14106	0.64	0.608	6.73249e-11	Ex-7	Gm28928
356	1.7971e-83	1.11765	0.871	0.536	4.14698e-79	Ex-7	Kcnab1
357	8.11565e-82	1.05998	0.662	0.235	1.87277e-77	Ex-7	Megf11
358	2.33098e-130	1.0532	0.929	0.361	5.37898e-126	Ex-7	Prkd1
359	3.19721e-43	1.02039	0.646	0.382	7.37789e-39	Ex-7	Dach1
360	3.39383e-99	0.989085	0.99	0.632	7.83161e-95	Ex-7	Ebf1
361	6.15628e-110	0.98536	0.891	0.392	1.42062e-105	Ex-7	Mgll
362	5.45764e-98	0.98306	0.997	0.845	1.2594e-93	Ex-7	Sgcd
363	2.99524e-147	0.946165	0.83	0.229	6.91182e-143	Ex-7	Prmt8
364	1.37966e-125	0.927314	0.971	0.396	3.1837e-121	Ex-7	Gfra1
365	3.86974e-115	0.876546	0.768	0.237	8.92981e-111	Ex-7	Spon1
366	3.93664e-65	0.875475	0.958	0.698	9.0842e-61	Ex-7	Kcnq5
367	3.62433e-92	0.859977	0.997	0.883	8.36349e-88	Ex-7	Mgat4c
368	4.06855e-67	0.859493	0.498	0.152	9.38859e-63	Ex-7	Maf
369	7.27137e-75	0.826303	0.746	0.303	1.67794e-70	Ex-7	Nrgn
370	1.43869e-142	0.817471	0.804	0.208	3.31992e-138	Ex-7	Rftn1
371	1.14662e-79	0.815286	0.994	0.719	2.64594e-75	Ex-7	Tshz2
372	1.41545e-97	0.790775	0.997	0.891	3.2663e-93	Ex-7	Trpm3
373	3.80379e-81	0.785712	0.855	0.454	8.77763e-77	Ex-7	Vav3
374	5.21054e-209	0.770095	0.579	0.059	1.20238e-204	Ex-7	Robo3
375	3.02818e-82	0.770064	0.971	0.732	6.98783e-78	Ex-7	Ptchd4
376	1.01813e-70	0.76492	0.685	0.286	2.34945e-66	Ex-7	A330015K06Rik
377	3.22548e-93	0.762175	0.997	0.842	7.44312e-89	Ex-7	Slc24a3
378	4.14479e-39	0.749616	0.601	0.296	9.56452e-35	Ex-7	Zeb2
379	2.04477e-83	0.744514	0.952	0.506	4.71852e-79	Ex-7	Ankfn1
380	2.20893e-113	0.742573	0.685	0.176	5.09732e-109	Ex-7	Kitl
381	3.14872e-65	0.742325	0.862	0.56	7.26599e-61	Ex-7	Psd3
382	7.61304e-86	0.731912	1	0.893	1.75679e-81	Ex-7	Pam
383	5.33009e-68	0.726273	0.961	0.594	1.22997e-63	Ex-7	Gm26883
384	2.0758e-78	0.725159	0.926	0.691	4.79012e-74	Ex-7	Mtss1
385	2.20776e-88	0.724699	0.994	0.856	5.09463e-84	Ex-7	Grin2a
386	6.29259e-85	0.721261	1	0.913	1.45208e-80	Ex-7	Nrg1
387	1.26306e-64	0.713296	0.904	0.607	2.91463e-60	Ex-7	Sema6a
388	1.00233e-77	0.710848	0.984	0.855	2.31297e-73	Ex-7	Runx1t1
389	3.98245e-50	0.709161	0.431	0.134	9.18989e-46	Ex-7	Hmcn1
390	3.53553e-15	0.684059	0.849	0.796	8.15858e-11	Ex-7	Ntng1
391	8.43301e-57	0.676729	0.65	0.275	1.946e-52	Ex-7	Hs3st2
392	9.91439e-59	0.673766	0.958	0.673	2.28784e-54	Ex-7	Nell2
393	3.94009e-81	0.673496	0.875	0.338	9.09215e-77	Ex-7	Ebf2
394	5.15178e-66	0.651446	0.974	0.748	1.18882e-61	Ex-7	Thsd7a
395	3.40081e-59	0.643828	0.949	0.592	7.8477e-55	Ex-7	Sema6d
396	3.63341e-71	0.633304	0.749	0.333	8.38446e-67	Ex-7	Klhl5
397	1.86463e-31	0.620023	0.714	0.489	4.30281e-27	Ex-7	Dock10
398	7.94636e-60	0.61352	0.961	0.581	1.8337e-55	Ex-7	Lef1
399	2.06427e-66	0.612422	0.804	0.412	4.7635e-62	Ex-7	Eml1
400	6.44194e-65	0.612413	1	0.858	1.48654e-60	Ex-7	Robo2
401	5.20769e-46	0.596357	0.797	0.449	1.20173e-41	Ex-7	Lmo3
402	4.75626e-45	0.593948	0.884	0.614	1.09755e-40	Ex-7	Zfp385b
403	3.47912e-49	0.589775	0.322	0.08	8.02841e-45	Ex-7	Sulf1
404	1.2938e-55	0.585184	0.99	0.642	2.98557e-51	Ex-7	Erbb4
405	2.69914e-77	0.575462	1	0.943	6.22853e-73	Ex-7	Lhfpl3
406	1.86164e-69	0.574694	1	0.966	4.29591e-65	Ex-7	Grm7
407	5.40128e-72	0.572903	0.997	0.916	1.2464e-67	Ex-7	Rgs7
408	2.97699e-54	0.571916	0.974	0.741	6.8697e-50	Ex-7	Dscaml1
409	6.21716e-90	0.569901	0.428	0.082	1.43467e-85	Ex-7	Itga7
410	4.55266e-67	0.568695	0.99	0.92	1.05057e-62	Ex-7	Ppfia2
411	4.15197e-65	0.564881	0.405	0.094	9.58108e-61	Ex-7	Adam12
412	9.13191e-44	0.562921	0.608	0.294	2.10728e-39	Ex-7	Dpy19l1
413	4.68889e-57	0.562474	0.836	0.429	1.08201e-52	Ex-7	Adarb2
414	3.00621e-50	0.557921	0.704	0.358	6.93713e-46	Ex-7	Gfra2
415	6.55401e-16	0.549498	0.617	0.438	1.5124e-11	Ex-7	Cpne4
416	5.02579e-43	0.540197	0.707	0.393	1.15975e-38	Ex-7	Mical2
417	7.83776e-52	0.540014	0.932	0.736	1.80864e-47	Ex-7	Apba2
418	3.73656e-69	0.532657	0.994	0.959	8.62248e-65	Ex-7	Ppp2r2b
419	6.87986e-55	0.531593	0.952	0.695	1.5876e-50	Ex-7	Hcn1
420	2.04378e-18	0.516695	0.64	0.465	4.71623e-14	Ex-7	Arhgap6
421	4.03592e-57	0.514649	0.994	0.968	9.31329e-53	Ex-7	Gabrb3
422	7.82484e-60	0.510356	0.611	0.221	1.80566e-55	Ex-7	Sel1l3
423	2.5588e-77	0.50715	0.463	0.102	5.90469e-73	Ex-7	Pde5a
424	3.64025e-28	0.502779	0.559	0.303	8.40024e-24	Ex-7	Myo1b
425	1.22815e-41	0.499163	0.698	0.387	2.83408e-37	Ex-7	Ajap1
426	1.77269e-27	0.496233	0.887	0.714	4.09065e-23	Ex-7	Ptprt
427	9.71714e-39	0.495691	0.842	0.63	2.24233e-34	Ex-7	Syt7
428	2.43851e-82	0.488299	0.305	0.043	5.62711e-78	Ex-7	Bmp6
429	9.69316e-35	0.487369	0.756	0.442	2.23679e-30	Ex-7	Bcl11b
430	1.77364e-47	0.485311	0.672	0.309	4.09285e-43	Ex-7	Cpne9
431	4.09926e-41	0.479249	0.971	0.865	9.45946e-37	Ex-7	Ssbp2
432	3.60088e-35	0.475701	0.855	0.66	8.30939e-31	Ex-7	Tmtc1
433	3.56571e-30	0.47238	0.842	0.585	8.22824e-26	Ex-7	Epha4
434	1.07342e-39	0.471491	0.949	0.799	2.47702e-35	Ex-7	Brinp1
435	1.19689e-37	0.471385	0.945	0.765	2.76195e-33	Ex-7	Fhod3
436	5.05456e-47	0.471191	0.833	0.508	1.16639e-42	Ex-7	Ptpre
437	3.25939e-34	0.470882	0.965	0.83	7.52136e-30	Ex-7	Cntnap5b
438	3.59717e-67	0.469679	0.486	0.132	8.30082e-63	Ex-7	Cracr2a
439	4.37216e-34	0.466066	0.965	0.813	1.00892e-29	Ex-7	Focad
440	1.16253e-37	0.465902	0.868	0.599	2.68265e-33	Ex-7	Rbms1
441	1.49217e-38	0.464891	0.939	0.836	3.44333e-34	Ex-7	Arid1b
442	4.96895e-56	0.461813	1	0.957	1.14663e-51	Ex-7	Celf2
443	5.27214e-65	0.458743	1	0.987	1.2166e-60	Ex-7	Ptprd
444	7.30794e-43	0.455549	0.518	0.21	1.68638e-38	Ex-7	Cacna1h
445	2.06318e-42	0.452459	0.566	0.247	4.76098e-38	Ex-7	Antxr1
446	1.27617e-30	0.443561	0.547	0.272	2.9449e-26	Ex-7	Trpc7
447	7.60851e-17	0.440316	0.672	0.536	1.75574e-12	Ex-7	Cdh7
448	1.34452e-31	0.43747	0.916	0.717	3.10262e-27	Ex-7	Zfp804a
449	2.74451e-23	0.434989	0.923	0.889	6.33322e-19	Ex-7	Hecw2
450	1.6646e-28	0.428481	0.65	0.386	3.84124e-24	Ex-7	Ptchd1
451	1.11771e-36	0.423908	0.961	0.875	2.57923e-32	Ex-7	Srgap3
452	3.07154e-31	0.420484	0.768	0.438	7.08789e-27	Ex-7	Grik3
453	9.64245e-72	0.418411	0.302	0.048	2.22509e-67	Ex-7	Myo1e
454	5.77605e-34	0.418348	0.537	0.255	1.33288e-29	Ex-7	Ptpru
455	1.77184e-41	0.418086	0.559	0.243	4.0887e-37	Ex-7	Slc7a8
456	3.2835e-33	0.413997	0.923	0.672	7.577e-29	Ex-7	Olfm3
457	2.87771e-13	0.41043	0.698	0.639	6.64061e-09	Ex-7	Pitpnc1
458	1.11884e-35	0.408533	0.881	0.537	2.58183e-31	Ex-7	Chrm2
459	3.34116e-136	0.407466	0.338	0.028	7.71007e-132	Ex-7	Tspan11
460	8.18783e-23	0.406661	0.627	0.393	1.88942e-18	Ex-7	Prex2
461	1.51439e-19	0.406614	0.434	0.238	3.4946e-15	Ex-7	Slc24a4
462	9.68437e-34	0.406031	0.701	0.421	2.23476e-29	Ex-7	Olfm1
463	3.55947e-25	0.405712	0.9	0.721	8.21383e-21	Ex-7	Cntn3
464	8.11896e-26	0.405527	0.907	0.683	1.87353e-21	Ex-7	Adcy2
465	3.49934e-27	0.404371	0.971	0.854	8.07508e-23	Ex-7	Slc8a1
466	1.17544e-29	0.40419	0.682	0.416	2.71244e-25	Ex-7	Nsun7
467	2.32353e-28	0.4041	0.82	0.583	5.36178e-24	Ex-7	Unc13b
468	2.10044e-66	0.402554	0.428	0.103	4.84697e-62	Ex-7	Gm45352
469	2.08149e-26	0.401076	0.82	0.611	4.80325e-22	Ex-7	Sgk1
470	5.90385e-29	0.398443	0.788	0.504	1.36237e-24	Ex-7	Ptprz1
471	3.86063e-34	0.396983	0.958	0.875	8.9088e-30	Ex-7	Sorbs2
472	1.03418e-24	0.391223	0.646	0.388	2.38648e-20	Ex-7	Glp2r
473	2.90809e-45	0.389757	0.997	0.948	6.7107e-41	Ex-7	Cacna2d1
474	2.27154e-29	0.387926	0.945	0.873	5.2418e-25	Ex-7	Cttnbp2
475	1.22939e-41	0.386308	0.421	0.142	2.83694e-37	Ex-7	Fat4
476	2.71361e-34	0.385211	0.859	0.519	6.26193e-30	Ex-7	Ebf3
477	1.11422e-23	0.384641	0.907	0.745	2.57117e-19	Ex-7	Rgs7bp
478	1.80225e-27	0.383372	0.669	0.416	4.15888e-23	Ex-7	Nrp2
479	6.28115e-25	0.383357	0.99	0.938	1.44944e-20	Ex-7	Rtn1
480	3.89051e-41	0.38301	0.379	0.115	8.97775e-37	Ex-7	Fgf10
481	7.59573e-34	0.382121	0.913	0.628	1.75279e-29	Ex-7	Gm45881
482	1.71058e-21	0.38115	0.598	0.391	3.94733e-17	Ex-7	Lrrc8b
483	7.058e-33	0.378488	0.476	0.202	1.6287e-28	Ex-7	Stac
484	7.72102e-27	0.377806	0.83	0.584	1.7817e-22	Ex-7	Galnt14
485	1.29439e-38	0.377219	0.977	0.752	2.98694e-34	Ex-7	Rbms3
486	3.04287e-19	0.375412	0.537	0.331	7.02173e-15	Ex-7	Cpne5
487	7.3274e-25	0.375315	0.476	0.234	1.69087e-20	Ex-7	Tacr1
488	2.02312e-39	0.374149	0.994	0.949	4.66855e-35	Ex-7	Dlgap1
489	1.04681e-25	0.369688	0.91	0.737	2.41561e-21	Ex-7	Nyap2
490	8.29838e-26	0.36512	0.678	0.431	1.91493e-21	Ex-7	Mgat5b
491	1.22887e-36	0.364639	1	0.982	2.83573e-32	Ex-7	Adgrb3
492	1.57552e-20	0.364423	0.987	0.916	3.63566e-16	Ex-7	Tenm3
493	2.9444e-23	0.364113	0.9	0.788	6.7945e-19	Ex-7	D430041D05Rik
494	3.6455e-16	0.363512	0.669	0.502	8.41236e-12	Ex-7	Vat1l
495	1.24556e-23	0.361374	0.74	0.516	2.87425e-19	Ex-7	Mcu
496	5.39431e-31	0.360798	0.457	0.199	1.24479e-26	Ex-7	Ptgfrn
497	1.3125e-22	0.359323	0.656	0.445	3.02873e-18	Ex-7	Myo6
498	2.07239e-18	0.355314	0.627	0.386	4.78225e-14	Ex-7	Ptprk
499	1.47708e-34	0.353036	0.997	0.972	3.40852e-30	Ex-7	Gria4
500	4.82973e-25	0.352971	0.833	0.6	1.11451e-20	Ex-7	Trpc5
501	3.47808e-24	0.35279	0.547	0.293	8.02602e-20	Ex-7	4933413L06Rik
502	7.19195e-26	0.352454	0.804	0.568	1.65962e-21	Ex-7	Wscd2
503	3.33424e-13	0.350395	0.64	0.49	7.6941e-09	Ex-7	C1qtnf4
504	2.35529e-22	0.35028	0.765	0.596	5.43506e-18	Ex-7	Peak1
505	5.13921e-22	0.349527	0.444	0.226	1.18592e-17	Ex-7	Hpcal1
506	3.78085e-32	0.34858	0.402	0.147	8.72468e-28	Ex-7	Calb1
507	3.10337e-28	0.347064	0.434	0.194	7.16133e-24	Ex-7	Fam81a
508	3.87887e-11	0.34669	0.405	0.265	8.95089e-07	Ex-7	2021-03-03
509	6.37201e-23	0.344878	0.624	0.373	1.47041e-18	Ex-7	Tmcc3
510	9.17224e-47	0.342584	0.395	0.111	2.11659e-42	Ex-7	Npl
511	4.51397e-22	0.339778	0.955	0.89	1.04164e-17	Ex-7	Vsnl1
512	5.58473e-19	0.337274	0.672	0.436	1.28873e-14	Ex-7	Gm15155
513	5.40962e-27	0.335073	0.984	0.788	1.24832e-22	Ex-7	Grm1
514	5.04062e-18	0.334934	0.971	0.934	1.16317e-13	Ex-7	Gabrb1
515	4.66979e-13	0.330427	0.457	0.282	1.0776e-08	Ex-7	Maml2
516	5.14404e-18	0.328453	0.63	0.453	1.18704e-13	Ex-7	Rhobtb2
517	1.51687e-25	0.328136	0.974	0.883	3.50032e-21	Ex-7	Mtus2
518	1.57857e-17	0.328047	0.839	0.661	3.64272e-13	Ex-7	Dapk1
519	4.76841e-17	0.326913	0.463	0.263	1.10036e-12	Ex-7	Pard3b
520	6.35807e-23	0.326711	0.936	0.808	1.46719e-18	Ex-7	Fmnl2
521	2.20098e-21	0.322656	0.884	0.661	5.07899e-17	Ex-7	Cdh4
522	7.44403e-79	0.32258	0.26	0.031	1.71778e-74	Ex-7	Samd3
523	5.33635e-21	0.322035	0.476	0.257	1.23142e-16	Ex-7	Mcc
524	1.56305e-12	0.319047	0.505	0.343	3.6069e-08	Ex-7	Dpyd
525	1.29148e-20	0.319036	0.431	0.209	2.98022e-16	Ex-7	Csgalnact1
526	1.91488e-21	0.317638	0.965	0.732	4.41878e-17	Ex-7	Cep112
527	1.51887e-10	0.315745	0.55	0.406	3.50494e-06	Ex-7	Gabra5
528	1.74932e-26	0.31572	0.63	0.342	4.03674e-22	Ex-7	Gm44593
529	4.03097e-28	0.315469	0.437	0.183	9.30186e-24	Ex-7	4930438E09Rik
530	3.02909e-23	0.313628	1	1	6.98994e-19	Ex-7	Malat1
531	7.67149e-21	0.313585	0.907	0.788	1.77027e-16	Ex-7	Mkl2
532	7.16115e-19	0.312079	0.495	0.281	1.65251e-14	Ex-7	Mapk4
533	6.90361e-19	0.312038	0.399	0.209	1.59308e-14	Ex-7	AI593442
534	2.32038e-08	0.310694	0.408	0.295	0.000535451	Ex-7	Chrna7
535	1.30917e-21	0.310559	0.92	0.78	3.02103e-17	Ex-7	Camk2a
536	5.04416e-19	0.310544	0.926	0.804	1.16399e-14	Ex-7	Cdh2
537	7.66001e-15	0.310037	0.878	0.77	1.76762e-10	Ex-7	Mllt3
538	6.63383e-18	0.309547	0.559	0.365	1.53082e-13	Ex-7	Coro7
539	2.6146e-17	0.308346	0.907	0.793	6.03346e-13	Ex-7	Ank1
540	1.07721e-25	0.306989	0.997	0.977	2.48576e-21	Ex-7	Ccser1
541	2.33565e-22	0.303995	0.386	0.179	5.38975e-18	Ex-7	Prkg2
542	2.02603e-26	0.303802	0.994	0.803	4.67526e-22	Ex-7	Fam19a1
543	8.77006e-25	0.303777	0.524	0.27	2.02378e-20	Ex-7	Cacng3
544	1.86439e-36	0.302634	0.37	0.121	4.30226e-32	Ex-7	Stum
545	2.0071e-06	0.302602	0.881	0.87	0.0463158	Ex-7	Pcdh15
546	1.03502e-13	0.302479	0.595	0.44	2.38842e-09	Ex-7	Eps15
547	4.46219e-17	0.302384	0.553	0.359	1.02969e-12	Ex-7	Fam49a
548	7.59971e-46	0.301829	0.711	0.271	1.75371e-41	Ex-7	Sox6
549	6.67791e-93	0.301451	0.203	0.013	1.54099e-88	Ex-7	Them7
550	3.32298e-15	0.300591	0.415	0.235	7.66812e-11	Ex-7	Gm13944
551	6.17278e-100	1.27909	0.793	0.271	1.42443e-95	Ex-5	Sox6
552	7.94286e-68	1.13878	0.831	0.433	1.8329e-63	Ex-5	Adarb2
553	4.67617e-83	1.09943	0.724	0.236	1.07907e-78	Ex-5	Megf11
554	5.46925e-24	0.863204	0.448	0.218	1.26208e-19	Ex-5	Pde1c
555	9.76418e-52	0.824891	0.559	0.204	2.25318e-47	Ex-5	Csgalnact1
556	6.02521e-75	0.775443	0.793	0.288	1.39038e-70	Ex-5	Zeb2
557	5.73465e-61	0.773614	0.805	0.344	1.32333e-56	Ex-5	Lhfp
558	6.75368e-81	0.73966	0.954	0.397	1.55848e-76	Ex-5	Rorb
559	1.67285e-39	0.697956	0.839	0.666	3.86027e-35	Ex-5	Cdh4
560	2.47473e-62	0.680849	1	0.798	5.71068e-58	Ex-5	Cdh13
561	2.30755e-57	0.663991	0.774	0.35	5.32491e-53	Ex-5	Col26a1
562	4.64041e-42	0.661523	0.766	0.459	1.07082e-37	Ex-5	Arhgap6
563	1.37128e-43	0.654849	0.939	0.637	3.16437e-39	Ex-5	Egfem1
564	7.18465e-42	0.643744	0.881	0.63	1.65793e-37	Ex-5	Syt7
565	2.55364e-41	0.640589	0.935	0.715	5.89277e-37	Ex-5	Spock1
566	1.64778e-38	0.639656	0.751	0.443	3.80242e-34	Ex-5	Grik3
567	5.22358e-45	0.563821	0.992	0.835	1.20539e-40	Ex-5	Elmo1
568	2.66932e-32	0.544796	0.927	0.69	6.15972e-28	Ex-5	Alk
569	7.97069e-17	0.540624	0.567	0.374	1.83932e-12	Ex-5	Thsd4
570	2.674e-35	0.521292	0.977	0.706	6.17052e-31	Ex-5	Gpc6
571	5.34623e-34	0.513124	0.981	0.934	1.2337e-29	Ex-5	Kcnip4
572	1.4994e-52	0.50772	0.67	0.245	3.46001e-48	Ex-5	Prmt8
573	8.72685e-36	0.503509	0.939	0.587	2.01381e-31	Ex-5	Lef1
574	7.81976e-36	0.500785	0.889	0.609	1.80449e-31	Ex-5	Itpr1
575	3.78281e-35	0.500553	0.77	0.468	8.72922e-31	Ex-5	Camkv
576	4.74362e-25	0.492696	0.927	0.872	1.09464e-20	Ex-5	Ephb1
577	1.33052e-29	0.484724	0.851	0.647	3.07031e-25	Ex-5	Ppm1h
578	4.92615e-28	0.484316	0.893	0.68	1.13676e-23	Ex-5	Nell2
579	3.42702e-34	0.476715	0.448	0.166	7.9082e-30	Ex-5	Gm15261
580	1.07935e-35	0.47508	0.759	0.377	2.49072e-31	Ex-5	Prkd1
581	7.16158e-33	0.473992	0.943	0.639	1.65261e-28	Ex-5	Ebf1
582	4.56988e-32	0.468499	0.989	0.895	1.05455e-27	Ex-5	Pam
583	2.75666e-25	0.467412	0.874	0.595	6.36128e-21	Ex-5	Gm28928
584	3.14683e-17	0.465747	0.115	0.025	7.26161e-13	Ex-5	Hpse2
585	3.42008e-24	0.461857	0.448	0.194	7.89218e-20	Ex-5	9530026P05Rik
586	4.15538e-35	0.457759	0.996	0.859	9.58895e-31	Ex-5	Robo2
587	1.215e-34	0.457232	0.636	0.302	2.80372e-30	Ex-5	Myo1b
588	1.98018e-24	0.448203	0.923	0.787	4.56946e-20	Ex-5	Ttc28
589	3.56569e-28	0.444698	0.831	0.582	8.22818e-24	Ex-5	Nos1ap
590	1.13702e-34	0.44327	0.985	0.844	2.6238e-30	Ex-5	Slc24a3
591	1.19865e-68	0.434518	0.41	0.081	2.76601e-64	Ex-5	Gm45025
592	9.43503e-34	0.4327	0.87	0.522	2.17723e-29	Ex-5	Ebf3
593	4.02446e-43	0.430231	0.594	0.226	9.28684e-39	Ex-5	Sel1l3
594	3.95027e-28	0.423219	0.939	0.696	9.11565e-24	Ex-5	Luzp2
595	7.82044e-29	0.422483	0.839	0.588	1.80464e-24	Ex-5	Dgkh
596	1.83312e-23	0.420431	0.609	0.36	4.2301e-19	Ex-5	Bicc1
597	1.51332e-34	0.412911	0.743	0.329	3.49213e-30	Ex-5	Bnc2
598	2.59685e-07	0.411165	0.69	0.593	0.00599249	Ex-5	Gpc5
599	4.1545e-26	0.410113	0.977	0.782	9.58692e-22	Ex-5	Chrm3
600	1.20276e-17	0.408069	0.345	0.151	2.7755e-13	Ex-5	Npsr1
601	1.56527e-08	0.406017	0.789	0.675	0.000361202	Ex-5	Clstn2
602	1.27745e-25	0.405887	0.674	0.387	2.94784e-21	Ex-5	Vstm2l
603	1.04653e-39	0.399646	0.391	0.11	2.41497e-35	Ex-5	Pde5a
604	8.34565e-24	0.396113	0.59	0.318	1.92584e-19	Ex-5	Gm32036
605	3.10969e-27	0.392258	0.989	0.912	7.17592e-23	Ex-5	Slc35f1
606	1.13326e-27	0.388669	0.548	0.267	2.6151e-23	Ex-5	Trpc3
607	3.81671e-54	0.386282	0.218	0.029	8.80743e-50	Ex-5	Npffr2
608	2.23922e-31	0.384282	1	0.944	5.16722e-27	Ex-5	Lhfpl3
609	3.735e-22	0.383321	0.916	0.781	8.61888e-18	Ex-5	Dock4
610	1.06672e-25	0.376464	0.95	0.848	2.46156e-21	Ex-5	Apbb2
611	1.50456e-23	0.374637	0.54	0.271	3.47193e-19	Ex-5	Cacng3
612	6.98615e-36	0.370985	0.238	0.05	1.61212e-31	Ex-5	Ccdc141
613	4.59733e-22	0.368207	0.981	0.913	1.06088e-17	Ex-5	Ptprg
614	4.96923e-22	0.36687	0.923	0.749	1.1467e-17	Ex-5	A830018L16Rik
615	1.14479e-14	0.361804	0.682	0.489	2.64171e-10	Ex-5	Sncaip
616	9.05635e-19	0.360763	0.651	0.403	2.08984e-14	Ex-5	Pdzd2
617	1.44829e-25	0.360408	0.985	0.855	3.34207e-21	Ex-5	Atp8a1
618	8.00515e-11	0.359512	0.287	0.149	1.84727e-06	Ex-5	Rbm20
619	4.70701e-32	0.358893	0.571	0.248	1.08619e-27	Ex-5	Gabra4
620	1.5123e-25	0.358607	0.686	0.4	3.48979e-21	Ex-5	Gabra5
621	1.18021e-22	0.355972	0.766	0.462	2.72344e-18	Ex-5	Man1a
622	2.06708e-29	0.348989	0.303	0.089	4.77e-25	Ex-5	Dkk2
623	4.36134e-12	0.348407	0.789	0.686	1.00642e-07	Ex-5	Calm1
624	1.17851e-18	0.346262	0.414	0.205	2.71952e-14	Ex-5	Npas2
625	7.89936e-18	0.341491	0.851	0.698	1.82286e-13	Ex-5	Mtss1
626	1.47719e-20	0.341422	0.318	0.122	3.40876e-16	Ex-5	Synpo2
627	1.86117e-21	0.339416	0.969	0.744	4.29483e-17	Ex-5	Dscaml1
628	2.44795e-06	0.337933	0.398	0.287	0.056489	Ex-5	4921534H16Rik
629	4.70448e-19	0.33755	0.644	0.4	1.08561e-14	Ex-5	Mical2
630	6.10109e-56	0.336731	0.31	0.056	1.40789e-51	Ex-5	Plscr4
631	4.85816e-18	0.336264	0.946	0.877	1.12107e-13	Ex-5	Sorbs2
632	4.25301e-33	0.333415	1	0.947	9.81425e-29	Ex-5	Cacna1d
633	1.60337e-18	0.333291	0.92	0.772	3.69994e-14	Ex-5	Hs3st5
634	3.46724e-12	0.328709	0.594	0.394	8.00101e-08	Ex-5	Glp2r
635	8.89101e-29	0.328088	0.268	0.074	2.05169e-24	Ex-5	St3gal1
636	1.13972e-10	0.325191	0.203	0.089	2.63002e-06	Ex-5	Gm28376
637	5.73669e-22	0.324773	0.893	0.65	1.3238e-17	Ex-5	Cdh12
638	1.40291e-24	0.323604	0.989	0.781	3.23734e-20	Ex-5	Nell1
639	2.08529e-24	0.322568	0.72	0.383	4.81201e-20	Ex-5	Ptprk
640	4.42903e-20	0.321845	0.686	0.429	1.02204e-15	Ex-5	Grk3
641	1.73493e-22	0.320487	0.985	0.848	4.00353e-18	Ex-5	Sgcd
642	3.89195e-30	0.317819	0.962	0.697	8.98105e-26	Ex-5	Hcn1
643	5.96266e-17	0.317084	0.579	0.331	1.37594e-12	Ex-5	Cpne5
644	1.48967e-18	0.315654	0.352	0.15	3.43757e-14	Ex-5	Gda
645	1.24445e-18	0.314828	0.471	0.247	2.8717e-14	Ex-5	Runx2
646	2.30023e-17	0.31413	0.946	0.85	5.30801e-13	Ex-5	Gabbr2
647	9.65678e-19	0.3126	0.774	0.495	2.2284e-14	Ex-5	Slit2
648	1.31083e-44	0.312228	0.268	0.053	3.02487e-40	Ex-5	Kcns3
649	1.8105e-29	0.310022	0.421	0.151	4.17791e-25	Ex-5	Hgf
650	2.00107e-27	0.3092	0.559	0.246	4.61767e-23	Ex-5	Adamtsl1
651	5.48453e-29	0.308333	1	0.971	1.26561e-24	Ex-5	Opcml
652	5.38585e-22	0.307856	1	0.95	1.24284e-17	Ex-5	Tenm4
653	9.762e-15	0.306573	0.697	0.491	2.25268e-10	Ex-5	Gm15478
654	1.04484e-27	0.304552	0.352	0.119	2.41108e-23	Ex-5	Nos1
655	3.64292e-18	0.300793	0.92	0.734	8.4064e-14	Ex-5	Gramd1b
656	6.55332e-22	0.299874	0.989	0.921	1.51225e-17	Ex-5	Prickle1
657	5.2754e-13	0.298506	0.824	0.655	1.21735e-08	Ex-5	Cachd1
658	5.63864e-08	0.295971	0.808	0.733	0.00130117	Ex-5	Tshz2
659	6.14128e-15	0.294216	0.793	0.587	1.41716e-10	Ex-5	Unc13b
660	4.72162e-15	0.292742	0.713	0.48	1.08956e-10	Ex-5	Nrp1
661	5.13185e-14	0.292335	0.958	0.86	1.18423e-09	Ex-5	Grin2a
662	2.33407e-17	0.291407	0.95	0.78	5.3861e-13	Ex-5	Camk2a
663	1.54109e-19	0.29107	0.613	0.346	3.55622e-15	Ex-5	Klhl5
664	1.0911e-17	0.290861	0.966	0.855	2.51783e-13	Ex-5	Slc8a1
665	7.73014e-15	0.290696	0.479	0.272	1.78381e-10	Ex-5	Parm1
666	3.94472e-19	0.28747	0.992	0.907	9.10284e-15	Ex-5	Kcnb2
667	1.82433e-10	0.286402	0.824	0.69	4.20983e-06	Ex-5	Adcy2
668	7.55244e-15	0.285963	0.268	0.114	1.7428e-10	Ex-5	Aff1
669	3.92616e-09	0.285502	0.759	0.61	9.06e-05	Ex-5	Gm26883
670	2.00922e-12	0.283515	0.613	0.424	4.63648e-08	Ex-5	Cplx2
671	2.18671e-16	0.281869	0.966	0.895	5.04606e-12	Ex-5	Epb41l3
672	1.84524e-12	0.280371	0.805	0.632	4.25807e-08	Ex-5	Gtdc1
673	1.15909e-18	0.279592	0.276	0.105	2.67472e-14	Ex-5	Igfbp5
674	5.02168e-20	0.278293	0.996	0.863	1.1588e-15	Ex-5	Fam19a2
675	5.31026e-19	0.277991	0.946	0.737	1.2254e-14	Ex-5	Tspan5
676	5.7988e-13	0.275047	0.433	0.248	1.33813e-08	Ex-5	Slc4a4
677	7.56828e-19	0.275023	0.586	0.336	1.74646e-14	Ex-5	Amotl1
678	4.33324e-14	0.273013	0.571	0.353	9.99939e-10	Ex-5	Gm16351
679	1.44343e-11	0.271445	0.613	0.432	3.33086e-07	Ex-5	Bcl2
680	2.58026e-23	0.271085	0.337	0.126	5.95421e-19	Ex-5	Stum
681	2.12001e-15	0.268689	0.946	0.848	4.89213e-11	Ex-5	Rbfox3
682	6.11632e-17	0.268315	0.483	0.265	1.4114e-12	Ex-5	Ptk7
683	1.86423e-13	0.267268	0.785	0.616	4.3019e-09	Ex-5	Sgk1
684	6.12262e-22	0.266914	0.69	0.391	1.41286e-17	Ex-5	Ajap1
685	1.43051e-13	0.266635	0.927	0.751	3.30104e-09	Ex-5	Ldb2
686	3.88264e-12	0.266371	0.467	0.285	8.95957e-08	Ex-5	Pcp4
687	4.70725e-15	0.265906	0.943	0.736	1.08625e-10	Ex-5	Cep112
688	9.17824e-24	0.263736	1	0.988	2.11797e-19	Ex-5	Tenm2
689	2.22247e-10	0.263205	0.628	0.473	5.12856e-06	Ex-5	Man2a1
690	2.12963e-10	0.262028	0.594	0.424	4.91433e-06	Ex-5	Nsun7
691	1.08922e-06	0.261352	0.452	0.323	0.0251348	Ex-5	Gas7
692	3.80321e-11	0.261164	0.452	0.281	8.77629e-07	Ex-5	Nek7
693	1.46613e-14	0.260568	0.739	0.505	3.38325e-10	Ex-5	Chsy3
694	7.42705e-13	0.260218	0.701	0.54	1.71387e-08	Ex-5	Sorbs2os
695	1.22275e-15	0.259918	0.295	0.124	2.82163e-11	Ex-5	AC124490.1
696	2.0631e-22	0.257187	0.421	0.18	4.76082e-18	Ex-5	Npnt
697	3.33982e-12	0.256797	0.816	0.664	7.70696e-08	Ex-5	Dlgap4
698	2.11321e-24	0.256208	1	0.968	4.87645e-20	Ex-5	Gabrb3
699	2.35949e-13	0.255386	0.414	0.231	5.44476e-09	Ex-5	Nptx1
700	1.04206e-09	0.254283	0.628	0.462	2.40465e-05	Ex-5	Lmo3
701	1.38763e-12	0.253582	0.655	0.453	3.20211e-08	Ex-5	Tcerg1l
702	2.22593e-20	0.252091	0.245	0.081	5.13655e-16	Ex-5	Pparg
703	1.00491e-12	0.250152	0.379	0.21	2.31893e-08	Ex-5	Shisa3
704	4.09854e-17	0.249713	0.264	0.101	9.4578e-13	Ex-5	Traip
705	5.12339e-12	0.249161	0.586	0.384	1.18227e-07	Ex-5	Rerg
706	1.42063e-11	0.248633	0.567	0.395	3.27825e-07	Ex-5	Lrrc8b
707	1.28772e-12	0.24793	0.973	0.906	2.97154e-08	Ex-5	Pcsk2
708	2.44579e-12	0.246582	0.939	0.846	5.64391e-08	Ex-5	Plcb1
709	8.88769e-10	0.244915	0.996	0.916	2.05092e-05	Ex-5	Tenm3
710	1.80358e-10	0.244562	0.636	0.451	4.16193e-06	Ex-5	Slit1
711	0.000163001	0.243391	0.287	0.2	1	Ex-5	Meis1
712	7.94079e-09	0.24031	0.464	0.302	0.000183242	Ex-5	Utrn
713	5.38313e-12	0.240245	0.701	0.488	1.24221e-07	Ex-5	Vwc2
714	1.20512e-18	0.237629	0.352	0.149	2.78093e-14	Ex-5	Fat4
715	5.95137e-10	0.237529	0.632	0.481	1.37334e-05	Ex-5	Nrn1
716	5.62122e-09	0.236041	0.613	0.452	0.000129715	Ex-5	Dlgap3
717	1.6838e-12	0.235646	0.444	0.259	3.88554e-08	Ex-5	Lrrc8c
718	2.01038e-20	0.235539	0.238	0.075	4.63915e-16	Ex-5	Mgmt
719	2.45492e-11	0.235182	0.441	0.26	5.66498e-07	Ex-5	Tox3
720	2.13785e-08	0.234824	0.598	0.441	0.000493331	Ex-5	Eps15
721	8.17856e-11	0.234488	0.912	0.81	1.88728e-06	Ex-5	Fmnl2
722	4.05409e-07	0.234386	0.456	0.33	0.00935522	Ex-5	Nefm
723	6.72743e-11	0.233763	0.858	0.748	1.55242e-06	Ex-5	Ppp2r5c
724	7.81871e-12	0.230608	0.498	0.311	1.80424e-07	Ex-5	Plch2
725	7.15374e-12	0.230431	0.881	0.734	1.6508e-07	Ex-5	Gm15738
726	2.63132e-11	0.229935	0.9	0.727	6.07203e-07	Ex-5	Ptprr
727	4.94237e-10	0.229444	0.556	0.391	1.1405e-05	Ex-5	2021-09-04
728	6.41503e-12	0.228584	0.935	0.837	1.48033e-07	Ex-5	Arid1b
729	5.99792e-13	0.228347	0.529	0.322	1.38408e-08	Ex-5	Cpne9
730	4.77416e-11	0.223138	0.912	0.773	1.10168e-06	Ex-5	Pde8b
731	1.87823e-09	0.222649	0.364	0.211	4.33419e-05	Ex-5	Stac
732	2.29516e-10	0.222108	0.383	0.221	5.29631e-06	Ex-5	P3h2
733	5.83761e-15	0.222059	0.368	0.179	1.34709e-10	Ex-5	Akain1
734	1.72457e-10	0.221508	0.9	0.789	3.97963e-06	Ex-5	Magi3
735	1.97446e-07	0.219983	0.621	0.485	0.00455626	Ex-5	Mark1
736	1.70359e-09	0.219691	0.513	0.359	3.93121e-05	Ex-5	1110004F10Rik
737	4.69551e-09	0.218751	0.678	0.493	0.000108354	Ex-5	Dock10
738	2.69098e-09	0.218002	0.87	0.773	6.20971e-05	Ex-5	Calm2
739	6.33775e-12	0.21644	0.973	0.923	1.4625e-07	Ex-5	Osbpl9
740	1.19283e-10	0.21631	0.54	0.362	2.75257e-06	Ex-5	Fam49a
741	1.72787e-19	0.215654	0.264	0.093	3.98724e-15	Ex-5	Fam20a
742	4.75752e-10	0.215252	0.966	0.873	1.09784e-05	Ex-5	Cttnbp2
743	3.13972e-19	0.215131	1	0.982	7.24522e-15	Ex-5	Dpp6
744	1.84364e-13	0.214243	0.87	0.686	4.25438e-09	Ex-5	Hs6st3
745	3.11744e-12	0.213576	0.985	0.932	7.1938e-08	Ex-5	Ntrk3
746	7.4183e-09	0.213004	0.261	0.138	0.000171185	Ex-5	Cck
747	4.45423e-10	0.210899	0.866	0.744	1.02786e-05	Ex-5	Galnt17
748	2.59848e-16	0.210817	0.544	0.296	5.99624e-12	Ex-5	4933413L06Rik
749	1.96166e-13	0.210643	0.418	0.227	4.52672e-09	Ex-5	Epha8
750	3.71843e-10	0.210234	0.866	0.725	8.58065e-06	Ex-5	Frmd4b
751	4.35043e-256	1.21064	0.882	0.112	1.0039e-251	Ex-4	Gli3
752	4.10969e-95	1.05689	0.949	0.418	9.48352e-91	Ex-4	A330008L17Rik
753	3.24008e-83	0.874914	1	0.712	7.47682e-79	Ex-4	Cdh8
754	1.07892e-73	0.862358	0.969	0.537	2.48972e-69	Ex-4	Chrm2
755	1.31635e-240	0.848213	0.535	0.034	3.03761e-236	Ex-4	Gm43824
756	2.82091e-77	0.846873	0.937	0.449	6.50953e-73	Ex-4	Grik1
757	3.64963e-82	0.829759	0.992	0.754	8.42188e-78	Ex-4	Rbms3
758	1.83382e-72	0.815628	0.996	0.806	4.23172e-68	Ex-4	Fam19a1
759	4.45824e-73	0.805123	0.992	0.687	1.02878e-68	Ex-4	Hs3st4
760	0	0.788553	0.665	0.014	0	Ex-4	Pitx2
761	6.77295e-128	0.7815	0.646	0.125	1.56293e-123	Ex-4	Foxp4
762	6.97286e-55	0.74606	0.953	0.673	1.60906e-50	Ex-4	Olfm3
763	4.11363e-48	0.727386	0.969	0.783	9.49262e-44	Ex-4	Rgs6
764	1.04565e-58	0.71011	0.949	0.53	2.41293e-54	Ex-4	Htr2c
765	5.74854e-46	0.659044	0.961	0.698	1.32653e-41	Ex-4	Fstl5
766	1.85274e-90	0.631167	0.591	0.131	4.27538e-86	Ex-4	9330158H04Rik
767	1.04737e-55	0.629952	0.937	0.587	2.41692e-51	Ex-4	Pcdh10
768	9.87759e-54	0.629878	0.957	0.596	2.27935e-49	Ex-4	Sema6d
769	1.4343e-56	0.611154	0.988	0.886	3.30978e-52	Ex-4	Plcb4
770	1.73963e-48	0.602912	0.937	0.624	4.01437e-44	Ex-4	Trps1
771	4.81965e-58	0.594287	0.823	0.372	1.11218e-53	Ex-4	Slc6a1
772	8.58746e-177	0.575338	0.524	0.048	1.98164e-172	Ex-4	Pmfbp1
773	1.8412e-44	0.560828	0.862	0.479	4.24875e-40	Ex-4	Vwc2
774	1.42833e-74	0.555399	0.563	0.135	3.296e-70	Ex-4	Ror2
775	6.75508e-51	0.549529	0.969	0.558	1.5588e-46	Ex-4	Pcdh11x
776	2.35943e-54	0.538656	1	0.91	5.44462e-50	Ex-4	Dcc
777	1.40236e-41	0.532038	0.925	0.627	3.2361e-37	Ex-4	Elavl2
778	2.66038e-34	0.527875	0.835	0.504	6.13909e-30	Ex-4	Plcxd3
779	3.00753e-50	0.519037	1	0.907	6.94018e-46	Ex-4	Kcnb2
780	2.48845e-39	0.518753	0.417	0.129	5.74235e-35	Ex-4	Cck
781	2.45819e-43	0.516535	0.843	0.459	5.67252e-39	Ex-4	Cdh11
782	6.69745e-59	0.506862	0.638	0.204	1.5455e-54	Ex-4	Lncenc1
783	1.01506e-22	0.494245	0.728	0.464	2.34236e-18	Ex-4	Man1a
784	1.55704e-60	0.488413	0.654	0.212	3.59303e-56	Ex-4	Gsg1l
785	2.59041e-31	0.487433	0.953	0.713	5.97763e-27	Ex-4	Unc13c
786	7.69513e-91	0.486722	0.433	0.067	1.77573e-86	Ex-4	Syt17
787	7.96112e-40	0.481063	0.992	0.8	1.83711e-35	Ex-4	Plxna4
788	6.9103e-42	0.477353	0.972	0.628	1.59462e-37	Ex-4	Gm45881
789	7.27138e-30	0.476418	0.949	0.728	1.67794e-25	Ex-4	Etl4
790	6.04841e-24	0.473826	0.571	0.32	1.39573e-19	Ex-4	Lypd6b
791	2.43205e-32	0.472588	0.933	0.667	5.6122e-28	Ex-4	Clstn2
792	3.82684e-26	0.469011	0.941	0.662	8.83083e-22	Ex-4	Npas3
793	1.81136e-25	0.468366	0.724	0.438	4.1799e-21	Ex-4	Serpini1
794	1.78514e-24	0.461283	0.976	0.918	4.11938e-20	Ex-4	Grik2
795	9.16067e-32	0.460631	0.992	0.902	2.11392e-27	Ex-4	Fat3
796	5.2807e-81	0.454712	0.354	0.051	1.21858e-76	Ex-4	Fam163a
797	5.14304e-19	0.446672	0.535	0.286	1.18681e-14	Ex-4	Hs3st2
798	2.82792e-36	0.444742	0.705	0.342	6.52571e-32	Ex-4	Sntg2
799	3.65687e-39	0.436027	0.524	0.202	8.43859e-35	Ex-4	Kcna4
800	9.78845e-23	0.435925	0.965	0.836	2.25878e-18	Ex-4	Gabrg3
801	6.89159e-14	0.435351	0.539	0.357	1.5903e-09	Ex-4	Ntng2
802	8.91009e-28	0.431375	0.567	0.273	2.05609e-23	Ex-4	Osbpl3
803	6.02619e-34	0.418285	0.496	0.191	1.3906e-29	Ex-4	Rarb
804	1.16479e-18	0.414681	0.862	0.697	2.68787e-14	Ex-4	Adgrl2
805	2.64015e-23	0.409071	0.835	0.583	6.09241e-19	Ex-4	Mpped2
806	8.19432e-34	0.40372	1	0.94	1.89092e-29	Ex-4	Pbx1
807	2.39119e-33	0.399938	0.638	0.284	5.5179e-29	Ex-4	Fras1
808	2.37683e-19	0.39694	0.764	0.524	5.48478e-15	Ex-4	Foxp1
809	9.53464e-28	0.392797	0.768	0.432	2.20021e-23	Ex-4	Cpne4
810	2.60992e-33	0.392247	0.571	0.241	6.02266e-29	Ex-4	4930447C04Rik
811	3.36746e-38	0.391209	0.591	0.229	7.77074e-34	Ex-4	Col11a1
812	2.29019e-29	0.389676	0.803	0.493	5.28485e-25	Ex-4	Sh3d19
813	6.33333e-20	0.388508	0.717	0.456	1.46148e-15	Ex-4	Scg2
814	8.97868e-31	0.388477	0.98	0.802	2.07192e-26	Ex-4	Setbp1
815	1.07373e-08	0.386086	0.673	0.553	0.000247773	Ex-4	Ptprm
816	2.7613e-18	0.37635	0.78	0.584	6.37196e-14	Ex-4	Gab2
817	8.03601e-33	0.36586	0.622	0.271	1.85439e-28	Ex-4	Trpc7
818	6.32803e-12	0.364616	0.823	0.689	1.46026e-07	Ex-4	Slc35f4
819	9.59388e-25	0.361956	0.618	0.307	2.21388e-20	Ex-4	Plpp4
820	1.27131e-21	0.360866	0.677	0.386	2.93368e-17	Ex-4	Trhde
821	1.07316e-20	0.357828	0.831	0.563	2.47643e-16	Ex-4	Fnbp1l
822	6.96234e-14	0.357244	0.634	0.412	1.60663e-09	Ex-4	St6galnac5
823	2.6448e-16	0.353924	0.783	0.554	6.10314e-12	Ex-4	Epha7
824	2.14812e-14	0.351903	0.315	0.144	4.95699e-10	Ex-4	Sema3c
825	3.75967e-21	0.351374	0.693	0.411	8.67582e-17	Ex-4	B230217J21Rik
826	0.00774473	0.350018	0.681	0.683	1	Ex-4	Sorcs1
827	1.55119e-22	0.343972	0.5	0.241	3.57953e-18	Ex-4	Col16a1
828	4.21692e-21	0.340187	0.965	0.765	9.73097e-17	Ex-4	Nova1
829	1.95638e-19	0.337438	0.87	0.677	4.51453e-15	Ex-4	Fut8
830	2.55735e-22	0.335563	0.583	0.302	5.90134e-18	Ex-4	Cpne8
831	3.5662e-37	0.334793	0.516	0.179	8.22935e-33	Ex-4	Plch1
832	3.09062e-29	0.334643	0.728	0.36	7.13191e-25	Ex-4	Necab1
833	2.57112e-24	0.333323	0.874	0.584	5.93312e-20	Ex-4	Galnt14
834	8.64955e-24	0.329191	0.622	0.317	1.99597e-19	Ex-4	Cpne9
835	1.4228e-10	0.329018	0.256	0.125	3.28324e-06	Ex-4	Fgf10
836	5.22869e-21	0.327464	0.909	0.74	1.20657e-16	Ex-4	Zfp462
837	7.14961e-32	0.322841	0.524	0.207	1.64984e-27	Ex-4	Onecut2
838	5.09423e-25	0.322737	0.976	0.83	1.17554e-20	Ex-4	Msi2
839	1.30899e-20	0.319168	0.937	0.831	3.02064e-16	Ex-4	Ogt
840	1.21905e-22	0.318734	0.571	0.288	2.81308e-18	Ex-4	Neto2
841	9.23392e-17	0.318548	0.894	0.729	2.13082e-12	Ex-4	Mir124-2hg
842	5.73735e-11	0.317896	0.744	0.57	1.32395e-06	Ex-4	Pigk
843	2.07808e-20	0.31775	0.835	0.584	4.79537e-16	Ex-4	Diaph2
844	3.84166e-20	0.316524	0.594	0.331	8.86502e-16	Ex-4	Fndc5
845	1.86485e-24	0.313992	0.547	0.261	4.30332e-20	Ex-4	Pde1b
846	4.16516e-17	0.312803	0.764	0.523	9.61152e-13	Ex-4	Srrm4
847	1.5358e-05	0.31035	0.606	0.505	0.354402	Ex-4	Sorcs3
848	6.58328e-17	0.310289	0.894	0.725	1.51916e-12	Ex-4	Atp2b1
849	2.58005e-29	0.309241	0.331	0.103	5.95373e-25	Ex-4	Pcsk6
850	5.88873e-28	0.309087	0.579	0.264	1.35888e-23	Ex-4	Nectin3
851	1.66625e-26	0.308485	0.819	0.44	3.84505e-22	Ex-4	Grik3
852	1.61487e-23	0.307241	0.417	0.168	3.72647e-19	Ex-4	Hunk
853	8.84839e-19	0.306686	0.713	0.45	2.04185e-14	Ex-4	Slc6a7
854	1.99655e-18	0.306574	0.689	0.402	4.60723e-14	Ex-4	Pcdh19
855	4.72768e-11	0.304897	0.642	0.462	1.09096e-06	Ex-4	Cacna2d3
856	4.34254e-09	0.303158	0.543	0.395	0.000100208	Ex-4	Stmn1
857	1.32708e-24	0.301494	1	0.929	3.06237e-20	Ex-4	Rmst
858	1.5782e-10	0.301072	0.705	0.518	3.64186e-06	Ex-4	Mef2c
859	1.75874e-17	0.300408	0.886	0.678	4.05848e-13	Ex-4	Ncald
860	8.79886e-128	0.296908	0.319	0.022	2.03042e-123	Ex-4	Uncx
861	1.12183e-08	0.295181	0.878	0.788	0.000258873	Ex-4	Chrm3
862	2.54748e-15	0.294609	0.843	0.608	5.87858e-11	Ex-4	Slc9a9
863	3.57187e-16	0.293261	0.961	0.857	8.24244e-12	Ex-4	Atp8a1
864	1.00633e-16	0.291184	0.949	0.713	2.32221e-12	Ex-4	Edil3
865	4.56392e-21	0.289187	0.516	0.256	1.05317e-16	Ex-4	Gm28050
866	1.0818e-21	0.287956	1	0.984	2.49637e-17	Ex-4	Ctnna2
867	2.113e-11	0.283805	0.917	0.78	4.87595e-07	Ex-4	Klhl29
868	1.25891e-16	0.283772	0.972	0.791	2.90507e-12	Ex-4	Brinp3
869	9.70533e-45	0.282615	0.256	0.046	2.2396e-40	Ex-4	Vcan
870	1.01351e-16	0.282349	0.866	0.664	2.33878e-12	Ex-4	Slco3a1
871	2.25751e-18	0.277307	0.992	0.947	5.20943e-14	Ex-4	Cacna1d
872	6.95117e-23	0.276541	0.551	0.254	1.60405e-18	Ex-4	Tox3
873	3.52925e-20	0.276028	0.972	0.836	8.14409e-16	Ex-4	Elmo1
874	5.15443e-185	0.275396	0.272	0.006	1.18944e-180	Ex-4	Sall1
875	1.8753e-11	0.275131	0.988	0.864	4.32744e-07	Ex-4	Epha6
876	1.96171e-16	0.274934	0.736	0.489	4.52684e-12	Ex-4	Gm15478
877	9.75946e-20	0.272054	0.618	0.329	2.25209e-15	Ex-4	Cpne5
878	3.8111e-14	0.270898	0.803	0.637	8.79449e-10	Ex-4	Cacna2d2
879	6.58257e-18	0.270624	0.984	0.921	1.51899e-13	Ex-4	Large1
880	8.28337e-18	0.269383	0.996	0.946	1.91147e-13	Ex-4	Sgcz
881	5.20117e-08	0.269213	0.256	0.14	0.00120022	Ex-4	Chn2
882	1.10648e-77	0.261815	0.252	0.025	2.55332e-73	Ex-4	Fibcd1
883	2.6631e-12	0.258499	0.319	0.158	6.14536e-08	Ex-4	Lypd6
884	4.33334e-17	0.257354	0.839	0.525	9.99962e-13	Ex-4	Ebf3
885	2.89986e-43	0.255768	0.248	0.044	6.69173e-39	Ex-4	Abtb2
886	2.16423e-15	0.25087	0.63	0.39	4.99418e-11	Ex-4	Gm14211
887	9.63437e-72	0.250007	0.181	0.013	2.22323e-67	Ex-4	2610028E06Rik
888	5.85956e-19	0.247394	0.756	0.446	1.35215e-14	Ex-4	Bcl11b
889	3.70034e-27	0.24738	0.327	0.102	8.53891e-23	Ex-4	Igfbp5
890	1.99567e-10	0.246197	0.697	0.486	4.6052e-06	Ex-4	Uchl1
891	1.50246e-16	0.245657	0.276	0.107	3.46707e-12	Ex-4	Ccnd2
892	1.14261e-30	0.24431	0.26	0.064	2.63669e-26	Ex-4	Npas1
893	3.86999e-17	0.243387	0.913	0.589	8.93039e-13	Ex-4	Lef1
894	7.43026e-15	0.243009	0.972	0.887	1.71461e-10	Ex-4	Csmd2
895	4.77833e-17	0.243006	0.854	0.607	1.10265e-12	Ex-4	Grm3
896	3.81654e-11	0.242974	0.323	0.171	8.80704e-07	Ex-4	Frmpd1
897	3.38761e-31	0.241086	0.264	0.066	7.81726e-27	Ex-4	Igf1
898	1.1471e-13	0.238443	0.602	0.374	2.64704e-09	Ex-4	Cacna1i
899	1.70561e-23	0.237616	0.618	0.293	3.93586e-19	Ex-4	Tfap2d
900	3.78752e-14	0.237592	0.819	0.589	8.74007e-10	Ex-4	Epha4
901	1.39145e-15	0.236264	0.984	0.866	3.21092e-11	Ex-4	Ssbp2
902	1.95858e-13	0.235913	0.669	0.434	4.51961e-09	Ex-4	Ankrd44
903	5.20865e-15	0.234313	0.591	0.341	1.20195e-10	Ex-4	Mpdz
904	6.46713e-15	0.232238	0.992	0.941	1.49235e-10	Ex-4	Dmd
905	4.81711e-16	0.232205	0.441	0.226	1.1116e-11	Ex-4	Ccdc88c
906	1.23355e-18	0.232201	0.575	0.296	2.84655e-14	Ex-4	Syt6
907	2.75496e-12	0.228762	1	0.964	6.35735e-08	Ex-4	Ralyl
908	3.84643e-12	0.228614	0.642	0.425	8.87603e-08	Ex-4	Hmgn3
909	2.61093e-13	0.227878	0.661	0.438	6.02499e-09	Ex-4	Las1l
910	8.49923e-26	0.227433	0.28	0.083	1.96128e-21	Ex-4	Bcar3
911	1.40458e-16	0.22738	0.37	0.17	3.2412e-12	Ex-4	Ppp1r14b
912	7.80181e-16	0.226641	0.394	0.193	1.80035e-11	Ex-4	Pmepa1
913	3.67248e-25	0.226426	0.228	0.059	8.47461e-21	Ex-4	Ltbp1
914	4.03423e-15	0.226374	0.394	0.19	9.30938e-11	Ex-4	Rasa4
915	2.85207e-12	0.226215	0.78	0.558	6.58143e-08	Ex-4	Tln2
916	4.00001e-18	0.225939	1	0.986	9.23043e-14	Ex-4	Fam155a
917	1.20127e-09	0.224661	0.921	0.812	2.77205e-05	Ex-4	Atp1b1
918	1.90344e-05	0.221826	0.736	0.607	0.439238	Ex-4	Nap1l5
919	1.69204e-14	0.219863	1	0.976	3.90454e-10	Ex-4	Ahi1
920	0.000578585	0.217616	0.409	0.314	1	Ex-4	Epha3
921	2.03689e-18	0.216789	0.398	0.173	4.70032e-14	Ex-4	Dnah7b
922	1.37787e-10	0.216782	0.488	0.305	3.17958e-06	Ex-4	Tpm1
923	3.95213e-08	0.216252	0.764	0.612	0.000911993	Ex-4	Eif2s3y
924	2.89187e-12	0.214753	0.976	0.908	6.67327e-08	Ex-4	Ctnna3
925	2.99392e-05	0.213831	0.756	0.623	0.690877	Ex-4	Ckb
926	1.04811e-14	0.211539	0.575	0.338	2.41862e-10	Ex-4	Rnf152
927	3.06212e-10	0.211417	0.756	0.577	7.06614e-06	Ex-4	9330182L06Rik
928	2.77807e-26	0.211373	0.256	0.07	6.41067e-22	Ex-4	Scube3
929	7.54432e-11	0.210621	0.811	0.625	1.74093e-06	Ex-4	Atp2c1
930	5.00894e-09	0.209801	0.48	0.315	0.000115586	Ex-4	Plekhh2
931	1.70542e-06	0.209398	0.646	0.501	0.0393542	Ex-4	Gm10684
932	2.22674e-16	0.20908	0.244	0.088	5.13842e-12	Ex-4	Gm26573
933	7.95557e-18	0.208336	0.362	0.154	1.83583e-13	Ex-4	Gbe1
934	1.24858e-09	0.208096	0.76	0.594	2.88122e-05	Ex-4	Impact
935	1.77474e-09	0.207589	0.89	0.753	4.0954e-05	Ex-4	CT025619.1
936	3.88975e-08	0.207498	0.618	0.46	0.0008976	Ex-4	Ldhb
937	0.000274995	0.206859	0.736	0.628	1	Ex-4	1700030F04Rik
938	1.08423e-09	0.20657	0.689	0.498	2.50196e-05	Ex-4	Gaa
939	1.20847e-12	0.206343	0.488	0.282	2.78867e-08	Ex-4	4921534H16Rik
940	1.07758e-13	0.204222	1	0.972	2.48662e-09	Ex-4	Nav3
941	1.13821e-11	0.203916	0.559	0.354	2.62653e-07	Ex-4	Syt13
942	9.22366e-10	0.202809	0.843	0.68	2.12845e-05	Ex-4	Epha10
943	8.21711e-12	0.202037	0.618	0.399	1.89618e-07	Ex-4	Gm12709
944	3.55785e-10	0.201687	0.992	0.943	8.2101e-06	Ex-4	AC149090.1
945	1.05511e-10	0.201524	0.602	0.389	2.43478e-06	Ex-4	Grin2d
946	2.18112e-20	0.200403	0.244	0.076	5.03316e-16	Ex-4	Palld
947	2.13561e-79	0.199986	0.161	0.008	4.92814e-75	Ex-4	Gm32122
948	6.25436e-09	0.199488	0.555	0.38	0.000144326	Ex-4	Stard9
949	8.89644e-06	0.19931	0.748	0.622	0.205294	Ex-4	Mdh1
950	3.62709e-09	0.198186	0.894	0.773	8.36986e-05	Ex-4	Adam23
951	6.49608e-233	1.24116	0.973	0.365	1.49904e-228	Ex-3	Tcf7l2
952	5.85615e-109	0.924423	0.752	0.321	1.35137e-104	Ex-3	Sphkap
953	1.83965e-116	0.912544	0.973	0.773	4.24517e-112	Ex-3	Arpp21
954	2.65798e-85	0.841227	0.946	0.8	6.13356e-81	Ex-3	Kirrel3
955	3.41563e-123	0.825988	0.994	0.611	7.88191e-119	Ex-3	Zfhx3
956	3.39382e-125	0.797868	0.917	0.45	7.83159e-121	Ex-3	Zfhx4
957	8.96637e-83	0.693249	0.731	0.341	2.06908e-78	Ex-3	Ndst3
958	9.28043e-74	0.679899	0.981	0.838	2.14155e-69	Ex-3	Cntn4
959	1.24418e-77	0.665697	0.64	0.273	2.87107e-73	Ex-3	Tfap2d
960	7.16529e-73	0.662563	0.515	0.177	1.65346e-68	Ex-3	Ndst4
961	4.41323e-64	0.659802	0.538	0.206	1.0184e-59	Ex-3	Slit3
962	2.29339e-53	0.638062	0.738	0.404	5.29222e-49	Ex-3	Meis2
963	2.63287e-48	0.567413	0.615	0.3	6.0756e-44	Ex-3	Nrgn
964	3.09586e-32	0.553874	0.862	0.677	7.144e-28	Ex-3	Hs6st3
965	3.08035e-168	0.544801	0.446	0.058	7.10821e-164	Ex-3	Sema5b
966	8.56937e-39	0.53979	0.396	0.168	1.97747e-34	Ex-3	Zbtb7c
967	8.82142e-37	0.529641	0.594	0.333	2.03563e-32	Ex-3	Cdh9
968	1.65761e-40	0.519955	0.912	0.768	3.8251e-36	Ex-3	Arl15
969	1.05635e-91	0.507519	0.54	0.158	2.43763e-87	Ex-3	2700069I18Rik
970	1.26809e-92	0.503389	0.5	0.136	2.92624e-88	Ex-3	Cbln2
971	1.85888e-57	0.482768	0.548	0.225	4.28955e-53	Ex-3	Slc4a4
972	4.64616e-62	0.475673	0.446	0.145	1.07215e-57	Ex-3	Maf
973	3.32376e-39	0.473122	0.996	0.913	7.6699e-35	Ex-3	Grik2
974	0.000118538	0.472025	0.254	0.189	1	Ex-3	Tac1
975	8.93909e-54	0.469659	0.79	0.488	2.06279e-49	Ex-3	Patj
976	4.29626e-31	0.468317	0.894	0.723	9.91404e-27	Ex-3	Pex5l
977	3.78173e-43	0.458785	0.671	0.39	8.72672e-39	Ex-3	Syt2
978	1.56516e-46	0.45827	0.612	0.308	3.61175e-42	Ex-3	Htr1f
979	1.66489e-54	0.436799	0.998	0.956	3.8419e-50	Ex-3	Celf2
980	3.23634e-41	0.432234	0.862	0.566	7.46818e-37	Ex-3	Pde7b
981	1.88763e-27	0.428073	0.877	0.726	4.35588e-23	Ex-3	Ext1
982	1.25264e-36	0.427696	0.783	0.515	2.8906e-32	Ex-3	Kcnh5
983	1.45577e-45	0.427313	0.992	0.929	3.35934e-41	Ex-3	Pcdh7
984	1.41729e-74	0.421336	0.525	0.172	3.27053e-70	Ex-3	Rnf207
985	3.55577e-46	0.410013	0.654	0.354	8.20531e-42	Ex-3	Cabp1
986	2.8233e-16	0.405028	0.51	0.326	6.51505e-12	Ex-3	Gm32647
987	3.83956e-31	0.391016	0.642	0.394	8.86017e-27	Ex-3	Bcl11a
988	1.10033e-46	0.384898	0.248	0.062	2.53912e-42	Ex-3	Sst
989	5.32963e-40	0.382828	0.875	0.635	1.22987e-35	Ex-3	Sipa1l1
990	4.69112e-62	0.382741	0.506	0.189	1.08252e-57	Ex-3	Pacsin2
991	2.18761e-153	0.379003	0.277	0.018	5.04814e-149	Ex-3	Ankrd33b
992	3.51643e-24	0.376678	0.931	0.786	8.11452e-20	Ex-3	Brinp3
993	2.50058e-12	0.375451	0.725	0.61	5.77034e-08	Ex-3	5730522E02Rik
994	8.31525e-35	0.372555	0.767	0.468	1.91883e-30	Ex-3	Kctd8
995	7.78036e-38	0.37217	0.921	0.79	1.7954e-33	Ex-3	Rasal2
996	1.29269e-26	0.367058	0.977	0.953	2.98302e-22	Ex-3	Lrrtm4
997	1.52318e-51	0.365935	0.998	0.949	3.5149e-47	Ex-3	Grm5
998	2.60514e-30	0.360822	0.921	0.698	6.01163e-26	Ex-3	Cntn6
999	5.28531e-33	0.35967	0.904	0.668	1.21964e-28	Ex-3	Nell2
1000	2.0713e-31	0.358211	0.488	0.249	4.77974e-27	Ex-3	Stac2
1001	2.17338e-47	0.355443	0.517	0.218	5.01529e-43	Ex-3	2010300C02Rik
1002	4.54297e-24	0.355288	0.923	0.829	1.04834e-19	Ex-3	Cntnap5b
1003	5.09738e-33	0.350902	0.415	0.182	1.17627e-28	Ex-3	Nwd2
1004	2.0237e-35	0.350215	1	0.943	4.6699e-31	Ex-3	Sgcz
1005	3.62919e-60	0.350132	0.458	0.153	8.37471e-56	Ex-3	Cnih3
1006	3.92147e-21	0.346356	0.883	0.722	9.04918e-17	Ex-3	Esrrg
1007	8.30799e-52	0.346306	0.494	0.189	1.91715e-47	Ex-3	Kcnip3
1008	1.43511e-37	0.343433	0.99	0.907	3.31167e-33	Ex-3	Galnt13
1009	1.35387e-24	0.337145	0.623	0.391	3.1242e-20	Ex-3	Maml3
1010	6.90777e-21	0.336651	0.285	0.129	1.59404e-16	Ex-3	Cck
1011	1.98455e-14	0.334505	0.54	0.371	4.57955e-10	Ex-3	Cdh6
1012	1.07321e-35	0.332871	0.956	0.816	2.47653e-31	Ex-3	Kcnq3
1013	1.04224e-25	0.331631	0.535	0.315	2.40508e-21	Ex-3	Nefm
1014	1.34007e-33	0.329601	0.962	0.832	3.09235e-29	Ex-3	Cacnb4
1015	9.81954e-29	0.329373	0.767	0.51	2.26596e-24	Ex-3	Srrm4
1016	1.8386e-23	0.32724	0.575	0.359	4.24275e-19	Ex-3	4930419G24Rik
1017	4.57866e-29	0.326997	0.946	0.826	1.05657e-24	Ex-3	Kctd16
1018	2.65173e-06	0.324576	0.333	0.246	0.0611913	Ex-3	Tmem132d
1019	8.95794e-45	0.322312	0.433	0.172	2.06713e-40	Ex-3	Wipf3
1020	3.89739e-27	0.321829	0.683	0.431	8.99361e-23	Ex-3	Rhbdl3
1021	5.33838e-51	0.314904	0.225	0.048	1.23188e-46	Ex-3	Iqgap2
1022	9.02836e-19	0.311667	0.633	0.423	2.08338e-14	Ex-3	Gm28905
1023	1.92139e-17	0.303993	0.548	0.354	4.43379e-13	Ex-3	L3mbtl4
1024	3.93577e-14	0.303348	0.592	0.406	9.08219e-10	Ex-3	Camk2n1
1025	6.45198e-13	0.301239	0.925	0.858	1.48886e-08	Ex-3	Dgkb
1026	1.31729e-30	0.300486	0.869	0.605	3.03979e-26	Ex-3	Zfp385b
1027	5.03651e-53	0.299377	0.435	0.152	1.16223e-48	Ex-3	Fstl1
1028	9.44857e-23	0.298925	0.719	0.506	2.18035e-18	Ex-3	Gas2
1029	4.08718e-31	0.297214	0.99	0.915	9.43158e-27	Ex-3	Kalrn
1030	1.48069e-21	0.293183	0.95	0.871	3.41683e-17	Ex-3	Pde4b
1031	2.50015e-07	0.292435	0.492	0.394	0.00576935	Ex-3	Foxp2
1032	2.13778e-24	0.290286	0.383	0.188	4.93315e-20	Ex-3	Rarb
1033	5.79149e-18	0.290254	0.79	0.605	1.33644e-13	Ex-3	Itpr1
1034	2.14702e-19	0.290054	0.66	0.476	4.95445e-15	Ex-3	Scn1b
1035	1.33332e-13	0.289829	0.231	0.118	3.07677e-09	Ex-3	Vgf
1036	1.0343e-21	0.286535	0.394	0.205	2.38675e-17	Ex-3	Lrrk2
1037	1.89453e-26	0.284469	0.494	0.267	4.37183e-22	Ex-3	Nek7
1038	4.57105e-21	0.284396	0.833	0.625	1.05482e-16	Ex-3	Adcy8
1039	1.59139e-14	0.281389	0.896	0.799	3.67229e-10	Ex-3	Brinp1
1040	1.27678e-37	0.278826	0.998	0.978	2.94631e-33	Ex-3	Gria2
1041	1.58281e-28	0.277457	0.646	0.393	3.65248e-24	Ex-3	Shc3
1042	5.27652e-25	0.276695	0.81	0.583	1.21761e-20	Ex-3	Gabra1
1043	4.17482e-112	0.27557	0.238	0.02	9.63381e-108	Ex-3	Ptk2b
1044	2.47402e-59	0.272251	0.221	0.04	5.70905e-55	Ex-3	Lmo7
1045	1.88736e-20	0.270091	0.965	0.857	4.35527e-16	Ex-3	Oxr1
1046	2.55042e-16	0.264112	0.975	0.896	5.88535e-12	Ex-3	Cntnap5a
1047	2.30903e-22	0.262872	0.602	0.388	5.32831e-18	Ex-3	Kcna1
1048	8.42149e-21	0.259761	0.719	0.507	1.94334e-16	Ex-3	Cap2
1049	2.52974e-15	0.257615	0.277	0.143	5.83763e-11	Ex-3	Rbm20
1050	1.06959e-28	0.255442	0.638	0.38	2.46819e-24	Ex-3	Coro6
1051	6.74908e-30	0.255162	0.223	0.071	1.55742e-25	Ex-3	Kcnq4
1052	2.38424e-14	0.254336	0.688	0.478	5.50188e-10	Ex-3	Plcl1
1053	1.50542e-21	0.253226	0.696	0.447	3.47392e-17	Ex-3	Cacna2d3
1054	6.00587e-87	0.252948	0.165	0.011	1.38591e-82	Ex-3	Adamtsl5
1055	7.22903e-12	0.252497	0.871	0.749	1.66817e-07	Ex-3	Sobp
1056	2.36794e-28	0.250355	0.729	0.443	5.46426e-24	Ex-3	Tmem132b
1057	9.83252e-18	0.249964	0.967	0.865	2.26895e-13	Ex-3	Pde10a
1058	3.32408e-27	0.249131	0.342	0.148	7.67065e-23	Ex-3	Sv2c
1059	1.8412e-19	0.2475	0.412	0.226	4.24876e-15	Ex-3	Mitf
1060	2.33847e-21	0.246884	0.927	0.774	5.39625e-17	Ex-3	Camk2a
1061	5.43137e-17	0.245762	0.698	0.511	1.25334e-12	Ex-3	2900055J20Rik
1062	2.54496e-18	0.242504	0.935	0.815	5.87275e-14	Ex-3	Klf12
1063	6.04948e-23	0.240781	0.606	0.375	1.39598e-18	Ex-3	Cxxc4
1064	1.07856e-07	0.240272	0.833	0.73	0.00248889	Ex-3	Etl4
1065	5.79287e-17	0.237826	0.815	0.652	1.33676e-12	Ex-3	Mir124a-1hg
1066	9.35759e-16	0.237636	0.735	0.546	2.15936e-11	Ex-3	Lin7a
1067	7.95005e-09	0.235885	0.96	0.88	0.000183455	Ex-3	Kcnh7
1068	2.19087e-13	0.235523	0.656	0.489	5.05565e-09	Ex-3	Ano6
1069	1.11078e-08	0.234494	0.91	0.833	0.000256324	Ex-3	Prkg1
1070	2.11553e-11	0.232156	0.898	0.813	4.88179e-07	Ex-3	Gria3
1071	4.77483e-06	0.231929	0.75	0.698	0.110184	Ex-3	Hs3st4
1072	7.71475e-17	0.231905	0.919	0.767	1.78026e-12	Ex-3	Kcnj3
1073	4.94001e-15	0.231812	0.871	0.679	1.13996e-10	Ex-3	Cdh10
1074	1.64378e-12	0.230571	0.912	0.844	3.79318e-08	Ex-3	Cacna1e
1075	1.39728e-10	0.22963	0.908	0.799	3.22436e-06	Ex-3	Ralgapa2
1076	1.11183e-19	0.229162	0.998	0.973	2.56566e-15	Ex-3	Cacna1a
1077	2.0358e-12	0.227904	0.562	0.387	4.69781e-08	Ex-3	Glp2r
1078	2.38843e-20	0.225365	0.896	0.727	5.51154e-16	Ex-3	Gramd1b
1079	8.48279e-16	0.224859	0.617	0.439	1.95749e-11	Ex-3	Baiap2
1080	4.60193e-18	0.224857	0.856	0.668	1.06194e-13	Ex-3	Gm40841
1081	1.36495e-18	0.223781	0.956	0.845	3.14976e-14	Ex-3	Tnr
1082	2.13298e-16	0.221753	0.962	0.868	4.92205e-12	Ex-3	Cttnbp2
1083	1.55441e-05	0.219992	0.983	0.949	0.358696	Ex-3	Nkain2
1084	1.10161e-06	0.219099	0.588	0.456	0.0254206	Ex-3	Scg2
1085	9.5807e-20	0.219075	1	1	2.21084e-15	Ex-3	Malat1
1086	1.23547e-17	0.21834	0.906	0.766	2.85097e-13	Ex-3	Adam23
1087	5.97096e-21	0.217932	0.558	0.341	1.37786e-16	Ex-3	Lhx9
1088	9.09701e-27	0.217445	0.188	0.057	2.09923e-22	Ex-3	Tll1
1089	6.52722e-69	0.216601	0.271	0.05	1.50622e-64	Ex-3	Cacng5
1090	1.72757e-16	0.215826	0.902	0.739	3.98655e-12	Ex-3	Rgs7bp
1091	2.13254e-16	0.214377	0.917	0.775	4.92105e-12	Ex-3	Tmem163
1092	2.48351e-07	0.213489	0.294	0.196	0.00573095	Ex-3	Gm2164
1093	8.28463e-18	0.212834	0.219	0.092	1.91176e-13	Ex-3	Pde11a
1094	8.60395e-14	0.212627	0.894	0.746	1.98545e-09	Ex-3	Ldb2
1095	1.50825e-34	0.212074	0.356	0.137	3.48043e-30	Ex-3	Sema3f
1096	6.52807e-14	0.210338	0.773	0.613	1.50642e-09	Ex-3	Gm48091
1097	2.51061e-18	0.20956	0.885	0.702	5.79348e-14	Ex-3	Epb41
1098	7.93547e-18	0.208878	0.631	0.418	1.83119e-13	Ex-3	Mtcl1
1099	6.43897e-13	0.208263	0.929	0.838	1.48586e-08	Ex-3	Gabrb2
1100	1.26801e-16	0.20635	0.569	0.365	2.92607e-12	Ex-3	Gm21798
1101	3.24219e-15	0.205282	0.625	0.447	7.48167e-11	Ex-3	Sparcl1
1102	2.21776e-15	0.201655	0.925	0.775	5.11771e-11	Ex-3	Aff3
1103	8.23272e-14	0.201347	0.492	0.318	1.89978e-09	Ex-3	Gm16083
1104	0.00092575	0.200284	0.642	0.563	1	Ex-3	Cntnap5c
1105	4.30633e-19	0.199696	0.362	0.191	9.93728e-15	Ex-3	Clmn
1106	1.77316e-14	0.199269	0.823	0.675	4.09174e-10	Ex-3	Ndrg4
1107	7.09858e-12	0.198805	0.81	0.662	1.63807e-07	Ex-3	Gm13629
1108	1.81847e-13	0.198264	0.773	0.621	4.19631e-09	Ex-3	Brinp2
1109	8.44727e-39	0.197225	0.233	0.063	1.94929e-34	Ex-3	Tmod1
1110	4.02482e-12	0.195809	0.685	0.523	9.28767e-08	Ex-3	Clmp
1111	3.08312e-06	0.195717	0.794	0.703	0.071146	Ex-3	Hcn1
1112	2.83108e-11	0.195705	0.55	0.379	6.53299e-07	Ex-3	Gm30382
1113	3.79411e-07	0.195673	0.883	0.766	0.00875529	Ex-3	Calm2
1114	1.24989e-15	0.195197	0.475	0.292	2.88425e-11	Ex-3	Fndc3b
1115	4.0338e-09	0.193903	0.967	0.906	9.30839e-05	Ex-3	Gm26848
1116	4.44375e-14	0.193497	0.74	0.569	1.02544e-09	Ex-3	Adgrb1
1117	1.46161e-15	0.192749	0.492	0.306	3.37281e-11	Ex-3	Phactr2
1118	7.3404e-15	0.19162	0.388	0.228	1.69387e-10	Ex-3	Ngef
1119	1.85543e-58	0.190178	0.154	0.018	4.28159e-54	Ex-3	Tpbg
1120	2.50661e-43	0.189685	0.202	0.044	5.78425e-39	Ex-3	Syndig1l
1121	7.70671e-14	0.188997	0.681	0.481	1.7784e-09	Ex-3	Thy1
1122	7.24156e-13	0.188011	0.848	0.687	1.67106e-08	Ex-3	Slc17a6
1123	1.35378e-13	0.187561	0.346	0.201	3.12399e-09	Ex-3	Ildr2
1124	2.23998e-19	0.187475	0.435	0.246	5.16898e-15	Ex-3	Lgi2
1125	1.86946e-13	0.187277	0.888	0.727	4.31397e-09	Ex-3	9530059O14Rik
1126	2.02296e-21	0.18708	0.404	0.209	4.66818e-17	Ex-3	Vstm2b
1127	2.53874e-47	0.186228	0.21	0.044	5.85841e-43	Ex-3	Nxph4
1128	4.94695e-31	0.186134	0.283	0.102	1.14156e-26	Ex-3	Irx2
1129	8.95193e-15	0.186045	0.912	0.776	2.06575e-10	Ex-3	Vti1a
1130	2.36084e-31	0.185839	0.246	0.08	5.44788e-27	Ex-3	G630016G05Rik
1131	9.45328e-20	0.18365	0.346	0.171	2.18144e-15	Ex-3	Gm12064
1132	6.20689e-11	0.183189	0.354	0.222	1.4323e-06	Ex-3	Kcnh8
1133	1.19084e-12	0.183137	0.81	0.641	2.74797e-08	Ex-3	Prkca
1134	8.15691e-16	0.182325	0.719	0.495	1.88229e-11	Ex-3	Chsy3
1135	6.00763e-20	0.18168	0.383	0.195	1.38632e-15	Ex-3	Gm37459
1136	4.03112e-10	0.181211	0.521	0.37	9.30222e-06	Ex-3	Pld5
1137	3.96632e-10	0.18066	0.931	0.863	9.15267e-06	Ex-3	Lrrtm3
1138	9.8278e-10	0.179696	0.517	0.364	2.26786e-05	Ex-3	Nefl
1139	2.4517e-09	0.179665	0.554	0.406	5.65754e-05	Ex-3	Homer1
1140	1.74831e-12	0.179459	0.673	0.499	4.03441e-08	Ex-3	Pde4a
1141	2.18697e-07	0.179392	0.958	0.886	0.00504666	Ex-3	Frmpd4
1142	2.55173e-28	0.179119	1	0.996	5.88838e-24	Ex-3	Meg3
1143	2.57071e-06	0.178976	0.406	0.296	0.0593218	Ex-3	Reln
1144	3.68006e-19	0.178225	0.444	0.242	8.49211e-15	Ex-3	Adamts3
1145	3.60657e-15	0.177923	0.369	0.201	8.32252e-11	Ex-3	Pou6f2
1146	8.34928e-11	0.177824	0.346	0.209	1.92668e-06	Ex-3	Csgalnact1
1147	2.32763e-19	0.177769	0.996	0.966	5.37125e-15	Ex-3	Myt1l
1148	4.05547e-06	0.177582	0.367	0.266	0.093584	Ex-3	Rgs20
1149	1.04275e-12	0.177176	0.608	0.438	2.40625e-08	Ex-3	Ppip5k2
1150	1.96432e-14	0.176533	0.754	0.568	4.53286e-10	Ex-3	Hjurp
1151	3.51887e-220	2.13704	1	0.143	8.12015e-216	Ex-6	Tmem132c
1152	6.46354e-94	1.93087	0.987	0.706	1.49153e-89	Ex-6	Kcnd3
1153	1.01246e-65	1.82263	0.974	0.719	2.33635e-61	Ex-6	C130073E24Rik
1154	1.28851e-63	1.78959	0.942	0.596	2.97336e-59	Ex-6	4930555F03Rik
1155	1.62389e-85	1.70734	0.987	0.703	3.74728e-81	Ex-6	Hcn1
1156	7.98979e-67	1.69599	0.884	0.457	1.84372e-62	Ex-6	Gm2516
1157	8.37623e-75	1.68415	0.923	0.416	1.9329e-70	Ex-6	Gm45321
1158	4.50426e-80	1.59267	0.994	0.732	1.0394e-75	Ex-6	Pex5l
1159	6.33679e-96	1.55175	0.89	0.242	1.46228e-91	Ex-6	Adamtsl1
1160	1.73492e-92	1.5504	0.981	0.42	4.00349e-88	Ex-6	Meis2
1161	3.2495e-77	1.52371	0.974	0.707	7.49855e-73	Ex-6	Tmem108
1162	6.21365e-69	1.49634	0.955	0.459	1.43386e-64	Ex-6	Grik1
1163	2.07864e-76	1.47812	0.923	0.411	4.79668e-72	Ex-6	Gm45323
1164	1.34947e-80	1.46085	0.994	0.948	3.11405e-76	Ex-6	Cacna1d
1165	1.47566e-100	1.44557	0.884	0.235	3.40524e-96	Ex-6	AC129186.1
1166	2.26608e-283	1.36455	0.897	0.067	5.2292e-279	Ex-6	Tmem132cos
1167	1.4298e-81	1.36382	1	0.935	3.29941e-77	Ex-6	Kcnip4
1168	2.81009e-194	1.33319	0.781	0.078	6.48457e-190	Ex-6	Gpc3
1169	1.13523e-75	1.3143	0.955	0.59	2.61965e-71	Ex-6	Dgkh
1170	6.92604e-66	1.29207	0.987	0.904	1.59825e-61	Ex-6	Cacnb2
1171	6.24947e-56	1.27151	0.845	0.393	1.44213e-51	Ex-6	Prex2
1172	1.70707e-72	1.25725	0.832	0.275	3.93924e-68	Ex-6	Gm45341
1173	4.92251e-85	1.2274	0.884	0.29	1.13592e-80	Ex-6	4933413L06Rik
1174	2.02061e-70	1.18114	0.961	0.814	4.66275e-66	Ex-6	Atrnl1
1175	3.46385e-77	1.16554	0.897	0.363	7.99318e-73	Ex-6	4930419G24Rik
1176	4.32084e-75	1.15343	0.981	0.77	9.97076e-71	Ex-6	Elmod1
1177	2.34671e-106	1.09524	0.748	0.142	5.41527e-102	Ex-6	Gda
1178	3.78717e-65	1.09047	0.948	0.671	8.73928e-61	Ex-6	Scn3a
1179	2.31343e-43	1.08949	0.645	0.214	5.33847e-39	Ex-6	Sox5
1180	4.89005e-62	1.08617	0.981	0.833	1.12843e-57	Ex-6	Kctd16
1181	2.46272e-68	1.06579	1	0.982	5.68298e-64	Ex-6	Dpp6
1182	2.53218e-105	1.05397	0.806	0.173	5.84325e-101	Ex-6	Npnt
1183	5.98641e-52	1.02695	0.961	0.686	1.38142e-47	Ex-6	Fgf13
1184	4.22929e-41	1.02591	0.981	0.836	9.7595e-37	Ex-6	Prkg1
1185	1.06436e-50	1.00078	0.987	0.81	2.45611e-46	Ex-6	Fam19a1
1186	8.78139e-76	0.992983	0.852	0.289	2.02639e-71	Ex-6	Tpd52l1
1187	8.1656e-50	0.985769	0.981	0.809	1.88429e-45	Ex-6	Kirrel3
1188	1.12427e-54	0.972718	0.974	0.482	2.59437e-50	Ex-6	Kctd8
1189	8.20895e-52	0.971673	1	0.703	1.8943e-47	Ex-6	Grm8
1190	3.62938e-48	0.966427	0.974	0.804	8.37516e-44	Ex-6	Cdh13
1191	2.93974e-44	0.958946	0.89	0.505	6.78375e-40	Ex-6	Chsy3
1192	1.74451e-65	0.946863	0.948	0.494	4.02564e-61	Ex-6	Ripor2
1193	3.47833e-41	0.944528	1	0.91	8.02658e-37	Ex-6	Galntl6
1194	2.95869e-61	0.93998	0.903	0.431	6.82747e-57	Ex-6	Slc1a1
1195	7.65e-57	0.938222	0.981	0.893	1.76532e-52	Ex-6	Kcnc2
1196	6.60031e-201	0.936894	0.613	0.04	1.52309e-196	Ex-6	A630012P03Rik
1197	6.76147e-40	0.928156	0.974	0.642	1.56028e-35	Ex-6	Egfem1
1198	3.53867e-58	0.924709	0.961	0.789	8.16584e-54	Ex-6	Ttc28
1199	3.258e-61	0.922609	0.942	0.456	7.51816e-57	Ex-6	Tmem132b
1200	1.36218e-59	0.902172	0.91	0.385	3.14336e-55	Ex-6	Trhde
1201	7.72845e-64	0.887991	0.839	0.275	1.78342e-59	Ex-6	Maml2
1202	9.66447e-79	0.887033	0.755	0.181	2.23017e-74	Ex-6	Wls
1203	3.42427e-171	0.884383	0.677	0.064	7.90185e-167	Ex-6	Egflam
1204	6.38989e-45	0.880968	0.826	0.447	1.47453e-40	Ex-6	4430402I18Rik
1205	1.95343e-37	0.866767	0.961	0.91	4.50774e-33	Ex-6	Kcnb2
1206	1.25649e-66	0.86564	0.987	0.95	2.89947e-62	Ex-6	Nav2
1207	1.07977e-40	0.861898	0.955	0.787	2.49167e-36	Ex-6	Nell1
1208	1.44735e-24	0.852653	1	0.994	3.33991e-20	Ex-6	Cntnap2
1209	7.61565e-56	0.850998	0.903	0.362	1.75739e-51	Ex-6	Necab1
1210	9.74581e-69	0.848514	0.987	0.982	2.24894e-64	Ex-6	Rora
1211	7.60902e-53	0.84358	0.768	0.241	1.75586e-48	Ex-6	D130079A08Rik
1212	7.97404e-231	0.838757	0.677	0.042	1.84009e-226	Ex-6	Scml2
1213	2.22214e-49	0.838623	0.794	0.309	5.1278e-45	Ex-6	Gm13269
1214	1.78628e-42	0.834583	0.903	0.457	4.12202e-38	Ex-6	Cacna2d3
1215	1.763e-45	0.830379	0.968	0.711	4.0683e-41	Ex-6	Pid1
1216	1.327e-33	0.829719	0.942	0.687	3.06219e-29	Ex-6	Gm26905
1217	8.63458e-59	0.829365	0.735	0.217	1.99252e-54	Ex-6	Gm48094
1218	4.1484e-49	0.825815	0.961	0.742	9.57284e-45	Ex-6	Zfp462
1219	1.52296e-109	0.815904	0.658	0.099	3.51437e-105	Ex-6	Gm10848
1220	4.17629e-40	0.800499	0.942	0.562	9.63721e-36	Ex-6	Pbx3
1221	2.59359e-49	0.800057	1	0.988	5.98497e-45	Ex-6	Ptprd
1222	3.58947e-44	0.785082	0.987	0.884	8.28306e-40	Ex-6	Ccdc85a
1223	4.77248e-78	0.778863	0.768	0.195	1.1013e-73	Ex-6	Gm37459
1224	1.44874e-54	0.772436	0.974	0.662	3.3431e-50	Ex-6	Tmtc1
1225	6.52459e-45	0.765735	0.968	0.741	1.50561e-40	Ex-6	Nyap2
1226	1.50474e-20	0.755331	0.845	0.602	3.47234e-16	Ex-6	Gm28928
1227	2.36712e-38	0.750269	0.935	0.604	5.46238e-34	Ex-6	Trpc5
1228	4.54631e-40	0.743696	0.942	0.727	1.04911e-35	Ex-6	Atp2b1
1229	2.02885e-40	0.741182	0.994	0.863	4.68177e-36	Ex-6	Robo2
1230	9.7486e-47	0.741002	0.923	0.628	2.24959e-42	Ex-6	Cers6
1231	7.74436e-45	0.739539	0.916	0.447	1.78709e-40	Ex-6	Bcl11b
1232	5.05265e-53	0.726605	0.923	0.351	1.16595e-48	Ex-6	Lhfp
1233	5.70665e-41	0.723244	0.968	0.87	1.31687e-36	Ex-6	Zeb1
1234	9.90588e-41	0.722835	0.968	0.689	2.28588e-36	Ex-6	Adcy2
1235	1.62773e-32	0.710228	0.961	0.795	3.75616e-28	Ex-6	Grm1
1236	1.70756e-37	0.709329	0.768	0.307	3.94037e-33	Ex-6	Pde3a
1237	1.29785e-29	0.707213	0.974	0.847	2.99491e-25	Ex-6	Plcb1
1238	6.68065e-38	0.700875	0.968	0.853	1.54163e-33	Ex-6	Tnr
1239	9.47857e-38	0.694138	0.91	0.708	2.18727e-33	Ex-6	Tspoap1
1240	2.50761e-37	0.681522	0.942	0.737	5.78657e-33	Ex-6	9530059O14Rik
1241	1.1612e-36	0.67189	0.955	0.854	2.67959e-32	Ex-6	Camk2d
1242	1.51442e-62	0.649863	0.69	0.175	3.49468e-58	Ex-6	Sgk3
1243	8.05625e-41	0.641761	0.981	0.944	1.85906e-36	Ex-6	Syne1
1244	3.05055e-38	0.640614	0.974	0.881	7.03945e-34	Ex-6	Fry
1245	2.22781e-29	0.63506	0.871	0.511	5.1409e-25	Ex-6	Ptprz1
1246	5.10823e-33	0.62968	0.903	0.573	1.17878e-28	Ex-6	Cdk17
1247	3.48274e-34	0.624461	0.839	0.421	8.03678e-30	Ex-6	Cplx2
1248	1.80231e-34	0.623143	0.961	0.891	4.159e-30	Ex-6	Frmpd4
1249	4.24774e-28	0.61414	0.903	0.694	9.8021e-24	Ex-6	1700025G04Rik
1250	2.94851e-33	0.613157	0.91	0.591	6.80397e-29	Ex-6	Epha4
1251	8.4733e-21	0.612851	0.71	0.395	1.9553e-16	Ex-6	Glp2r
1252	1.29746e-84	0.610094	0.465	0.058	2.99401e-80	Ex-6	Sox5os4
1253	4.5606e-25	0.606223	0.948	0.783	1.05241e-20	Ex-6	Dock4
1254	3.66178e-16	0.605566	0.91	0.789	8.44993e-12	Ex-6	Shisa9
1255	4.61465e-22	0.602602	0.981	0.919	1.06488e-17	Ex-6	Tenm3
1256	1.21636e-24	0.590922	0.652	0.295	2.80686e-20	Ex-6	Gulp1
1257	6.99917e-15	0.587286	0.994	0.973	1.61513e-10	Ex-6	Lrp1b
1258	8.31049e-19	0.58173	0.626	0.318	1.91773e-14	Ex-6	Zfp536
1259	2.25493e-17	0.581207	0.748	0.5	5.20348e-13	Ex-6	Zmat4
1260	4.96063e-45	0.567864	0.994	0.98	1.14471e-40	Ex-6	Gria2
1261	9.36602e-30	0.566573	0.871	0.518	2.1613e-25	Ex-6	2900055J20Rik
1262	7.96554e-22	0.563751	0.929	0.757	1.83813e-17	Ex-6	Thsd7a
1263	3.8095e-27	0.56049	0.923	0.622	8.79081e-23	Ex-6	Zfp385b
1264	2.69167e-22	0.551143	0.981	0.92	6.21129e-18	Ex-6	Rgs7
1265	9.83648e-29	0.550579	1	0.98	2.26987e-24	Ex-6	Lrrc4c
1266	6.70622e-27	0.547837	0.748	0.349	1.54753e-22	Ex-6	Sntg2
1267	4.06869e-68	0.546778	0.632	0.135	9.38891e-64	Ex-6	Strip2
1268	9.07455e-34	0.545187	0.839	0.425	2.09404e-29	Ex-6	Sorl1
1269	9.26716e-40	0.542881	0.613	0.182	2.13849e-35	Ex-6	Sema3e
1270	1.88859e-27	0.542639	0.406	0.117	4.35812e-23	Ex-6	Chst9
1271	2.40761e-23	0.539581	0.948	0.812	5.5558e-19	Ex-6	Fmnl2
1272	3.20963e-08	0.538065	0.819	0.688	0.000740655	Ex-6	Calm1
1273	1.75174e-38	0.537943	0.542	0.161	4.04231e-34	Ex-6	Cbln2
1274	6.99934e-34	0.534048	0.987	0.966	1.61517e-29	Ex-6	Pde4d
1275	2.0743e-23	0.533153	0.929	0.681	4.78666e-19	Ex-6	Ncald
1276	1.66591e-134	0.531477	0.374	0.021	3.84425e-130	Ex-6	Gm14582
1277	4.63034e-21	0.528797	0.942	0.807	1.0685e-16	Ex-6	Cdh2
1278	1.42519e-33	0.519359	0.671	0.252	3.28878e-29	Ex-6	Gabra4
1279	2.96296e-35	0.519315	0.677	0.249	6.83733e-31	Ex-6	Adamts3
1280	9.48547e-31	0.515713	0.955	0.837	2.18887e-26	Ex-6	Nrcam
1281	1.83669e-44	0.50896	0.755	0.252	4.23835e-40	Ex-6	B3glct
1282	5.14411e-65	0.503093	0.381	0.051	1.18705e-60	Ex-6	Hpgd
1283	2.40055e-45	0.501012	0.2	0.02	5.53951e-41	Ex-6	Rasef
1284	3.52785e-25	0.499312	0.916	0.704	8.14087e-21	Ex-6	Luzp1
1285	1.13212e-35	0.497233	0.735	0.274	2.61248e-31	Ex-6	Osbpl3
1286	1.07306e-65	0.496422	0.574	0.113	2.4762e-61	Ex-6	Tnfrsf19
1287	1.71598e-26	0.495086	1	0.954	3.9598e-22	Ex-6	Lrrtm4
1288	5.02308e-19	0.483588	0.955	0.839	1.15913e-14	Ex-6	Arid1b
1289	7.86524e-19	0.481148	0.742	0.386	1.81498e-14	Ex-6	Prkd1
1290	4.10146e-14	0.478398	0.91	0.721	9.46452e-10	Ex-6	Cdh8
1291	2.29352e-23	0.478226	0.884	0.58	5.29252e-19	Ex-6	Cnksr2
1292	2.36367e-20	0.477782	0.974	0.948	5.45441e-16	Ex-6	Sgcz
1293	8.96262e-31	0.476904	0.639	0.236	2.06821e-26	Ex-6	Tacr1
1294	1.38722e-08	0.476547	0.806	0.628	0.000320115	Ex-6	1700030F04Rik
1295	1.06719e-24	0.475056	0.974	0.951	2.46266e-20	Ex-6	Dlgap1
1296	2.66485e-13	0.470019	0.961	0.834	6.14941e-09	Ex-6	Cntnap5b
1297	3.12766e-22	0.467165	0.845	0.536	7.2174e-18	Ex-6	Syt14
1298	9.36164e-21	0.466837	0.774	0.419	2.16029e-16	Ex-6	D030068K23Rik
1299	4.13723e-16	0.463448	0.729	0.388	9.54706e-12	Ex-6	Dach1
1300	2.40623e-34	0.456524	0.555	0.174	5.5526e-30	Ex-6	Lgr5
1301	3.17456e-25	0.456008	0.787	0.428	7.32561e-21	Ex-6	Qk
1302	1.34204e-59	0.451933	0.535	0.104	3.09689e-55	Ex-6	Ppfibp1
1303	2.56803e-20	0.450617	0.884	0.629	5.92599e-16	Ex-6	Kcnj6
1304	4.28045e-23	0.448852	0.787	0.392	9.87756e-19	Ex-6	Nxph1
1305	5.41195e-19	0.448491	0.729	0.395	1.24886e-14	Ex-6	Pacrg
1306	1.15998e-22	0.446112	0.6	0.243	2.67677e-18	Ex-6	Tmem132d
1307	1.13656e-32	0.440106	0.6	0.203	2.62272e-28	Ex-6	Npas2
1308	1.00139e-24	0.43791	0.994	0.927	2.3108e-20	Ex-6	Park2
1309	4.26153e-26	0.435074	0.974	0.968	9.8339e-22	Ex-6	Syt1
1310	4.90817e-23	0.432691	0.935	0.808	1.13261e-18	Ex-6	Setbp1
1311	7.61273e-06	0.432673	0.723	0.576	0.175671	Ex-6	Pcdh11x
1312	4.09244e-20	0.430562	0.923	0.653	9.4437e-16	Ex-6	Hs6st2
1313	4.05869e-16	0.429968	0.555	0.272	9.36583e-12	Ex-6	4930567K20Rik
1314	1.02227e-17	0.426707	0.955	0.874	2.35898e-13	Ex-6	Cdc42bpa
1315	1.41439e-54	0.426426	0.387	0.059	3.26384e-50	Ex-6	Tll1
1316	1.04849e-31	0.424918	0.884	0.409	2.41949e-27	Ex-6	Mgll
1317	2.01938e-18	0.423693	0.987	0.887	4.65993e-14	Ex-6	Mgat4c
1318	1.25633e-18	0.417914	0.981	0.942	2.8991e-14	Ex-6	Pbx1
1319	7.95997e-26	0.417202	0.555	0.204	1.83684e-21	Ex-6	Satb1
1320	7.07233e-21	0.414813	0.923	0.754	1.63201e-16	Ex-6	Dner
1321	8.7684e-18	0.414704	0.755	0.453	2.0234e-13	Ex-6	Hace1
1322	1.23726e-68	0.412946	0.465	0.071	2.85511e-64	Ex-6	Gm16267
1323	1.94461e-54	0.407939	0.2	0.016	4.48737e-50	Ex-6	AI481877
1324	1.88245e-26	0.407737	0.574	0.198	4.34395e-22	Ex-6	Gpr149
1325	5.07687e-13	0.402368	0.877	0.688	1.17154e-08	Ex-6	Rtl4
1326	1.00584e-29	0.402058	0.587	0.207	2.32107e-25	Ex-6	C79798
1327	7.71999e-19	0.401712	0.658	0.329	1.78147e-14	Ex-6	Nell1os
1328	5.64228e-15	0.399239	0.871	0.69	1.30201e-10	Ex-6	Ldlrad4
1329	2.1275e-15	0.397854	0.955	0.743	4.90942e-11	Ex-6	Caln1
1330	1.72409e-14	0.393289	0.742	0.48	3.97851e-10	Ex-6	Osbpl10
1331	6.77136e-17	0.392816	0.677	0.358	1.56256e-12	Ex-6	9630028H03Rik
1332	3.33331e-16	0.39216	0.865	0.619	7.69196e-12	Ex-6	Sh3kbp1
1333	3.37754e-15	0.39114	0.684	0.378	7.79401e-11	Ex-6	Phka2
1334	6.16766e-58	0.389351	0.374	0.053	1.42325e-53	Ex-6	Igsf11
1335	1.24604e-17	0.3885	0.516	0.236	2.87537e-13	Ex-6	Nudt4
1336	5.02004e-12	0.386323	0.832	0.624	1.15843e-07	Ex-6	Rnf150
1337	5.18856e-11	0.385614	0.69	0.438	1.19731e-06	Ex-6	A330008L17Rik
1338	1.55219e-08	0.377293	0.994	0.914	0.000358184	Ex-6	Ptprg
1339	1.56651e-26	0.376634	0.665	0.27	3.61487e-22	Ex-6	Trpc3
1340	6.37022e-20	0.373521	0.748	0.389	1.46999e-15	Ex-6	Il1rap
1341	2.21281e-15	0.372982	0.955	0.784	5.10628e-11	Ex-6	Tmem163
1342	2.04988e-14	0.371554	0.826	0.591	4.73031e-10	Ex-6	Unc13b
1343	2.38612e-25	0.369721	0.497	0.169	5.50622e-21	Ex-6	St8sia6
1344	2.24391e-15	0.369673	0.206	0.055	5.17805e-11	Ex-6	3300002A11Rik
1345	1.98445e-16	0.369466	0.665	0.341	4.57931e-12	Ex-6	Serpine2
1346	2.69698e-15	0.368099	0.968	0.905	6.22355e-11	Ex-6	Dgki
1347	5.58775e-13	0.367603	0.8	0.558	1.28943e-08	Ex-6	Rps6ka3
1348	4.81932e-15	0.365637	0.987	0.934	1.11211e-10	Ex-6	Gabrb1
1349	1.0121e-17	0.364964	0.684	0.349	2.33553e-13	Ex-6	Klhl5
1350	8.88981e-12	0.363962	0.955	0.752	2.05141e-07	Ex-6	A830018L16Rik
1351	3.82439e-106	1.73313	1	0.718	8.82516e-102	Ex-9	Hdac9
1352	2.68942e-116	1.66604	0.985	0.404	6.20611e-112	Ex-9	Rorb
1353	1.10513e-116	1.60871	0.918	0.337	2.55019e-112	Ex-9	Gm44593
1354	1.7944e-119	1.52665	0.959	0.393	4.14077e-115	Ex-9	Pdzd2
1355	2.36275e-102	1.49067	0.995	0.484	5.45227e-98	Ex-9	Col25a1
1356	1.27404e-114	1.47348	0.959	0.401	2.93999e-110	Ex-9	Mgll
1357	5.62694e-107	1.44297	0.964	0.548	1.29847e-102	Ex-9	Cux2
1358	8.70962e-90	1.37998	0.938	0.529	2.00983e-85	Ex-9	Cdh7
1359	6.19906e-256	1.35428	0.768	0.067	1.43049e-251	Ex-9	Col18a1
1360	1.07137e-111	1.31676	0.979	0.325	2.47228e-107	Ex-9	Bnc2
1361	2.40306e-99	1.30558	0.99	0.611	5.54531e-95	Ex-9	Sema6a
1362	1.06397e-86	1.28892	0.99	0.689	2.45522e-82	Ex-9	Zfp804b
1363	1.4313e-136	1.28331	0.825	0.189	3.30288e-132	Ex-9	Gabrg1
1364	1.58323e-87	1.26025	0.99	0.639	3.65346e-83	Ex-9	Egfem1
1365	3.39592e-81	1.21938	0.959	0.657	7.83642e-77	Ex-9	Gabra2
1366	6.44727e-80	1.17416	0.887	0.351	1.48777e-75	Ex-9	Ebf2
1367	2.14851e-80	1.17192	0.985	0.753	4.95791e-76	Ex-9	Thsd7a
1368	7.97698e-86	1.13183	1	0.89	1.84077e-81	Ex-9	Cntn5
1369	3.20457e-82	1.13087	0.892	0.413	7.39486e-78	Ex-9	Nrp2
1370	2.25147e-142	1.11039	0.686	0.102	5.19548e-138	Ex-9	Pde5a
1371	1.71855e-141	1.08887	0.686	0.106	3.96573e-137	Ex-9	Npl
1372	1.24816e-74	1.0876	1	0.911	2.88026e-70	Ex-9	Dcc
1373	6.50767e-81	1.08594	0.918	0.376	1.50171e-76	Ex-9	Prkd1
1374	2.98537e-77	1.07243	0.928	0.412	6.88905e-73	Ex-9	Gfra1
1375	2.02986e-73	1.05105	0.974	0.722	4.68411e-69	Ex-9	Cntn3
1376	6.47565e-64	1.04919	0.938	0.619	1.49432e-59	Ex-9	Zfp385b
1377	2.65775e-74	1.04785	0.928	0.548	6.13303e-70	Ex-9	Sorcs2
1378	6.40682e-88	1.04396	0.99	0.95	1.47844e-83	Ex-9	Cacna2d1
1379	6.95972e-67	1.04258	1	0.971	1.60602e-62	Ex-9	Pcdh9
1380	1.20047e-84	1.03564	0.995	0.973	2.7702e-80	Ex-9	Lrfn5
1381	3.65698e-87	1.02823	0.794	0.246	8.43884e-83	Ex-9	Prmt8
1382	1.79012e-70	1.02729	0.871	0.418	4.13089e-66	Ex-9	Galnt18
1383	4.02403e-77	1.00843	1	0.9	9.28586e-73	Ex-9	Cntnap5a
1384	1.23037e-81	0.955949	0.701	0.198	2.8392e-77	Ex-9	Arap2
1385	8.95332e-59	0.943242	0.933	0.736	2.06607e-54	Ex-9	Mctp1
1386	1.48956e-67	0.940745	0.943	0.603	3.4373e-63	Ex-9	Rbms1
1387	3.92229e-59	0.935117	0.969	0.542	9.05108e-55	Ex-9	Ptprm
1388	1.10671e-54	0.935101	0.928	0.714	2.55385e-50	Ex-9	Khdrbs3
1389	2.37415e-70	0.914895	0.747	0.256	5.4786e-66	Ex-9	Pard3b
1390	9.2659e-64	0.914894	0.866	0.348	2.1382e-59	Ex-9	Lhfp
1391	9.62129e-100	0.906031	0.639	0.131	2.22021e-95	Ex-9	Tspan18
1392	2.8156e-91	0.902212	1	0.968	6.49729e-87	Ex-9	Dab1
1393	8.86026e-59	0.899586	0.979	0.747	2.04459e-54	Ex-9	Dscaml1
1394	2.31969e-58	0.896567	0.943	0.524	5.35291e-54	Ex-9	Ebf3
1395	3.3651e-68	0.89449	0.99	0.862	7.7653e-64	Ex-9	Robo2
1396	3.97633e-34	0.893966	0.732	0.391	9.17577e-30	Ex-9	Nxph1
1397	1.10503e-55	0.870737	0.918	0.58	2.54996e-51	Ex-9	Camk4
1398	3.20079e-54	0.867324	0.861	0.455	7.38613e-50	Ex-9	Lmo3
1399	1.76004e-50	0.865815	0.969	0.751	4.06147e-46	Ex-9	Nkain3
1400	1.45528e-53	0.84853	0.835	0.397	3.35819e-49	Ex-9	Maml3
1401	6.53831e-61	0.833315	0.99	0.8	1.50878e-56	Ex-9	2021-03-01
1402	5.05589e-64	0.821952	0.691	0.228	1.1667e-59	Ex-9	Rftn1
1403	5.5481e-43	0.8213	0.876	0.744	1.28028e-38	Ex-9	Apba2
1404	3.9349e-66	0.805056	1	0.973	9.08018e-62	Ex-9	Lrp1b
1405	3.81242e-40	0.770326	0.814	0.573	8.79754e-36	Ex-9	Wscd2
1406	1.51712e-69	0.769774	0.99	0.968	3.50091e-65	Ex-9	Syt1
1407	1.6781e-37	0.761164	0.814	0.47	3.87237e-33	Ex-9	Stxbp6
1408	1.27413e-53	0.758324	0.773	0.303	2.94018e-49	Ex-9	Pde3a
1409	5.3721e-48	0.755159	0.938	0.592	1.23967e-43	Ex-9	Lef1
1410	2.10575e-42	0.748204	0.871	0.521	4.85923e-38	Ex-9	Ankfn1
1411	2.04737e-41	0.738527	0.613	0.254	4.72451e-37	Ex-9	B3glct
1412	4.04309e-44	0.729574	0.773	0.372	9.32983e-40	Ex-9	Cdh6
1413	1.10115e-54	0.720635	1	0.933	2.541e-50	Ex-9	Gabrb1
1414	1.17404e-153	0.711158	0.371	0.021	2.7092e-149	Ex-9	Slc1a3
1415	1.98928e-36	0.706334	0.629	0.29	4.59047e-32	Ex-9	4930587E11Rik
1416	7.28968e-33	0.698799	0.866	0.559	1.68217e-28	Ex-9	Cntnap5c
1417	7.53029e-41	0.698005	0.67	0.325	1.73769e-36	Ex-9	Syt9
1418	2.25638e-48	0.692331	0.634	0.248	5.20683e-44	Ex-9	Slc7a8
1419	4.18168e-45	0.691875	0.979	0.861	9.64964e-41	Ex-9	Grin2a
1420	3.13495e-53	0.682664	0.985	0.887	7.23421e-49	Ex-9	Plcb4
1421	5.31153e-54	0.680921	0.397	0.084	1.22569e-49	Ex-9	Gm20063
1422	8.97444e-35	0.680043	0.392	0.115	2.07094e-30	Ex-9	Chst9
1423	9.96181e-42	0.670248	0.99	0.865	2.29879e-37	Ex-9	Fam19a2
1424	1.18282e-75	0.667939	0.459	0.08	2.72948e-71	Ex-9	Nek11
1425	2.46541e-45	0.666214	0.974	0.874	5.68918e-41	Ex-9	Cttnbp2
1426	9.48746e-38	0.663988	0.701	0.312	2.18933e-33	Ex-9	Zfp536
1427	1.76928e-25	0.657972	0.722	0.508	4.08278e-21	Ex-9	Kctd1
1428	6.71356e-39	0.653228	0.969	0.888	1.54922e-34	Ex-9	Hecw2
1429	9.53765e-34	0.646385	0.912	0.753	2.20091e-29	Ex-9	Dner
1430	1.68959e-31	0.642332	0.639	0.29	3.8989e-27	Ex-9	Pde1a
1431	1.93922e-28	0.637247	0.51	0.224	4.47493e-24	Ex-9	Kcnh8
1432	4.50843e-38	0.63677	0.871	0.59	1.04036e-33	Ex-9	Epha4
1433	2.20931e-27	0.636213	0.557	0.257	5.09821e-23	Ex-9	Mei4
1434	8.05466e-36	0.635223	0.881	0.588	1.85869e-31	Ex-9	Galnt14
1435	3.03724e-45	0.632661	0.562	0.184	7.00874e-41	Ex-9	4930438E09Rik
1436	8.14109e-36	0.632397	0.897	0.636	1.87864e-31	Ex-9	Gm45881
1437	3.2189e-37	0.625355	0.454	0.143	7.42793e-33	Ex-9	Atp10a
1438	1.82249e-40	0.621474	1	0.951	4.20558e-36	Ex-9	Ncam2
1439	6.36507e-32	0.618355	0.696	0.392	1.4688e-27	Ex-9	Znrf3
1440	3.25912e-31	0.615878	0.593	0.295	7.52075e-27	Ex-9	Tmem65
1441	3.16346e-35	0.612884	0.536	0.195	7.29999e-31	Ex-9	Kitl
1442	4.24394e-18	0.608566	0.871	0.706	9.79331e-14	Ex-9	Efna5
1443	1.53402e-33	0.608379	0.531	0.222	3.5399e-29	Ex-9	Crhr1
1444	1.47828e-26	0.605616	0.789	0.674	3.41128e-22	Ex-9	Adarb1
1445	2.07642e-45	0.601822	0.995	0.977	4.79156e-41	Ex-9	Il1rapl1
1446	2.01767e-24	0.596021	0.531	0.281	4.65597e-20	Ex-9	Rgs8
1447	1.27927e-71	0.58895	0.448	0.077	2.95204e-67	Ex-9	Robo3
1448	2.64019e-26	0.584899	0.804	0.548	6.0925e-22	Ex-9	Kcnab1
1449	4.98771e-35	0.584319	0.608	0.274	1.15096e-30	Ex-9	Gm3764
1450	1.41053e-24	0.579428	0.82	0.7	3.25494e-20	Ex-9	Gabbr1
1451	4.47322e-59	0.57731	0.222	0.022	1.03224e-54	Ex-9	C1ql1
1452	6.36777e-30	0.573962	0.778	0.506	1.46943e-25	Ex-9	Rph3a
1453	3.31669e-57	0.573621	0.335	0.056	7.65359e-53	Ex-9	Tgfb2
1454	8.34262e-30	0.566414	0.531	0.235	1.92514e-25	Ex-9	Gm13944
1455	3.01824e-30	0.563171	0.747	0.405	6.96489e-26	Ex-9	Bcl11a
1456	2.85512e-31	0.561011	0.696	0.345	6.58849e-27	Ex-9	Cdh9
1457	7.08779e-40	0.557851	0.371	0.093	1.63558e-35	Ex-9	Itga7
1458	5.40505e-36	0.556046	0.974	0.859	1.24727e-31	Ex-9	Runx1t1
1459	1.53862e-35	0.553503	0.995	0.886	3.55052e-31	Ex-9	Mgat4c
1460	1.7036e-34	0.548518	0.448	0.153	3.93123e-30	Ex-9	Ldlrad3
1461	7.38595e-23	0.546921	0.732	0.501	1.70438e-18	Ex-9	Kcnk2
1462	3.13986e-23	0.545394	0.768	0.512	7.24554e-19	Ex-9	Ptprz1
1463	4.62956e-27	0.543306	0.83	0.642	1.06832e-22	Ex-9	Fam135b
1464	8.07417e-22	0.53975	0.881	0.599	1.8632e-17	Ex-9	Gm28928
1465	3.65125e-20	0.531733	0.582	0.349	8.42562e-16	Ex-9	Msra
1466	1.4749e-37	0.53069	0.995	0.894	3.40347e-33	Ex-9	Trpm3
1467	6.77696e-21	0.530453	0.644	0.447	1.56385e-16	Ex-9	B3gat1
1468	7.72331e-26	0.528738	0.897	0.687	1.78223e-21	Ex-9	Fgf13
1469	2.30981e-27	0.528102	1	0.897	5.33011e-23	Ex-9	Unc5d
1470	5.73812e-84	0.525186	0.345	0.039	1.32413e-79	Ex-9	Car8
1471	6.71419e-17	0.522864	0.66	0.516	1.54937e-12	Ex-9	Cntln
1472	5.27559e-25	0.515213	0.964	0.839	1.21739e-20	Ex-9	Pdzrn4
1473	2.5947e-84	0.512444	0.294	0.027	5.98752e-80	Ex-9	Col5a1
1474	5.7952e-32	0.511228	0.995	0.951	1.3373e-27	Ex-9	Tenm4
1475	9.884e-23	0.509429	0.804	0.59	2.28083e-18	Ex-9	Unc13b
1476	1.72729e-16	0.506067	0.433	0.221	3.9859e-12	Ex-9	Otof
1477	1.59207e-20	0.50367	0.598	0.355	3.67386e-16	Ex-9	Ankrd6
1478	6.69401e-30	0.50352	0.387	0.128	1.54471e-25	Ex-9	Ahr
1479	2.19452e-24	0.501565	0.82	0.615	5.06407e-20	Ex-9	Sez6l
1480	7.87258e-45	0.501424	0.995	0.987	1.81668e-40	Ex-9	Nlgn1
1481	1.18755e-13	0.501304	0.562	0.358	2.7404e-09	Ex-9	Ntng2
1482	2.09344e-36	0.499424	0.985	0.942	4.83081e-32	Ex-9	Pbx1
1483	1.29954e-13	0.492893	0.722	0.589	2.99882e-09	Ex-9	Gab2
1484	1.78004e-23	0.490677	0.959	0.853	4.10761e-19	Ex-9	Spock3
1485	3.88955e-20	0.485831	0.505	0.267	8.97552e-16	Ex-9	Ptk7
1486	3.18998e-18	0.48364	0.521	0.311	7.36119e-14	Ex-9	Adcy1
1487	2.46722e-30	0.483448	0.985	0.757	5.69336e-26	Ex-9	Rbms3
1488	1.8644e-15	0.482538	0.686	0.535	4.30229e-11	Ex-9	Macrod1
1489	1.06421e-18	0.482037	0.531	0.322	2.45578e-14	Ex-9	Grm4
1490	9.8737e-27	0.480438	0.423	0.152	2.27846e-22	Ex-9	Calb1
1491	1.38537e-23	0.479464	0.892	0.767	3.19687e-19	Ex-9	Rab3c
1492	8.56975e-21	0.477666	0.34	0.129	1.97755e-16	Ex-9	Gm46102
1493	4.60898e-19	0.476507	0.773	0.619	1.06357e-14	Ex-9	Sgk1
1494	9.68363e-15	0.474368	0.938	0.849	2.23459e-10	Ex-9	Cntn4
1495	8.9895e-17	0.466581	0.634	0.446	2.07442e-12	Ex-9	Gprin3
1496	2.15838e-28	0.466242	0.376	0.123	4.98067e-24	Ex-9	Colgalt2
1497	1.25636e-23	0.453265	0.969	0.867	2.89917e-19	Ex-9	Epha6
1498	2.02695e-18	0.451924	0.361	0.154	4.6774e-14	Ex-9	Golim4
1499	2.57197e-21	0.449085	0.464	0.209	5.93508e-17	Ex-9	Stac
1500	3.05101e-12	0.447226	0.485	0.291	7.04051e-08	Ex-9	Hs3st2
1501	2.4422e-18	0.446408	0.686	0.409	5.63562e-14	Ex-9	Gm20754
1502	3.60404e-22	0.446202	0.546	0.288	8.31668e-18	Ex-9	Crtac1
1503	9.19605e-16	0.445922	0.649	0.446	2.12208e-11	Ex-9	Samd5
1504	3.29726e-15	0.445133	0.552	0.354	7.60876e-11	Ex-9	Sdk2
1505	3.1682e-18	0.444408	0.964	0.934	7.31094e-14	Ex-9	Pcdh7
1506	7.08701e-14	0.444126	0.454	0.266	1.6354e-09	Ex-9	Klhl13
1507	7.52125e-25	0.440387	0.376	0.138	1.7356e-20	Ex-9	Gm3510
1508	3.15818e-13	0.434278	0.5	0.304	7.28783e-09	Ex-9	A330015K06Rik
1509	3.9782e-16	0.432438	0.531	0.33	9.1801e-12	Ex-9	Etv6
1510	4.88859e-14	0.43241	0.613	0.443	1.12809e-09	Ex-9	Eps15
1511	1.08795e-16	0.431022	0.799	0.703	2.51055e-12	Ex-9	Mtss1
1512	5.16527e-26	0.425972	0.948	0.833	1.19194e-21	Ex-9	Msi2
1513	3.30064e-24	0.42467	0.943	0.905	7.61656e-20	Ex-9	Cit
1514	1.63862e-40	0.423738	0.314	0.067	3.78128e-36	Ex-9	Barhl1
1515	2.96217e-28	0.421283	0.995	0.978	6.8355e-24	Ex-9	Ccser1
1516	5.66393e-14	0.421221	0.546	0.37	1.30701e-09	Ex-9	Nf2
1517	9.03011e-23	0.419731	0.995	0.923	2.08379e-18	Ex-9	Dpp10
1518	1.84453e-14	0.417347	0.686	0.547	4.25644e-10	Ex-9	Tnrc18
1519	6.13342e-19	0.416127	0.825	0.731	1.41535e-14	Ex-9	Mgat5
1520	3.30367e-14	0.414542	0.474	0.285	7.62355e-10	Ex-9	Sec14l1
1521	5.06669e-15	0.413886	0.397	0.202	1.16919e-10	Ex-9	Mir9-3hg
1522	1.43651e-13	0.411816	0.778	0.635	3.31489e-09	Ex-9	Trps1
1523	4.35221e-13	0.408015	0.572	0.4	1.00432e-08	Ex-9	Ajap1
1524	2.27957e-07	0.407404	0.948	0.919	0.00526034	Ex-9	Tenm3
1525	9.3191e-26	0.405419	0.99	0.978	2.15047e-21	Ex-9	Macrod2
1526	2.39079e-13	0.404529	0.562	0.396	5.51699e-09	Ex-9	Gm14211
1527	5.73259e-23	0.403599	0.969	0.786	1.32285e-18	Ex-9	Arpp21
1528	1.94982e-31	0.401717	1	0.988	4.4994e-27	Ex-9	Ptprd
1529	3.68813e-14	0.40018	0.68	0.526	8.51073e-10	Ex-9	Cacna1g
1530	2.91795e-21	0.396219	0.954	0.913	6.73346e-17	Ex-9	Gpatch8
1531	1.50073e-14	0.395968	0.84	0.675	3.46308e-10	Ex-9	Clstn2
1532	1.16324e-18	0.393511	0.959	0.847	2.68429e-14	Ex-9	Slc24a3
1533	6.23296e-17	0.388242	0.871	0.744	1.43832e-12	Ex-9	Zfp462
1534	1.85289e-38	0.384554	0.304	0.065	4.27573e-34	Ex-9	Gm13919
1535	5.5857e-13	0.384097	0.613	0.466	1.28895e-08	Ex-9	Nrbp2
1536	6.33674e-11	0.383859	0.722	0.655	1.46227e-06	Ex-9	Pak7
1537	8.28924e-22	0.382176	0.928	0.926	1.91283e-17	Ex-9	Osbpl9
1538	7.43506e-12	0.38209	0.366	0.202	1.71571e-07	Ex-9	Gm3294
1539	2.3656e-18	0.375584	0.335	0.135	5.45886e-14	Ex-9	Pcdh8
1540	3.95324e-11	0.372734	0.423	0.259	9.12249e-07	Ex-9	St8sia4
1541	1.60639e-18	0.371406	0.979	0.784	3.7069e-14	Ex-9	Nell1
1542	0.000132825	0.370975	0.639	0.63	1	Ex-9	Ckb
1543	1.25821e-09	0.369089	0.531	0.415	2.90344e-05	Ex-9	Sestd1
1544	2.80183e-24	0.368193	0.32	0.101	6.4655e-20	Ex-9	Cabp7
1545	1.48755e-09	0.367512	0.706	0.626	3.43268e-05	Ex-9	Gm48091
1546	3.07406e-16	0.365721	0.562	0.323	7.0937e-12	Ex-9	Cpne9
1547	4.56349e-14	0.365613	0.83	0.752	1.05307e-09	Ex-9	Rgs7bp
1548	6.2296e-52	0.364362	0.222	0.025	1.43754e-47	Ex-9	Afap1l1
1549	1.2953e-17	0.362074	0.423	0.197	2.98904e-13	Ex-9	Gm2164
1550	5.61483e-22	0.361739	0.995	0.98	1.29568e-17	Ex-9	Lrrc4c
1551	6.4996e-80	1.62472	0.992	0.412	1.49985e-75	Ex-8	Rorb
1552	8.85382e-70	1.49944	0.992	0.491	2.04311e-65	Ex-8	Col25a1
1553	2.62979e-148	1.47343	0.805	0.096	6.0685e-144	Ex-8	Adam12
1554	5.91436e-72	1.46955	0.992	0.523	1.3648e-67	Ex-8	Ankfn1
1555	1.91454e-91	1.462	0.894	0.232	4.418e-87	Ex-8	Sntb1
1556	2.36809e-66	1.41181	1	0.723	5.46461e-62	Ex-8	Hdac9
1557	3.18285e-72	1.35711	0.992	0.419	7.34473e-68	Ex-8	Gfra1
1558	1.47138e-108	1.31261	0.919	0.19	3.39537e-104	Ex-8	Kitl
1559	4.75977e-55	1.2287	0.935	0.407	1.09836e-50	Ex-8	Gm20754
1560	3.47059e-52	1.1807	0.992	0.656	8.00873e-48	Ex-8	Erbb4
1561	1.21918e-65	1.17058	0.976	0.335	2.81337e-61	Ex-8	Bnc2
1562	6.46799e-54	1.16704	0.943	0.437	1.49255e-49	Ex-8	Cpne4
1563	1.53825e-62	1.14839	0.984	0.353	3.54966e-58	Ex-8	Lhfp
1564	2.06245e-145	1.08881	0.74	0.078	4.75931e-141	Ex-8	Nek11
1565	2.38754e-53	1.07335	0.943	0.39	5.5095e-49	Ex-8	Nxph1
1566	8.53253e-66	1.05034	1	0.988	1.96897e-61	Ex-8	Ptprd
1567	5.03256e-63	1.03464	0.764	0.204	1.16131e-58	Ex-8	Arap2
1568	3.78347e-48	1.0182	1	0.6	8.73074e-44	Ex-8	Gm28928
1569	2.21901e-39	0.988906	0.894	0.434	5.12059e-35	Ex-8	A330008L17Rik
1570	3.20628e-41	0.920143	0.943	0.683	7.39881e-37	Ex-8	Ncald
1571	5.32294e-46	0.914974	1	0.733	1.22832e-41	Ex-8	Pex5l
1572	4.21217e-55	0.912937	0.967	0.41	9.72e-51	Ex-8	Mgll
1573	1.17652e-39	0.90118	0.976	0.721	2.71493e-35	Ex-8	Cdh8
1574	1.26544e-39	0.848079	0.74	0.295	2.92012e-35	Ex-8	Tmem65
1575	4.91856e-44	0.84175	1	0.863	1.13501e-39	Ex-8	Robo2
1576	8.80748e-52	0.841144	0.764	0.221	2.03241e-47	Ex-8	4930509J09Rik
1577	2.24412e-39	0.817341	0.837	0.354	5.17854e-35	Ex-8	Ntng2
1578	1.42512e-37	0.796683	1	0.834	3.28862e-33	Ex-8	Kctd16
1579	1.33698e-46	0.791953	0.992	0.889	3.08522e-42	Ex-8	Plcb4
1580	3.33277e-38	0.791047	0.984	0.726	7.69069e-34	Ex-8	Cntn3
1581	1.45574e-30	0.790789	0.967	0.603	3.35927e-26	Ex-8	Kcnip1
1582	1.12361e-96	0.78187	0.74	0.113	2.59284e-92	Ex-8	Npl
1583	6.22154e-13	0.776856	0.992	0.899	1.43568e-08	Ex-8	Unc5d
1584	7.56667e-60	0.772083	0.675	0.15	1.74609e-55	Ex-8	Calb1
1585	3.90478e-85	0.762812	0.699	0.11	9.01067e-81	Ex-8	Pde5a
1586	7.131e-44	0.752475	0.935	0.42	1.64555e-39	Ex-8	Nrp2
1587	3.10744e-34	0.746478	0.967	0.59	7.17073e-30	Ex-8	Galnt14
1588	5.52959e-34	0.733435	0.699	0.258	1.27601e-29	Ex-8	Mei4
1589	2.84221e-34	0.727053	0.992	0.787	6.55868e-30	Ex-8	Nell1
1590	1.60296e-65	0.723586	0.618	0.113	3.69898e-61	Ex-8	Chst9
1591	1.53342e-36	0.72029	0.992	0.848	3.53853e-32	Ex-8	Slc24a3
1592	3.58583e-107	0.712972	0.659	0.078	8.27467e-103	Ex-8	Robo3
1593	1.67696e-28	0.70508	0.976	0.714	3.86975e-24	Ex-8	Gpc6
1594	1.35544e-28	0.70485	0.959	0.724	3.12782e-24	Ex-8	Zfp804a
1595	7.50506e-23	0.703891	0.846	0.462	1.73187e-18	Ex-8	Lmo3
1596	1.15311e-30	0.70296	0.911	0.512	2.66091e-26	Ex-8	Ptprz1
1597	8.24785e-49	0.6991	0.821	0.254	1.90327e-44	Ex-8	Prmt8
1598	6.16596e-29	0.697084	0.935	0.643	1.42286e-24	Ex-8	Plxdc2
1599	1.41996e-30	0.692301	0.992	0.718	3.27669e-26	Ex-8	Ptprt
1600	3.28229e-21	0.68813	1	0.935	7.57422e-17	Ex-8	Kcnip4
1601	1.25792e-37	0.687974	0.78	0.28	2.90278e-33	Ex-8	Maml2
1602	2.1179e-30	0.680578	0.984	0.796	4.88727e-26	Ex-8	Grm1
1603	1.69156e-28	0.665712	0.821	0.408	3.90344e-24	Ex-8	Bcl11a
1604	1.26902e-25	0.665	1	0.988	2.92839e-21	Ex-8	Tenm2
1605	3.90151e-37	0.662799	1	0.95	9.00311e-33	Ex-8	Cacna2d1
1606	2.35623e-29	0.656601	0.984	0.69	5.43724e-25	Ex-8	Adcy2
1607	9.05646e-28	0.643429	0.992	0.864	2.08987e-23	Ex-8	Oxr1
1608	2.72579e-31	0.641167	1	0.891	6.29003e-27	Ex-8	Cntn5
1609	2.18897e-39	0.640314	0.74	0.242	5.05126e-35	Ex-8	Tmem132d
1610	5.02581e-29	0.638221	0.976	0.775	1.15976e-24	Ex-8	Hs3st5
1611	1.27075e-88	0.625419	0.593	0.08	2.93239e-84	Ex-8	Rai14
1612	1.20044e-30	0.622172	0.805	0.369	2.77015e-26	Ex-8	4930419G24Rik
1613	4.12782e-20	0.615511	0.967	0.645	9.52536e-16	Ex-8	Egfem1
1614	1.65476e-39	0.611642	1	0.968	3.81853e-35	Ex-8	Dab1
1615	5.88359e-21	0.60845	0.715	0.386	1.3577e-16	Ex-8	Rps6ka5
1616	6.19685e-21	0.604026	0.545	0.222	1.42998e-16	Ex-8	Shox2
1617	2.66436e-33	0.602996	1	0.954	6.14829e-29	Ex-8	Lrrtm4
1618	9.4275e-28	0.594002	0.74	0.303	2.17549e-23	Ex-8	Sema5a
1619	9.72323e-28	0.593197	0.902	0.54	2.24373e-23	Ex-8	Srgap1
1620	3.68807e-24	0.590339	0.967	0.596	8.51058e-20	Ex-8	Lef1
1621	3.56362e-28	0.585427	0.724	0.29	8.22341e-24	Ex-8	Tmem196
1622	1.77159e-24	0.582547	0.967	0.757	4.08811e-20	Ex-8	Thsd7a
1623	2.05547e-24	0.579387	0.992	0.86	4.7432e-20	Ex-8	Runx1t1
1624	1.04402e-32	0.571875	0.683	0.235	2.40919e-28	Ex-8	Rftn1
1625	3.01216e-12	0.56993	0.691	0.464	6.95086e-08	Ex-8	Scg2
1626	4.57241e-39	0.5674	0.52	0.122	1.05513e-34	Ex-8	Fgf10
1627	4.05146e-31	0.566986	0.699	0.257	9.34914e-27	Ex-8	B3glct
1628	1.34126e-26	0.566193	0.992	0.84	3.09508e-22	Ex-8	Pdzrn4
1629	9.48627e-14	0.562059	0.976	0.859	2.18905e-09	Ex-8	B3galt1
1630	2.10255e-28	0.560769	0.805	0.392	4.85184e-24	Ex-8	Gm14211
1631	4.73743e-23	0.560044	0.911	0.618	1.09321e-18	Ex-8	Sema6a
1632	2.33042e-17	0.5491	0.813	0.514	5.37767e-13	Ex-8	Plcxd3
1633	1.65973e-24	0.539743	0.976	0.889	3.82999e-20	Ex-8	Hecw2
1634	6.55732e-28	0.529623	0.976	0.815	1.51317e-23	Ex-8	2010111I01Rik
1635	5.44184e-22	0.52937	0.878	0.52	1.25576e-17	Ex-8	2900055J20Rik
1636	5.05481e-21	0.524879	0.927	0.666	1.16645e-16	Ex-8	Tmtc1
1637	1.1882e-14	0.521761	1	0.919	2.74189e-10	Ex-8	Tenm3
1638	4.9689e-29	0.520353	0.675	0.253	1.14662e-24	Ex-8	Slc7a8
1639	2.40553e-27	0.519958	0.992	0.885	5.551e-23	Ex-8	Ccdc85a
1640	1.41882e-25	0.517924	0.667	0.266	3.27407e-21	Ex-8	Pard3b
1641	1.07927e-15	0.516319	0.821	0.538	2.49053e-11	Ex-8	Cdh7
1642	1.19896e-25	0.516028	0.569	0.207	2.76671e-21	Ex-8	Npas2
1643	7.87411e-19	0.515339	0.992	0.862	1.81703e-14	Ex-8	Grin2a
1644	1.65097e-21	0.512765	0.789	0.407	3.80979e-17	Ex-8	Pdzd2
1645	2.11016e-15	0.511127	0.886	0.637	4.86941e-11	Ex-8	Pitpnc1
1646	3.90856e-29	0.50692	1	0.971	9.01939e-25	Ex-8	Pcdh9
1647	1.65865e-23	0.504076	0.943	0.755	3.82751e-19	Ex-8	Dner
1648	9.14794e-14	0.497941	0.724	0.444	2.11098e-09	Ex-8	Gm15155
1649	1.26614e-17	0.497031	0.789	0.51	2.92174e-13	Ex-8	Kctd1
1650	6.01858e-19	0.495321	0.959	0.688	1.38885e-14	Ex-8	Fgf13
1651	1.38788e-16	0.494694	0.772	0.427	3.20266e-12	Ex-8	Galnt18
1652	1.69972e-118	0.494538	0.333	0.015	3.92228e-114	Ex-8	Gm12068
1653	4.03268e-22	0.494253	0.992	0.902	9.30582e-18	Ex-8	Cntnap5a
1654	6.26588e-21	0.493264	0.919	0.609	1.44591e-16	Ex-8	Rbms1
1655	5.41651e-35	0.493205	1	0.986	1.24991e-30	Ex-8	Mdga2
1656	8.97731e-16	0.486437	0.959	0.873	2.0716e-11	Ex-8	Pde10a
1657	5.9507e-17	0.48584	0.78	0.445	1.37318e-12	Ex-8	Samd5
1658	1.92184e-20	0.483828	0.992	0.911	4.43485e-16	Ex-8	Galntl6
1659	2.08075e-27	0.481623	0.699	0.277	4.80154e-23	Ex-8	Gm3764
1660	1.20301e-22	0.477634	0.829	0.386	2.77607e-18	Ex-8	Prkd1
1661	1.83371e-30	0.471046	0.528	0.151	4.23148e-26	Ex-8	Efnb2
1662	1.69384e-18	0.470496	0.699	0.351	3.9087e-14	Ex-8	Klhl5
1663	7.52386e-23	0.469796	1	0.904	1.73621e-18	Ex-8	Fat3
1664	8.44436e-20	0.468277	0.976	0.827	1.94862e-15	Ex-8	Kcnq3
1665	7.5384e-19	0.466659	0.902	0.651	1.73956e-14	Ex-8	Ppm1h
1666	1.56071e-15	0.466389	0.984	0.862	3.6015e-11	Ex-8	Unc5c
1667	1.65795e-13	0.46226	0.967	0.647	3.8259e-09	Ex-8	Ebf1
1668	2.36022e-143	0.452718	0.26	0.006	5.44645e-139	Ex-8	Vip
1669	2.60443e-19	0.45227	0.894	0.594	6.00998e-15	Ex-8	Epha4
1670	1.8758e-15	0.450463	0.878	0.635	4.32859e-11	Ex-8	Trps1
1671	3.50146e-24	0.44905	0.537	0.183	8.07998e-20	Ex-8	Sgk3
1672	3.33366e-19	0.448598	0.87	0.556	7.69276e-15	Ex-8	Sorcs2
1673	1.44702e-16	0.447738	0.943	0.768	3.33915e-12	Ex-8	Rab3c
1674	7.07539e-27	0.442271	0.496	0.146	1.63272e-22	Ex-8	Atp10a
1675	7.3886e-10	0.436739	0.683	0.482	1.70499e-05	Ex-8	Syt4
1676	2.43659e-21	0.434507	0.992	0.946	5.62268e-17	Ex-8	Lhfpl3
1677	2.44346e-42	0.429677	0.472	0.091	5.63852e-38	Ex-8	Gpc3
1678	5.03862e-13	0.429105	0.585	0.297	1.16271e-08	Ex-8	4930587E11Rik
1679	1.93274e-17	0.428582	0.984	0.89	4.45999e-13	Ex-8	Tmeff2
1680	4.42538e-16	0.428377	0.561	0.263	1.0212e-11	Ex-8	Gm42303
1681	2.13902e-15	0.428064	0.593	0.291	4.936e-11	Ex-8	Grb14
1682	9.43118e-19	0.427111	1	0.713	2.17634e-14	Ex-8	Cntn6
1683	1.29514e-14	0.426053	0.821	0.5	2.98867e-10	Ex-8	Zmat4
1684	6.5029e-13	0.418896	0.829	0.576	1.50061e-08	Ex-8	Wscd2
1685	2.48435e-15	0.418657	0.886	0.591	5.73288e-11	Ex-8	Unc13b
1686	1.59177e-18	0.418335	0.992	0.75	3.67316e-14	Ex-8	Dscaml1
1687	6.27772e-14	0.417772	1	0.868	1.44865e-09	Ex-8	Pcdh15
1688	5.87551e-14	0.415069	0.927	0.733	1.35583e-09	Ex-8	Esrrg
1689	3.86465e-12	0.414271	0.829	0.552	8.91806e-08	Ex-8	Chrm2
1690	3.86687e-20	0.411903	1	0.98	8.92319e-16	Ex-8	Lrrc4c
1691	6.45296e-37	0.409857	0.341	0.057	1.48909e-32	Ex-8	Myo1e
1692	4.78067e-11	0.408325	0.951	0.871	1.10319e-06	Ex-8	Rit2
1693	4.81968e-12	0.408274	0.602	0.331	1.11219e-07	Ex-8	Htr1f
1694	5.3274e-12	0.400756	0.78	0.539	1.22935e-07	Ex-8	Cpeb2
1695	1.19512e-13	0.399415	0.748	0.522	2.75786e-09	Ex-8	Cap2
1696	1.52201e-09	0.39843	0.813	0.671	3.51219e-05	Ex-8	Rap1gds1
1697	3.04724e-14	0.395966	0.683	0.38	7.03181e-10	Ex-8	Tmem150c
1698	3.90683e-18	0.395204	1	0.943	9.01539e-14	Ex-8	Dmd
1699	6.2834e-14	0.391194	0.659	0.353	1.44996e-09	Ex-8	Gm44593
1700	4.66326e-22	0.389118	1	0.987	1.07609e-17	Ex-8	Nlgn1
1701	2.47909e-21	0.386553	0.472	0.153	5.72075e-17	Ex-8	Gda
1702	1.99708e-09	0.381447	0.87	0.691	4.60845e-05	Ex-8	Gm26905
1703	4.40115e-14	0.380583	0.927	0.84	1.01561e-09	Ex-8	Arid1b
1704	5.70127e-24	0.380006	0.423	0.121	1.31562e-19	Ex-8	Rasgrp1
1705	1.34196e-15	0.378274	0.789	0.438	3.09671e-11	Ex-8	Flrt2
1706	2.84946e-12	0.377001	0.919	0.795	6.57542e-08	Ex-8	Rcan2
1707	4.7464e-18	0.37688	1	0.924	1.09528e-13	Ex-8	Dpp10
1708	1.0733e-11	0.374634	0.967	0.804	2.47674e-07	Ex-8	2021-03-01
1709	2.13649e-15	0.373932	0.984	0.904	4.93017e-11	Ex-8	Inpp4b
1710	3.19162e-13	0.370629	0.959	0.721	7.36499e-09	Ex-8	Spock1
1711	1.57038e-10	0.370584	0.886	0.664	3.62382e-06	Ex-8	Gabra2
1712	6.00259e-15	0.370359	0.455	0.191	1.38516e-10	Ex-8	St3gal6
1713	6.84912e-19	0.369793	1	0.977	1.5805e-14	Ex-8	Il1rapl1
1714	2.99743e-13	0.369535	0.423	0.168	6.91688e-09	Ex-8	Maf
1715	8.44586e-11	0.369395	0.65	0.396	1.94897e-06	Ex-8	Ptchd1
1716	1.24383e-12	0.369046	0.724	0.447	2.87025e-08	Ex-8	Gprin3
1717	1.38847e-10	0.368326	0.862	0.608	3.20404e-06	Ex-8	Trpc5
1718	1.16445e-10	0.366172	0.732	0.526	2.68709e-06	Ex-8	Pdcd4
1719	1.8424e-12	0.364265	0.854	0.617	4.25151e-08	Ex-8	Sez6l
1720	5.92128e-18	0.3632	0.976	0.875	1.3664e-13	Ex-8	Cttnbp2
1721	2.40716e-15	0.363039	0.512	0.222	5.55476e-11	Ex-8	Lhx2
1722	1.69304e-11	0.361734	0.959	0.755	3.90686e-07	Ex-8	Nkain3
1723	1.24715e-10	0.360956	0.886	0.772	2.87793e-06	Ex-8	Rsrc1
1724	1.54536e-15	0.360134	0.992	0.895	3.56607e-11	Ex-8	Grip1
1725	1.17689e-11	0.358384	0.992	0.882	2.7158e-07	Ex-8	Cdk14
1726	6.69647e-20	0.356983	0.488	0.162	1.54528e-15	Ex-8	Tmem132c
1727	6.86364e-13	0.356297	0.805	0.473	1.58385e-08	Ex-8	Man2a1
1728	9.30354e-07	0.354808	0.789	0.7	0.0214688	Ex-8	Stmn2
1729	3.45094e-14	0.353953	0.967	0.789	7.96339e-10	Ex-8	Arpp21
1730	5.41134e-12	0.35379	0.667	0.4	1.24872e-07	Ex-8	Ajap1
1731	1.34531e-11	0.353554	0.862	0.652	3.10443e-07	Ex-8	Pak7
1732	3.09704e-12	0.349871	0.984	0.878	7.14674e-08	Ex-8	Sorbs2
1733	3.87594e-46	0.347881	0.333	0.045	8.94412e-42	Ex-8	0610040J01Rik
1734	1.28994e-19	0.347295	0.423	0.136	2.97665e-15	Ex-8	1810041L15Rik
1735	9.45839e-09	0.346889	0.829	0.622	0.000218262	Ex-8	Sh3kbp1
1736	3.811e-18	0.346378	0.407	0.136	8.79427e-14	Ex-8	Pcdh8
1737	3.27274e-13	0.344559	0.797	0.453	7.55217e-09	Ex-8	Bcl11b
1738	1.05374e-13	0.343619	0.805	0.483	2.43162e-09	Ex-8	Syndig1
1739	1.81029e-19	0.341421	0.797	0.362	4.17743e-15	Ex-8	Ebf2
1740	5.40478e-15	0.341246	0.496	0.206	1.24721e-10	Ex-8	Gm37459
1741	7.21858e-15	0.340933	0.992	0.923	1.66576e-10	Ex-8	Ppfia2
1742	2.31199e-19	0.340036	1	0.989	5.33515e-15	Ex-8	Dlg2
1743	1.72105e-10	0.338735	0.935	0.744	3.9715e-06	Ex-8	Tspan5
1744	2.1823e-11	0.337141	0.935	0.744	5.03588e-07	Ex-8	Nyap2
1745	1.86636e-10	0.336389	0.667	0.412	4.30681e-06	Ex-8	Shc3
1746	2.80498e-09	0.335362	0.48	0.269	6.47277e-05	Ex-8	Mtus1
1747	1.92198e-10	0.331647	0.976	0.742	4.43516e-06	Ex-8	Cep112
1748	4.29597e-18	0.331388	0.472	0.175	9.91337e-14	Ex-8	Gpr63
1749	7.55696e-11	0.330923	0.976	0.937	1.74384e-06	Ex-8	Snap25
1750	6.34274e-05	0.330893	0.772	0.714	1	Ex-8	Kcnq5

## Sheet: Inhibitory_neuron_subtype_DEGs
Table S2: Top200 differentially expressed genes among 10 inhibitory neuron subtypes
	p_val	avg_logFC	pct.1	pct.2	p_val_adj	cluster	gene
1	2.78e-151	1.40613	0.987	0.566	6.4e-147	In-6	Ntng1
2	2.94e-141	1.355	0.984	0.756	6.79e-137	In-6	Nkain3
3	4.62e-211	1.31505	0.582	0.066	1.07e-206	In-6	Meis1
4	1.99e-106	1.30943	0.661	0.237	4.6e-102	In-6	Gulp1
5	2.65e-136	1.27797	0.822	0.268	6.12e-132	In-6	Cpne4
6	3.59e-115	1.18484	0.935	0.499	8.27e-111	In-6	Efna5
7	1.81e-84	1.14441	0.841	0.53	4.18e-80	In-6	Olfm3
8	6.37e-133	1.13437	0.984	0.589	1.47e-128	In-6	Ptprm
9	5.47e-108	1.13303	0.621	0.16	1.26e-103	In-6	Gm38505
10	1.44e-144	1.12115	1	0.569	3.33e-140	In-6	Adarb2
11	1.24e-94	1.10523	0.715	0.318	2.86e-90	In-6	Vwc2
12	5.91e-136	1.0966	0.987	0.751	1.36e-131	In-6	Gpc6
13	2.56e-113	0.945974	0.773	0.292	5.91e-109	In-6	Fat4
14	3.31e-99	0.937002	0.984	0.695	7.64e-95	In-6	Car10
15	8.02e-111	0.921072	0.995	0.885	1.85e-106	In-6	Grip1
16	3.12e-117	0.868226	1	0.955	7.2e-113	In-6	Tenm2
17	4.61e-75	0.859444	0.94	0.555	1.06e-70	In-6	Zfp804b
18	1.05e-62	0.840165	0.58	0.24	2.42e-58	In-6	Prex2
19	3.98e-76	0.838499	0.843	0.57	9.19e-72	In-6	Epha4
20	1.5e-58	0.827302	0.708	0.387	3.45e-54	In-6	Cdh11
21	1.92e-54	0.823226	0.937	0.714	4.42e-50	In-6	Pcdh15
22	2.19e-86	0.817352	0.671	0.258	5.06e-82	In-6	Oprm1
23	1.18e-64	0.806158	0.927	0.813	2.72e-60	In-6	Slc24a3
24	1.06e-73	0.79779	0.721	0.362	2.44e-69	In-6	Sorcs2
25	6.96e-75	0.795328	0.89	0.779	1.61e-70	In-6	Cpe
26	3.38e-60	0.743523	0.768	0.446	7.8e-56	In-6	Nrp2
27	8.33e-39	0.743123	0.765	0.503	1.92e-34	In-6	Gm15398
28	5.9e-71	0.742772	0.906	0.677	1.36e-66	In-6	Grm1
29	2.19e-128	0.741996	1	0.983	5.06e-124	In-6	Nrg3
30	2.02e-55	0.724008	0.755	0.456	4.67e-51	In-6	Flrt2
31	3.61e-70	0.719476	0.977	0.782	8.33e-66	In-6	Grm8
32	1.02e-54	0.71605	0.862	0.609	2.35e-50	In-6	Zfp804a
33	6.97e-35	0.699611	0.95	0.904	1.61e-30	In-6	Tenm3
34	1.1e-54	0.69291	0.488	0.188	2.55e-50	In-6	Kcnh8
35	1.08e-80	0.687123	0.982	0.829	2.48e-76	In-6	Hdac9
36	2.39e-75	0.684535	0.582	0.202	5.52e-71	In-6	Plch1
37	5.22e-80	0.676373	0.739	0.293	1.2e-75	In-6	Lhfp
38	5.05e-64	0.664363	0.961	0.87	1.16e-59	In-6	Nrg3os
39	1.4e-45	0.664251	0.778	0.5	3.23e-41	In-6	D030068K23Rik
40	3.58e-57	0.662397	0.872	0.687	8.27e-53	In-6	Tln2
41	7.81e-55	0.655168	0.624	0.274	1.8e-50	In-6	Gm30382
42	1.01e-55	0.654025	0.856	0.589	2.32e-51	In-6	Adgrl2
43	1.52e-37	0.653207	0.478	0.225	3.52e-33	In-6	Sntg2
44	1.49e-48	0.651039	0.914	0.694	3.43e-44	In-6	Fam19a2
45	1.09e-72	0.642277	0.995	0.73	2.52e-68	In-6	Zfhx3
46	6.01e-58	0.63403	0.916	0.668	1.39e-53	In-6	Grm3
47	2.08e-80	0.633648	0.995	0.961	4.8e-76	In-6	Grm7
48	4.25e-136	0.625552	0.389	0.04	9.82e-132	In-6	Npffr1
49	1.71e-45	0.622013	0.849	0.658	3.94e-41	In-6	Caln1
50	6.71e-46	0.620469	0.762	0.506	1.55e-41	In-6	Rbms1
51	5.57e-36	0.612436	0.593	0.329	1.29e-31	In-6	Klhl1
52	7.29e-55	0.610347	0.935	0.732	1.68e-50	In-6	Cntnap5b
53	1.63e-29	0.60773	0.399	0.188	3.77e-25	In-6	Glra1
54	1.52e-47	0.606764	0.958	0.757	3.51e-43	In-6	Dcc
55	2.06e-58	0.606531	0.977	0.849	4.76e-54	In-6	Gm20642
56	1.94e-41	0.600978	0.29	0.081	4.47e-37	In-6	Tiam2
57	4.62e-32	0.591158	0.768	0.55	1.07e-27	In-6	Pdzrn4
58	3.84e-42	0.587933	0.812	0.567	8.85e-38	In-6	A830018L16Rik
59	1.89e-62	0.586083	0.373	0.093	4.37e-58	In-6	Fibcd1
60	6.05e-50	0.577483	0.969	0.813	1.4e-45	In-6	Ncam2
61	1.32e-21	0.570591	0.54	0.321	3.05e-17	In-6	Gm32647
62	1.43e-32	0.570117	0.768	0.543	3.31e-28	In-6	Shisa9
63	3.73e-38	0.568426	0.885	0.66	8.61e-34	In-6	Pcdh11x
64	6.74e-53	0.567842	0.966	0.755	1.56e-48	In-6	Lhfpl3
65	2.61e-29	0.560206	0.681	0.483	6.03e-25	In-6	Vav3
66	3.27e-40	0.542412	0.885	0.731	7.56e-36	In-6	Plxdc2
67	3.97e-45	0.531399	0.462	0.182	9.16e-41	In-6	Fat1
68	5.59e-35	0.518714	0.708	0.456	1.29e-30	In-6	Pex5l
69	1.87e-34	0.517741	0.697	0.429	4.31e-30	In-6	Galnt14
70	1.57e-28	0.513133	0.326	0.132	3.62e-24	In-6	Syt6
71	3.05e-35	0.509679	0.543	0.28	7.05e-31	In-6	Lmo1
72	3.27e-48	0.499695	0.94	0.647	7.55e-44	In-6	Pdzd2
73	7.27e-26	0.499306	0.71	0.534	1.68e-21	In-6	Slc2a13
74	2.33e-10	0.499026	0.439	0.318	5.38e-06	In-6	Sox5
75	5.07e-18	0.498053	0.527	0.369	1.17e-13	In-6	Serpini1
76	2.43e-38	0.494282	0.744	0.51	5.62e-34	In-6	Cux2
77	4.7e-19	0.493218	0.342	0.184	1.08e-14	In-6	Lrrn1
78	5.55e-35	0.491216	0.854	0.661	1.28e-30	In-6	Hs3st5
79	2.86e-44	0.488757	0.948	0.634	6.61e-40	In-6	Otx2os1
80	4.38e-21	0.48606	0.564	0.389	1.01e-16	In-6	Ptpro
81	6.01e-40	0.484839	0.984	0.956	1.39e-35	In-6	Pcdh7
82	1.72e-45	0.484795	0.366	0.117	3.97e-41	In-6	Ipcef1
83	6.78e-56	0.479212	0.324	0.074	1.57e-51	In-6	Lrp4
84	1.09e-22	0.478937	0.431	0.236	2.52e-18	In-6	Col11a1
85	2.59e-26	0.476727	0.499	0.304	5.99e-22	In-6	Rgs8
86	5.58e-25	0.476343	0.567	0.338	1.29e-20	In-6	Tmcc3
87	2.56e-17	0.469695	0.734	0.594	5.91e-13	In-6	Stxbp6
88	1.78e-55	0.469195	0.248	0.043	4.12e-51	In-6	AC163354.1
89	1.63e-41	0.467412	0.94	0.814	3.76e-37	In-6	Kcnq3
90	3.41e-36	0.464449	0.969	0.857	7.86e-32	In-6	Dpp10
91	1.58e-30	0.457538	0.799	0.629	3.65e-26	In-6	Ncald
92	2.13e-36	0.456356	0.997	0.994	4.92e-32	In-6	Rora
93	8.86e-61	0.45459	0.997	0.958	2.04e-56	In-6	Lrrc4c
94	3.85e-29	0.45161	0.888	0.784	8.88e-25	In-6	Mllt3
95	1.39e-53	0.45141	0.342	0.087	3.22e-49	In-6	Fam163a
96	2.4e-29	0.443397	0.172	0.039	5.53e-25	In-6	Sulf1
97	5.81e-27	0.442718	0.59	0.383	1.34e-22	In-6	Fndc3b
98	2.23e-26	0.441847	0.577	0.37	5.15e-22	In-6	Ajap1
99	4.5e-50	0.440271	0.958	0.712	1.04e-45	In-6	Tmem108
100	6.52e-26	0.439644	0.687	0.445	1.5e-21	In-6	Synpr
101	1.16e-26	0.439537	0.95	0.765	2.67e-22	In-6	Unc5d
102	6.91e-08	0.436062	0.389	0.295	0.00159441	In-6	Vwc2l
103	1.7e-29	0.435627	0.384	0.17	3.93e-25	In-6	Ldlrad3
104	2.62e-20	0.435465	0.658	0.461	6.05e-16	In-6	Tox
105	1.68e-34	0.419852	0.945	0.835	3.87e-30	In-6	Tnr
106	2.73e-19	0.418819	0.794	0.653	6.3e-15	In-6	Plcl1
107	6.09e-08	0.418007	0.653	0.6	0.00140605	In-6	Grik1
108	8.25e-18	0.417837	0.546	0.388	1.9e-13	In-6	Htr4
109	1.18e-22	0.413041	0.619	0.414	2.72e-18	In-6	Kif26b
110	2.99e-50	0.409442	0.366	0.105	6.9e-46	In-6	Irx2
111	4.75e-30	0.403621	0.875	0.687	1.1e-25	In-6	Zfhx4
112	3.58e-13	0.403296	0.441	0.317	8.27e-09	In-6	Akap13
113	5.68e-22	0.401128	0.742	0.575	1.31e-17	In-6	Epha7
114	8.48e-31	0.400697	0.88	0.826	1.96e-26	In-6	Agap1
115	8.25e-62	0.392557	0.261	0.043	1.9e-57	In-6	Dmbx1
116	4.82e-20	0.3912	0.546	0.351	1.11e-15	In-6	Banf2
117	6.76e-39	0.391165	0.987	0.933	1.56e-34	In-6	Robo2
118	4.3e-36	0.390138	0.854	0.563	9.93e-32	In-6	Rbms3
119	4.83e-13	0.389859	0.875	0.759	1.12e-08	In-6	Tshz2
120	3.68e-19	0.388464	0.943	0.852	8.49e-15	In-6	Slc8a1
121	2.29e-16	0.383094	0.619	0.48	5.28e-12	In-6	Pip5k1b
122	8.56e-18	0.37958	0.765	0.651	1.97e-13	In-6	Gm48091
123	2.16e-26	0.377915	0.329	0.141	4.98e-22	In-6	Gm3294
124	3.23e-17	0.374674	0.728	0.611	7.46e-13	In-6	Galnt18
125	1.75e-27	0.373485	0.838	0.607	4.03e-23	In-6	Pbx3
126	9.24e-18	0.372572	0.838	0.777	2.13e-13	In-6	Nr3c2
127	2.55e-38	0.372307	0.279	0.079	5.89e-34	In-6	Drd2
128	3.26e-16	0.370708	0.574	0.442	7.52e-12	In-6	Brinp2
129	2.62e-13	0.364895	0.392	0.261	6.04e-09	In-6	Sipa1l2
130	4.2e-31	0.355965	0.971	0.969	9.69e-27	In-6	Cacna1d
131	7.99e-51	0.35465	0.251	0.049	1.84e-46	In-6	Irx1
132	1.02e-21	0.353093	0.854	0.803	2.35e-17	In-6	Csrnp3
133	8.12e-23	0.353059	0.869	0.821	1.87e-18	In-6	Kcnn2
134	1.07e-10	0.352268	0.295	0.177	2.47e-06	In-6	Sv2c
135	1.6e-09	0.348121	0.457	0.361	3.7e-05	In-6	Sdc2
136	2.28e-15	0.34401	0.642	0.496	5.25e-11	In-6	Galnt17
137	9.25e-17	0.338524	0.697	0.547	2.13e-12	In-6	Clstn2
138	8.64e-30	0.337138	0.977	0.973	1.99e-25	In-6	Nbea
139	7.2e-29	0.333841	0.995	0.99	1.66e-24	In-6	Il1rapl1
140	2.22e-12	0.328051	0.41	0.277	5.11e-08	In-6	Slc7a8
141	2.14e-14	0.323549	0.747	0.645	4.95e-10	In-6	Pde8b
142	5.33e-19	0.322101	0.308	0.148	1.23e-14	In-6	Gm27008
143	2.61e-08	0.321852	0.574	0.528	0.000602	In-6	Rgl1
144	6.18e-58	0.31957	0.185	0.021	1.43e-53	In-6	Pkp2
145	8.07e-24	0.318678	0.77	0.509	1.86e-19	In-6	Cntn3
146	3.41e-30	0.314326	0.995	0.99	7.87e-26	In-6	Gria4
147	1.63e-11	0.311496	0.7	0.602	3.77e-07	In-6	Sema6a
148	6.66e-10	0.310838	0.431	0.321	1.54e-05	In-6	Hlf
149	7.4e-19	0.310425	0.227	0.091	1.71e-14	In-6	Gm12236
150	8.74e-21	0.309769	0.916	0.847	2.02e-16	In-6	Ssbp2
151	3.11e-24	0.30917	0.339	0.15	7.18e-20	In-6	Sez6
152	2.54e-09	0.308178	0.413	0.296	5.85e-05	In-6	Eda
153	2.43e-10	0.307152	0.627	0.573	5.61e-06	In-6	Xpr1
154	2.48e-11	0.305861	0.473	0.341	5.71e-07	In-6	Nell2
155	1.12e-14	0.301615	0.606	0.44	2.58e-10	In-6	Tox3
156	4.9e-31	0.301545	0.172	0.037	1.13e-26	In-6	Kitl
157	1.11e-09	0.29774	0.807	0.793	2.56e-05	In-6	Cdh2
158	7.62e-31	0.297375	1	0.978	1.76e-26	In-6	Lingo2
159	6.27e-16	0.296463	0.178	0.065	1.45e-11	In-6	Shroom3
160	2.12e-10	0.29558	0.507	0.378	4.9e-06	In-6	Ano3
161	4.79e-12	0.293675	0.752	0.714	1.1e-07	In-6	Nmnat2
162	1.47e-08	0.292855	0.715	0.648	0.000340172	In-6	Pid1
163	7.63e-11	0.289556	0.53	0.44	1.76e-06	In-6	Adk
164	3.83e-12	0.289302	0.731	0.568	8.84e-08	In-6	Sema6d
165	4.16e-22	0.289169	0.997	0.945	9.61e-18	In-6	Nkain2
166	7.26e-13	0.288986	0.919	0.859	1.68e-08	In-6	Prickle1
167	6.46e-11	0.288217	0.277	0.161	1.49e-06	In-6	Cacng4
168	1.75e-10	0.287905	0.616	0.52	4.03e-06	In-6	Zdhhc14
169	1.79e-06	0.285609	0.251	0.173	0.0411979	In-6	Ubtd2
170	3.84e-10	0.284953	0.42	0.306	8.87e-06	In-6	Ociad2
171	4.26e-11	0.284666	0.833	0.788	9.84e-07	In-6	Thsd7a
172	3.65e-10	0.281804	0.488	0.378	8.43e-06	In-6	Chst11
173	1.79e-10	0.280736	0.277	0.163	4.12e-06	In-6	4930567K20Rik
174	9.33e-09	0.277181	0.564	0.472	0.000215254	In-6	Arnt2
175	1.02e-07	0.275325	0.59	0.543	0.00235288	In-6	9330182L06Rik
176	4.8e-12	0.275131	0.339	0.205	1.11e-07	In-6	Hunk
177	5.88e-15	0.273805	0.867	0.819	1.36e-10	In-6	Camk2d
178	1.92e-15	0.27344	0.893	0.811	4.42e-11	In-6	Cdh12
179	3.82e-11	0.272705	0.869	0.844	8.81e-07	In-6	Hecw2
180	8.69e-14	0.272666	0.966	0.861	2e-09	In-6	Cntnap5a
181	2.87e-12	0.272195	0.204	0.095	6.63e-08	In-6	1700016K05Rik
182	2.14e-18	0.270781	0.992	0.975	4.93e-14	In-6	Grik2
183	8.86e-06	0.270164	0.679	0.616	0.204511	In-6	Gm26883
184	0.0001929	0.268532	0.402	0.347	1	In-6	Pacrg
185	1.48e-93	0.267397	0.175	0.006	3.41e-89	In-6	Gm16141
186	2.81e-18	0.263291	0.937	0.853	6.48e-14	In-6	Luzp2
187	3.18e-26	0.262927	0.997	0.954	7.35e-22	In-6	Dab1
188	4.33e-14	0.26256	0.191	0.08	9.99e-10	In-6	Gm13919
189	3.18e-24	0.262549	0.997	0.987	7.35e-20	In-6	Ptprd
190	5.53e-10	0.26118	0.397	0.265	1.28e-05	In-6	Rftn1
191	1.84e-07	0.260476	0.543	0.462	0.00424165	In-6	Srgap1
192	1.51e-10	0.258684	0.804	0.729	3.47e-06	In-6	Thsd7b
193	2.53e-15	0.256652	0.18	0.07	5.83e-11	In-6	Fndc1
194	2.05e-11	0.254964	0.295	0.171	4.73e-07	In-6	2021-03-03
195	3.16e-12	0.253449	0.875	0.829	7.29e-08	In-6	Zbtb20
196	3.07e-12	0.252065	0.36	0.221	7.09e-08	In-6	Rasa4
197	2.22e-11	0.250189	0.718	0.65	5.11e-07	In-6	Iqsec3
198	9.53e-35	1.52228	0.395	0.146	2.2e-30	In-5	Cacna2d1
199	2.26e-72	1.44884	0.952	0.753	5.22e-68	In-5	Sgcd
200	2.63e-183	1.44381	0.9	0.213	6.07e-179	In-5	Spon1
201	8.94e-92	1.20132	0.827	0.286	2.06e-87	In-5	Cpne4
202	1.09e-95	1.14697	0.982	0.567	2.51e-91	In-5	Kctd8
203	3.5e-56	1.08649	0.779	0.468	8.08e-52	In-5	Zeb2
204	6.64e-43	1.02556	0.472	0.168	1.53e-38	In-5	Dach1
205	1.65e-81	0.962328	0.989	0.852	3.8e-77	In-5	Luzp2
206	3.43e-77	0.948519	0.937	0.504	7.92e-73	In-5	Foxp2
207	3.33e-33	0.947075	0.738	0.525	7.69e-29	In-5	Sdk1
208	2.43e-24	0.875926	0.705	0.491	5.61e-20	In-5	Il1rapl2
209	3.34e-72	0.849696	0.919	0.493	7.7e-68	In-5	Adcy2
210	1.49e-52	0.848641	0.9	0.763	3.44e-48	In-5	Elmo1
211	3.9e-67	0.772555	0.945	0.649	8.99e-63	In-5	Fam189a1
212	1.06e-50	0.765544	0.542	0.194	2.44e-46	In-5	Chn2
213	1.32e-37	0.753047	0.782	0.5	3.06e-33	In-5	C130073E24Rik
214	5.83e-50	0.74946	0.583	0.224	1.34e-45	In-5	Ankfn1
215	4.79e-48	0.735271	0.801	0.427	1.1e-43	In-5	Pld5
216	6.07e-50	0.728017	0.399	0.106	1.4e-45	In-5	Smoc1
217	7.54e-46	0.722257	0.712	0.343	1.74e-41	In-5	Sema5a
218	2.04e-33	0.713456	0.701	0.395	4.71e-29	In-5	4930555F03Rik
219	5.35e-17	0.695484	0.834	0.683	1.24e-12	In-5	Grm3
220	1.09e-41	0.692474	0.69	0.356	2.52e-37	In-5	Arhgap24
221	4.76e-10	0.68569	0.454	0.31	1.1e-05	In-5	Erbb4
222	1.48e-107	0.680928	0.472	0.068	3.42e-103	In-5	Itga8
223	3.02e-30	0.674792	1	0.891	6.97e-26	In-5	Kcnip4
224	5.11e-36	0.674364	0.97	0.888	1.18e-31	In-5	Etl4
225	1.72e-35	0.657681	0.605	0.282	3.97e-31	In-5	Gm45321
226	1.42e-52	0.654108	0.387	0.093	3.28e-48	In-5	Sema3e
227	6.17e-27	0.646259	0.472	0.229	1.42e-22	In-5	Epb41l5
228	5.44e-37	0.639317	0.911	0.755	1.25e-32	In-5	Ext1
229	7.47e-50	0.635759	0.967	0.815	1.72e-45	In-5	Spock3
230	4.3e-46	0.633599	0.292	0.06	9.93e-42	In-5	Plce1
231	2.34e-38	0.629583	0.745	0.447	5.4e-34	In-5	Sh3rf3
232	1.18e-50	0.626818	0.351	0.076	2.71e-46	In-5	Gli3
233	3.05e-27	0.624462	0.399	0.161	7.03e-23	In-5	Glra2
234	2.8e-59	0.624245	0.557	0.179	6.45e-55	In-5	Gm32036
235	2.07e-41	0.620672	0.601	0.249	4.77e-37	In-5	Grik3
236	5.19e-12	0.618927	0.52	0.382	1.2e-07	In-5	Pard3b
237	2.86e-18	0.618502	0.664	0.477	6.6e-14	In-5	Fstl5
238	1.05e-42	0.605208	0.587	0.241	2.42e-38	In-5	Lgr5
239	6.76e-46	0.60262	0.675	0.303	1.56e-41	In-5	Xylt1
240	8.22e-44	0.601412	0.97	0.788	1.9e-39	In-5	Khdrbs2
241	2.63e-21	0.598397	0.79	0.578	6.07e-17	In-5	Rbms3
242	5.05e-30	0.58805	0.55	0.263	1.16e-25	In-5	Gm45323
243	1.13e-39	0.584096	0.587	0.259	2.61e-35	In-5	Frmd6
244	5.14e-21	0.577322	0.653	0.44	1.19e-16	In-5	Maml2
245	8.38e-32	0.574433	0.69	0.366	1.93e-27	In-5	Kcnt2
246	1.9e-30	0.564911	0.605	0.309	4.38e-26	In-5	Gm2516
247	3.7e-23	0.54906	0.841	0.657	8.53e-19	In-5	Rmst
248	6.2e-36	0.543768	0.28	0.07	1.43e-31	In-5	Gm2164
249	5.26e-30	0.532223	0.568	0.283	1.21e-25	In-5	Pola1
250	9.32e-35	0.530535	0.535	0.229	2.15e-30	In-5	Sntg2
251	4.92e-40	0.521902	0.343	0.09	1.14e-35	In-5	Egflam
252	5.78e-24	0.516519	0.812	0.636	1.33e-19	In-5	Unc13c
253	2.41e-25	0.514251	0.904	0.729	5.56e-21	In-5	Epha5
254	3.66e-35	0.512018	0.97	0.843	8.45e-31	In-5	Epha6
255	6.26e-15	0.508713	0.827	0.825	1.44e-10	In-5	Mmp16
256	2.36e-20	0.504574	0.723	0.45	5.45e-16	In-5	Synpr
257	0.00165	0.500025	0.458	0.393	1	In-5	Rorb
258	1.38e-19	0.496558	0.502	0.274	3.19e-15	In-5	Shisa6
259	1.42e-34	0.493299	0.886	0.51	3.29e-30	In-5	Htr2c
260	1.18e-34	0.492773	0.919	0.626	2.71e-30	In-5	Lef1
261	2.62e-08	0.490287	0.491	0.37	0.000604195	In-5	A330008L17Rik
262	7.39e-26	0.489743	0.852	0.598	1.7e-21	In-5	Adgrl2
263	1.59e-32	0.477105	0.915	0.836	3.67e-28	In-5	Nrcam
264	4.4e-29	0.472043	0.697	0.399	1.02e-24	In-5	Cdh11
265	1.36e-48	0.471734	0.395	0.098	3.14e-44	In-5	Kit
266	1.92e-17	0.469411	0.376	0.186	4.42e-13	In-5	Bcl11b
267	6.53e-93	0.468911	0.328	0.034	1.51e-88	In-5	Ecel1
268	4.24e-33	0.465874	0.708	0.338	9.79e-29	In-5	Tfap2b
269	3.39e-33	0.450204	0.424	0.157	7.83e-29	In-5	Mpped1
270	5.89e-144	0.444645	0.229	0.003	1.36e-139	In-5	Igsf5
271	1.47e-18	0.439969	0.483	0.286	3.38e-14	In-5	Fam204a
272	1.6e-24	0.439876	0.321	0.112	3.69e-20	In-5	Car8
273	9.82e-25	0.437866	0.775	0.488	2.27e-20	In-5	Bcl11a
274	0.000227077	0.433131	0.513	0.457	1	In-5	Patj
275	6.67e-37	0.429008	1	0.968	1.54e-32	In-5	Adgrb3
276	2.35e-21	0.422987	0.978	0.85	5.43e-17	In-5	Dgkb
277	2.83e-08	0.420562	0.568	0.459	0.000652854	In-5	Foxp1
278	2.82e-32	0.417397	0.985	0.978	6.51e-28	In-5	Sntg1
279	1.45e-38	0.41489	0.985	0.972	3.34e-34	In-5	Pde4d
280	3.27e-23	0.414396	0.871	0.707	7.55e-19	In-5	Fhod3
281	5.26e-16	0.411982	0.948	0.882	1.21e-11	In-5	Pde4b
282	1.77e-25	0.403937	0.753	0.464	4.08e-21	In-5	Trpc5
283	7.13e-26	0.403754	0.856	0.604	1.65e-21	In-5	Galnt18
284	4.1e-07	0.400994	0.635	0.615	0.00945268	In-5	Rasgef1b
285	8.04e-18	0.399369	0.856	0.652	1.86e-13	In-5	Kcnmb2
286	4.95e-09	0.399222	0.402	0.276	0.000114273	In-5	Kcnh5
287	5.45e-18	0.392594	0.417	0.204	1.26e-13	In-5	Mei4
288	0.00142873	0.392449	0.391	0.335	1	In-5	Pcp4
289	6.5e-19	0.392297	0.679	0.439	1.5e-14	In-5	Galnt14
290	6.82e-08	0.390216	0.723	0.634	0.00157315	In-5	Cdh8
291	1.89e-17	0.386168	0.627	0.414	4.36e-13	In-5	L3mbtl3
292	4.68e-18	0.385532	0.937	0.856	1.08e-13	In-5	Unc5c
293	2.57e-23	0.381301	0.539	0.283	5.92e-19	In-5	Emx2os
294	6.78e-16	0.3813	0.443	0.242	1.57e-11	In-5	Cnr1
295	1.87e-13	0.378801	0.428	0.252	4.32e-09	In-5	Glp2r
296	3.57e-21	0.378768	0.93	0.806	8.25e-17	In-5	Arid1b
297	2.49e-33	0.377354	0.292	0.078	5.74e-29	In-5	Egfl6
298	6.63e-49	0.3708	0.199	0.025	1.53e-44	In-5	Bmpr1b
299	1.81e-19	0.370575	0.76	0.56	4.17e-15	In-5	Fam19a5
300	9.36e-18	0.369239	0.827	0.689	2.16e-13	In-5	Fut9
301	5.92e-22	0.368987	1	0.999	1.37e-17	In-5	Dlg2
302	6.8e-25	0.368226	0.76	0.406	1.57e-20	In-5	Zfp536
303	3.85e-13	0.366481	0.908	0.762	8.88e-09	In-5	Gabrg3
304	2.13e-21	0.364327	0.373	0.159	4.9e-17	In-5	Adra1a
305	1.03e-15	0.36428	0.915	0.776	2.37e-11	In-5	Kcnc2
306	1.89e-16	0.363495	0.801	0.596	4.36e-12	In-5	Trps1
307	3.5e-22	0.362462	0.996	0.988	8.09e-18	In-5	Ptprd
308	2.76e-16	0.360904	0.76	0.525	6.37e-12	In-5	Hs6st3
309	1.35e-08	0.36028	0.469	0.333	0.000311925	In-5	Bmper
310	8.59e-12	0.360132	0.797	0.669	1.98e-07	In-5	Gabra2
311	1.98e-12	0.358165	0.616	0.439	4.57e-08	In-5	Gm13256
312	4e-24	0.357857	0.292	0.094	9.23e-20	In-5	Pou6f2
313	4.44e-09	0.357269	0.804	0.832	0.000102502	In-5	Inpp4b
314	1.1e-14	0.351403	0.989	0.979	2.55e-10	In-5	Dpp6
315	2.26e-17	0.344734	0.494	0.253	5.22e-13	In-5	Dscaml1
316	7.29e-13	0.344645	0.941	0.792	1.68e-08	In-5	Mgat4c
317	3.11e-16	0.339022	0.269	0.11	7.17e-12	In-5	Pdgfc
318	2.91e-16	0.337497	0.97	0.844	6.72e-12	In-5	Ptprg
319	1.94e-10	0.337052	0.782	0.615	4.47e-06	In-5	Plxna4
320	1.86e-19	0.333103	0.982	0.935	4.29e-15	In-5	Rab3c
321	2.24e-22	0.331411	0.435	0.197	5.18e-18	In-5	Tmem132e
322	6.48e-17	0.324767	0.782	0.547	1.5e-12	In-5	Samd5
323	4.34e-14	0.320243	0.771	0.545	1e-09	In-5	Rtl4
324	5.18e-20	0.319481	0.956	0.826	1.2e-15	In-5	Dgki
325	5.32e-06	0.314367	0.579	0.475	0.122691	In-5	Scg2
326	9.16e-17	0.314114	0.852	0.701	2.11e-12	In-5	Cacna1e
327	6.73e-15	0.312483	0.347	0.17	1.55e-10	In-5	Gm45341
328	7.18e-13	0.312168	0.982	0.917	1.66e-08	In-5	Gabrb1
329	2.49e-09	0.310845	0.646	0.498	5.74e-05	In-5	Kcnk2
330	3.22e-23	0.310709	1	0.997	7.44e-19	In-5	Cntnap2
331	1.54e-11	0.310383	0.62	0.453	3.55e-07	In-5	Gm45881
332	8.23e-40	0.309033	1	1	1.9e-35	In-5	Meg3
333	1.51e-09	0.30707	0.487	0.359	3.48e-05	In-5	Gata3
334	0.00103713	0.306062	0.428	0.347	1	In-5	Ptprk
335	1.35e-06	0.304472	0.819	0.873	0.0310875	In-5	Dpp10
336	1.28e-17	0.301183	1	0.975	2.95e-13	In-5	Lrp1b
337	5.63e-09	0.300026	0.579	0.437	0.000129837	In-5	Alk
338	3.57e-15	0.298285	0.24	0.091	8.24e-11	In-5	Angpt1
339	3.11e-11	0.296429	0.273	0.133	7.19e-07	In-5	Lypd1
340	4.15e-17	0.294671	0.878	0.782	9.58e-13	In-5	Cacna2d2
341	5.61e-44	0.290342	0.14	0.012	1.29e-39	In-5	C1ql1
342	3.31e-14	0.289731	0.882	0.754	7.63e-10	In-5	Dner
343	2.29e-09	0.288194	0.384	0.229	5.28e-05	In-5	Pde1a
344	2.47e-15	0.287948	0.347	0.166	5.71e-11	In-5	Tpd52l1
345	4.35e-10	0.287331	0.875	0.745	1e-05	In-5	Runx1t1
346	2.81e-12	0.286774	0.893	0.709	6.49e-08	In-5	A230006K03Rik
347	2.8e-09	0.282827	0.48	0.333	6.46e-05	In-5	Bicc1
348	8.77e-13	0.282025	0.982	0.966	2.02e-08	In-5	Sgcz
349	2.83e-11	0.281907	0.952	0.79	6.53e-07	In-5	Grm8
350	3.79e-09	0.276343	0.69	0.585	8.74e-05	In-5	A830018L16Rik
351	1.06e-09	0.275176	0.771	0.632	2.44e-05	In-5	Alcam
352	5.44e-16	0.273586	0.506	0.274	1.26e-11	In-5	Pax7
353	3.08e-09	0.270796	0.871	0.848	7.1e-05	In-5	2021-03-01
354	5.24e-29	0.270667	0.247	0.062	1.21e-24	In-5	Itga6
355	2.34e-23	0.270338	0.148	0.029	5.39e-19	In-5	Ror2
356	3.79e-12	0.269834	0.867	0.657	8.75e-08	In-5	Robo1
357	2.16e-11	0.268175	0.69	0.536	4.99e-07	In-5	9330182L06Rik
358	2.65e-10	0.268158	0.443	0.283	6.12e-06	In-5	Baiap2
359	3.84e-08	0.266271	0.358	0.222	0.00088574	In-5	AC129186.1
360	7.91e-13	0.264117	0.919	0.861	1.83e-08	In-5	Cdk14
361	1.64e-09	0.263946	0.531	0.386	3.77e-05	In-5	Cplx2
362	3.56e-33	0.263443	0.188	0.033	8.22e-29	In-5	Calb1
363	9.96e-28	0.263351	0.9	0.586	2.3e-23	In-5	Kcnd3
364	0.00222934	0.261987	0.59	0.52	1	In-5	Gm28928
365	1.22e-07	0.261278	0.273	0.162	0.00282357	In-5	Gas7
366	6.38e-07	0.259962	0.472	0.353	0.014724	In-5	Gprin3
367	8.81e-11	0.259351	0.948	0.899	2.03e-06	In-5	Rtn1
368	1.74e-13	0.258301	0.269	0.121	4.02e-09	In-5	Emx2
369	1.14e-09	0.256103	0.646	0.474	2.62e-05	In-5	Qk
370	1.2e-10	0.252723	0.579	0.423	2.76e-06	In-5	Akap7
371	1.26e-11	0.251236	0.428	0.256	2.9e-07	In-5	Pik3r1
372	2.11e-66	1.32845	0.577	0.296	4.87e-62	In-1	Gpc5
373	1.18e-155	1.02046	0.666	0.24	2.73e-151	In-1	Ptprk
374	3.92e-176	0.981996	0.878	0.448	9.04e-172	In-1	Nxph1
375	8.73e-141	0.980119	0.851	0.53	2.02e-136	In-1	Npas3
376	3.71e-62	0.725138	0.81	0.622	8.56e-58	In-1	Robo1
377	6.77e-138	0.689808	0.978	0.722	1.56e-133	In-1	Asic2
378	4.33e-121	0.681243	0.821	0.412	9.99e-117	In-1	C130073E24Rik
379	5.02e-107	0.673904	0.719	0.309	1.16e-102	In-1	4930555F03Rik
380	2.11e-119	0.630231	0.966	0.655	4.87e-115	In-1	Pcdh15
381	8.85e-95	0.62198	0.625	0.251	2.04e-90	In-1	Tmem132d
382	5.74e-109	0.603747	0.669	0.257	1.33e-104	In-1	Tmem132c
383	1.15e-101	0.534992	0.585	0.214	2.66e-97	In-1	Tmtc2
384	6.96e-35	0.532754	0.68	0.484	1.61e-30	In-1	Cntn3
385	2.45e-49	0.529112	0.654	0.39	5.66e-45	In-1	Fam19a1
386	2.28e-93	0.52096	0.764	0.399	5.26e-89	In-1	D430041D05Rik
387	1.01e-104	0.518759	0.588	0.203	2.34e-100	In-1	Vwc2l
388	1.34e-98	0.511738	0.836	0.42	3.1e-94	In-1	Gm15398
389	5.03e-77	0.505161	0.361	0.101	1.16e-72	In-1	Slit3
390	2.6e-77	0.503105	0.732	0.404	6e-73	In-1	Fstl5
391	4.14e-74	0.502319	0.988	0.881	9.55e-70	In-1	Cdh18
392	2.04e-84	0.498343	0.798	0.444	4.71e-80	In-1	Htr2c
393	8.78e-79	0.472035	0.545	0.219	2.03e-74	In-1	Gm45321
394	4.42e-85	0.46332	0.696	0.336	1.02e-80	In-1	Pcdh17
395	1.16e-52	0.456135	0.419	0.178	2.67e-48	In-1	Cntnap5c
396	1.92e-76	0.452312	0.632	0.301	4.42e-72	In-1	Cdh22
397	4.39e-76	0.451108	0.579	0.242	1.01e-71	In-1	Gm2516
398	8.64e-77	0.449426	0.915	0.582	1.99e-72	In-1	Rmst
399	9.51e-79	0.448718	0.505	0.194	2.19e-74	In-1	Sdk2
400	2.05e-93	0.441541	0.587	0.227	4.74e-89	In-1	Cobl
401	1.12e-66	0.433877	0.819	0.483	2.58e-62	In-1	Pdzrn4
402	2.37e-36	0.429789	0.577	0.353	5.46e-32	In-1	Kcnq5
403	7.68e-87	0.426183	0.655	0.26	1.77e-82	In-1	Tfap2b
404	4.62e-72	0.426028	0.86	0.544	1.07e-67	In-1	Plxna4
405	2.03e-64	0.425352	0.865	0.615	4.68e-60	In-1	Cdh10
406	8.52e-81	0.424537	0.593	0.254	1.97e-76	In-1	Slit1
407	2.37e-29	0.4188	0.731	0.566	5.48e-25	In-1	Ntng1
408	6.66e-41	0.416207	0.351	0.151	1.54e-36	In-1	Cadps2
409	4.14e-68	0.414822	0.596	0.273	9.56e-64	In-1	Vat1l
410	7.67e-46	0.404859	0.798	0.549	1.77e-41	In-1	Cdh13
411	6.94e-68	0.402547	0.504	0.205	1.6e-63	In-1	Gm45323
412	2.15e-72	0.397189	0.602	0.271	4.96e-68	In-1	Gm11418
413	5.02e-43	0.389393	0.945	0.887	1.16e-38	In-1	Ralyl
414	9.31e-41	0.384293	0.955	0.812	2.15e-36	In-1	2021-03-01
415	6.69e-62	0.374704	0.965	0.721	1.54e-57	In-1	Kirrel3
416	3.13e-61	0.365192	0.482	0.2	7.23e-57	In-1	Grik3
417	4.03e-51	0.363225	0.812	0.537	9.3e-47	In-1	Elavl2
418	5.85e-70	0.362389	0.589	0.267	1.35e-65	In-1	Sgpp2
419	1.26e-60	0.361103	0.737	0.424	2.92e-56	In-1	Arhgap18
420	2.36e-67	0.35919	0.995	0.965	5.44e-63	In-1	Nlgn1
421	6.05e-58	0.343701	0.401	0.147	1.4e-53	In-1	Tmem132cos
422	2.45e-89	0.343546	0.996	0.975	5.64e-85	In-1	Frmd4a
423	3.65e-49	0.339045	0.458	0.21	8.41e-45	In-1	Crim1
424	9.49e-20	0.337539	0.652	0.502	2.19e-15	In-1	Hs6st3
425	2.13e-20	0.336358	0.797	0.646	4.91e-16	In-1	Ephb1
426	4.35e-54	0.331567	0.59	0.3	1e-49	In-1	Olfm2
427	6.56e-67	0.330369	0.14	0.009	1.51e-62	In-1	Rxfp2
428	8.87e-26	0.329152	0.537	0.337	2.05e-21	In-1	Nckap5
429	1.09e-60	0.328635	0.354	0.116	2.51e-56	In-1	L3mbtl4
430	3.14e-30	0.325824	0.408	0.224	7.25e-26	In-1	Pde1c
431	1.81e-57	0.318885	0.998	0.97	4.17e-53	In-1	Grid2
432	8.05e-45	0.316421	0.808	0.522	1.86e-40	In-1	Scn9a
433	9.84e-58	0.310078	0.356	0.12	2.27e-53	In-1	Gm45341
434	1.95e-47	0.309233	0.98	0.866	4.49e-43	In-1	Nav3
435	4.05e-96	0.30908	0.249	0.029	9.35e-92	In-1	Lncenc1
436	6.5e-44	0.307974	0.687	0.415	1.5e-39	In-1	Zfp618
437	2.18e-55	0.303766	0.666	0.353	5.04e-51	In-1	Kif26b
438	9.16e-43	0.302582	0.516	0.265	2.11e-38	In-1	B230217J21Rik
439	4.39e-41	0.300864	0.63	0.371	1.01e-36	In-1	Gabra1
440	3.77e-37	0.300833	0.67	0.424	8.7e-33	In-1	Mctp1
441	1.28e-46	0.299207	0.659	0.376	2.96e-42	In-1	Slc9a9
442	5.01e-36	0.294516	0.708	0.458	1.16e-31	In-1	Adcy2
443	8.74e-34	0.294141	0.772	0.543	2.02e-29	In-1	9530059O14Rik
444	2.41e-39	0.292345	0.495	0.26	5.56e-35	In-1	Stard5
445	1.42e-53	0.288323	0.406	0.157	3.27e-49	In-1	Adamts16
446	2.13e-46	0.28497	0.958	0.827	4.9e-42	In-1	Sybu
447	8.84e-67	0.28435	0.255	0.054	2.04e-62	In-1	Syt17
448	6.37e-27	0.282755	0.871	0.703	1.47e-22	In-1	Kcnh7
449	1.18e-24	0.282707	0.138	0.043	2.73e-20	In-1	Cdh23
450	8.89e-16	0.279681	0.335	0.206	2.05e-11	In-1	Pde1a
451	1.15e-42	0.279145	0.402	0.181	2.65e-38	In-1	Ptpre
452	3.51e-23	0.274094	0.27	0.132	8.11e-19	In-1	Dpyd
453	1.93e-19	0.27296	0.176	0.076	4.45e-15	In-1	Angpt1
454	4.03e-43	0.272618	0.524	0.269	9.31e-39	In-1	Htr1f
455	5.08e-35	0.268106	0.723	0.459	1.17e-30	In-1	D030068K23Rik
456	2.04e-86	0.266017	0.178	0.01	4.71e-82	In-1	Npas1
457	4.59e-41	0.265995	0.928	0.74	1.06e-36	In-1	Slc24a2
458	9.64e-65	0.265668	0.236	0.047	2.23e-60	In-1	Pde11a
459	2.83e-32	0.265082	0.752	0.516	6.52e-28	In-1	Palm2
460	2.24e-36	0.264517	0.976	0.805	5.18e-32	In-1	Ctnna3
461	7.91e-58	0.263525	0.183	0.03	1.83e-53	In-1	Otof
462	6.37e-37	0.262083	0.907	0.748	1.47e-32	In-1	Atp8a2
463	4.02e-30	0.261995	0.676	0.452	9.29e-26	In-1	Myo16
464	6.37e-34	0.261568	0.882	0.694	1.47e-29	In-1	Aff3
465	3.01e-28	0.261503	0.584	0.38	6.95e-24	In-1	Catspere2
466	2.03e-36	0.261216	0.892	0.641	4.69e-32	In-1	Rit2
467	3.02e-61	0.258497	0.999	0.984	6.98e-57	In-1	Ank2
468	4.86e-45	0.257261	0.356	0.141	1.12e-40	In-1	Wwc1
469	3.45e-28	0.2568	0.625	0.414	7.96e-24	In-1	Srgap1
470	1.31e-32	0.256479	0.595	0.371	3.02e-28	In-1	Rap1gap2
471	4.58e-32	0.253924	0.917	0.721	1.06e-27	In-1	Gabrg3
472	5.5e-33	0.25019	0.829	0.626	1.27e-28	In-1	Nova1
473	0	2.13786	0.968	0.089	0	In-3	Nfib
474	4.28e-125	1.3113	0.812	0.334	9.88e-121	In-3	Hs3st4
475	4.58e-142	1.30233	0.921	0.563	1.06e-137	In-3	Kcnd3
476	1.95e-161	1.26131	0.936	0.419	4.49e-157	In-3	Sorcs3
477	4.89e-167	1.14524	0.987	0.637	1.13e-162	In-3	Chrm3
478	5.69e-146	1.07781	0.925	0.492	1.31e-141	In-3	Trhde
479	1.85e-144	1.07588	0.962	0.559	4.27e-140	In-3	Sorcs1
480	2.07e-135	1.01243	0.896	0.414	4.78e-131	In-3	Cacna2d3
481	3.19e-165	0.942899	0.77	0.197	7.37e-161	In-3	Dscaml1
482	9.73e-146	0.930013	0.896	0.364	2.25e-141	In-3	Zfp536
483	2.82e-97	0.903835	0.763	0.349	6.51e-93	In-3	Sphkap
484	2e-189	0.895921	0.397	0.025	4.62e-185	In-3	Ror1
485	3.13e-38	0.871795	0.593	0.351	7.22e-34	In-3	Gm20754
486	5.96e-126	0.871617	0.998	0.942	1.38e-121	In-3	Nrg1
487	1.7e-75	0.864254	0.339	0.073	3.93e-71	In-3	Sst
488	6.22e-92	0.833401	0.983	0.621	1.43e-87	In-3	Otx2os1
489	4e-59	0.797044	0.921	0.802	9.24e-55	In-3	Kctd16
490	1.56e-89	0.770997	0.923	0.636	3.59e-85	In-3	Arpp21
491	1.49e-83	0.757958	0.821	0.507	3.43e-79	In-3	Msra
492	1.16e-75	0.757562	0.998	0.892	2.69e-71	In-3	Lrrtm4
493	5.88e-60	0.756703	0.806	0.463	1.36e-55	In-3	Il1rapl2
494	4.73e-54	0.721799	0.891	0.714	1.09e-49	In-3	Thsd7b
495	1.32e-74	0.716904	0.94	0.643	3.04e-70	In-3	Egfem1
496	1.61e-71	0.714107	0.802	0.473	3.71e-67	In-3	Mcc
497	7.05e-56	0.705447	0.957	0.847	1.63e-51	In-3	Cntn4
498	8.28e-187	0.693936	0.439	0.036	1.91e-182	In-3	St18
499	3.35e-53	0.663403	0.401	0.144	7.73e-49	In-3	Satb1
500	4.51e-61	0.659367	0.887	0.712	1.04e-56	In-3	Thrb
501	1.07e-66	0.652641	0.65	0.305	2.47e-62	In-3	Tcf4
502	1.46e-84	0.648289	0.768	0.291	3.38e-80	In-3	Meis2
503	3.67e-35	0.642943	0.465	0.223	8.47e-31	In-3	Pde3a
504	1.99e-129	0.6428	0.256	0.013	4.58e-125	In-3	Dcn
505	3.51e-39	0.642263	0.623	0.375	8.1e-35	In-3	Dock10
506	4.31e-67	0.641644	0.814	0.443	9.94e-63	In-3	Zeb2
507	4.54e-110	0.640195	0.409	0.068	1.05e-105	In-3	Gm26688
508	4.75e-36	0.639957	0.763	0.576	1.1e-31	In-3	Slc35f4
509	1.32e-59	0.633666	0.932	0.742	3.05e-55	In-3	Kcnip1
510	1e-60	0.627677	0.648	0.309	2.32e-56	In-3	Dpf3
511	4.52e-61	0.614031	0.977	0.885	1.04e-56	In-3	Kcnb2
512	1.51e-172	0.612019	0.409	0.034	3.48e-168	In-3	Nfix
513	3.38e-148	0.607112	0.247	0.006	7.81e-144	In-3	Qrfpr
514	3.43e-84	0.604123	0.309	0.051	7.92e-80	In-3	Cubn
515	7.19e-65	0.602387	0.945	0.746	1.66e-60	In-3	Tshz2
516	1.91e-43	0.597749	0.842	0.654	4.42e-39	In-3	Pdzd2
517	3.45e-48	0.593716	0.836	0.591	7.95e-44	In-3	Gm26883
518	5.1e-84	0.593002	0.998	0.957	1.18e-79	In-3	Opcml
519	4.27e-69	0.585199	0.627	0.275	9.85e-65	In-3	Gm3764
520	9.3e-69	0.574856	0.388	0.105	2.15e-64	In-3	Pparg
521	9.78e-34	0.572676	0.795	0.634	2.26e-29	In-3	Pid1
522	5.76e-74	0.570879	0.998	0.964	1.33e-69	In-3	Dlgap1
523	1.69e-59	0.566038	0.989	0.861	3.89e-55	In-3	Cntn5
524	1.54e-76	0.561541	0.362	0.081	3.54e-72	In-3	Arhgap15
525	1.92e-32	0.558199	0.412	0.192	4.43e-28	In-3	4930509J09Rik
526	8.99e-45	0.546857	0.65	0.399	2.07e-40	In-3	2900055J20Rik
527	4.28e-14	0.543805	0.471	0.356	9.87e-10	In-3	Arhgap6
528	6.13e-18	0.533754	0.39	0.234	1.41e-13	In-3	Slc15a2
529	1.05e-64	0.529755	0.981	0.911	2.42e-60	In-3	Pbx1
530	1.77e-44	0.526654	0.962	0.764	4.08e-40	In-3	Asic2
531	9.22e-21	0.524238	0.335	0.173	2.13e-16	In-3	Nfia
532	2.19e-19	0.523802	0.719	0.575	5.05e-15	In-3	Plcxd3
533	3.61e-09	0.517494	0.446	0.361	8.33e-05	In-3	Mir670hg
534	5.76e-44	0.507035	0.593	0.312	1.33e-39	In-3	Chrna7
535	5.23e-34	0.506274	0.567	0.336	1.21e-29	In-3	Trpc3
536	8.36e-43	0.483099	0.559	0.277	1.93e-38	In-3	Ghr
537	5.4e-19	0.482176	0.623	0.465	1.25e-14	In-3	Fgf13
538	3.5e-33	0.47861	0.657	0.428	8.08e-29	In-3	Tox3
539	3.77e-38	0.475421	0.271	0.083	8.69e-34	In-3	Stk33
540	2.22e-45	0.472835	0.938	0.868	5.11e-41	In-3	Setbp1
541	4.77e-35	0.470455	0.881	0.736	1.1e-30	In-3	Runx1t1
542	2.83e-33	0.463398	0.936	0.762	6.53e-29	In-3	Unc5d
543	9.31e-42	0.456413	0.548	0.273	2.15e-37	In-3	Tcerg1l
544	1.62e-42	0.4542	0.878	0.63	3.73e-38	In-3	Cdh4
545	3.55e-14	0.451417	0.65	0.533	8.18e-10	In-3	Itpr1
546	4.84e-27	0.440443	0.559	0.36	1.12e-22	In-3	Pcdh19
547	4.09e-45	0.438552	0.305	0.089	9.44e-41	In-3	Fgf10
548	1.75e-10	0.435528	0.627	0.51	4.03e-06	In-3	Gm28928
549	2.77e-34	0.432032	0.222	0.062	6.39e-30	In-3	Ltbp1
550	5.73e-31	0.431665	0.714	0.512	1.32e-26	In-3	Gtdc1
551	1.96e-32	0.430253	0.898	0.719	4.52e-28	In-3	Epha5
552	2.24e-45	0.427971	0.348	0.111	5.17e-41	In-3	Gfra1
553	7.4e-23	0.416492	0.665	0.519	1.71e-18	In-3	Gpm6b
554	1.2e-27	0.416058	0.902	0.765	2.78e-23	In-3	Cntn6
555	1.61e-50	0.405195	0.998	0.953	3.71e-46	In-3	Dab1
556	2.74e-37	0.404597	0.925	0.85	6.33e-33	In-3	Kalrn
557	3.1e-14	0.398388	0.591	0.467	7.16e-10	In-3	Scg2
558	1.42e-23	0.397115	0.473	0.276	3.27e-19	In-3	Tbc1d1
559	4.2e-47	0.396266	0.247	0.057	9.69e-43	In-3	Pappa
560	7.77e-27	0.393224	0.597	0.36	1.79e-22	In-3	Nckap5
561	3.19e-13	0.392053	0.695	0.581	7.37e-09	In-3	Zfp804b
562	3.23e-43	0.38105	0.991	0.964	7.46e-39	In-3	Astn2
563	9.4e-13	0.377711	0.241	0.129	2.17e-08	In-3	Trpc4
564	7.7e-20	0.377455	0.546	0.398	1.78e-15	In-3	Gas6
565	1.01e-98	0.375971	0.235	0.018	2.34e-94	In-3	Gm13601
566	6.32e-16	0.374436	0.535	0.403	1.46e-11	In-3	St6galnac3
567	2.89e-83	0.373229	0.128	0.002	6.68e-79	In-3	Epyc
568	4.54e-17	0.372667	0.341	0.19	1.05e-12	In-3	Vgf
569	1.15e-27	0.371525	0.369	0.168	2.66e-23	In-3	Gm4876
570	3.39e-106	0.368134	0.241	0.017	7.82e-102	In-3	C230057M02Rik
571	1.05e-33	0.365344	0.277	0.092	2.43e-29	In-3	Hs3st3a1
572	2.79e-20	0.361976	0.416	0.252	6.45e-16	In-3	Fam78b
573	7.35e-19	0.359125	0.65	0.521	1.7e-14	In-3	Frmpd3
574	4.32e-20	0.357592	0.296	0.141	9.97e-16	In-3	Lmo3
575	3.1e-29	0.355463	0.97	0.928	7.15e-25	In-3	Cacnb2
576	9.51e-09	0.355378	0.65	0.6	0.000219493	In-3	Mef2c
577	1.69e-107	0.354351	0.237	0.015	3.9e-103	In-3	Xirp2
578	4.6e-29	0.351613	0.49	0.265	1.06e-24	In-3	Lgi1
579	8.39e-24	0.350503	0.725	0.541	1.94e-19	In-3	Plppr1
580	9.29e-25	0.349993	0.644	0.416	2.14e-20	In-3	Kcnab1
581	3.45e-22	0.346575	0.893	0.808	7.95e-18	In-3	Apba1
582	3.87e-20	0.344909	0.716	0.58	8.92e-16	In-3	Rsrc1
583	2.18e-28	0.340625	0.386	0.172	5.02e-24	In-3	Bcl11b
584	0.000668627	0.340117	0.452	0.429	1	In-3	Thsd4
585	6.88e-32	0.33615	0.279	0.099	1.59e-27	In-3	4930473D10Rik
586	4.88e-19	0.335994	0.772	0.677	1.13e-14	In-3	Pak7
587	1.47e-12	0.335425	0.279	0.163	3.4e-08	In-3	Ccdc171
588	2.34e-13	0.335319	0.384	0.244	5.41e-09	In-3	Man1a
589	2.99e-31	0.335295	0.271	0.094	6.9e-27	In-3	Htr2a
590	2.41e-21	0.335209	0.836	0.734	5.56e-17	In-3	Tcf12
591	2.66e-33	0.334696	0.981	0.914	6.14e-29	In-3	Gabrb1
592	9.69e-15	0.334126	0.365	0.22	2.24e-10	In-3	Cdh20
593	1.94e-21	0.333734	0.795	0.659	4.47e-17	In-3	Bach2
594	1.7e-26	0.332819	0.942	0.845	3.91e-22	In-3	Ntrk3
595	1.91e-24	0.330691	0.371	0.186	4.41e-20	In-3	Map3k5
596	1.83e-23	0.329362	0.955	0.848	4.22e-19	In-3	Luzp2
597	9.78e-22	0.325207	0.561	0.361	2.26e-17	In-3	Tead1
598	1.37e-20	0.323798	0.802	0.672	3.16e-16	In-3	C130071C03Rik
599	2.8e-30	0.322015	0.78	0.505	6.45e-26	In-3	Sdk1
600	7.61e-82	0.320635	0.175	0.01	1.76e-77	In-3	Ntf3
601	1.39e-12	0.320236	0.217	0.112	3.21e-08	In-3	Grb14
602	1.33e-28	0.318137	0.175	0.046	3.06e-24	In-3	Adamtsl3
603	1.41e-17	0.318099	0.443	0.278	3.25e-13	In-3	Rerg
604	1.27e-31	0.317639	0.868	0.64	2.94e-27	In-3	Nell1
605	9.71e-25	0.317142	0.878	0.784	2.24e-20	In-3	Nedd4l
606	6.14e-18	0.316989	0.463	0.299	1.42e-13	In-3	Peli2
607	4.12e-08	0.316264	0.582	0.522	0.000950868	In-3	Lcorl
608	1.45e-24	0.316181	0.175	0.051	3.34e-20	In-3	Tcf7l2
609	1.9e-24	0.312877	0.584	0.333	4.38e-20	In-3	Tfap2b
610	1.92e-05	0.312527	0.307	0.231	0.442247	In-3	Pde1a
611	3.78e-25	0.306395	0.684	0.437	8.72e-21	In-3	Slc44a5
612	4.51e-19	0.305026	0.499	0.337	1.04e-14	In-3	Adcy1
613	2.94e-20	0.304552	0.467	0.272	6.78e-16	In-3	Wls
614	3.47e-33	0.30287	0.2	0.052	8.01e-29	In-3	St3gal1
615	2.97e-14	0.300421	0.55	0.413	6.86e-10	In-3	Sidt1
616	2.75e-20	0.297567	0.441	0.255	6.34e-16	In-3	Rftn1
617	9.49e-16	0.295917	0.872	0.829	2.19e-11	In-3	Zbtb20
618	3.53e-18	0.29424	0.554	0.356	8.15e-14	In-3	Otx2
619	1.61e-15	0.292988	0.804	0.693	3.71e-11	In-3	Rit2
620	1.28e-16	0.292222	0.299	0.157	2.95e-12	In-3	Adra1a
621	2.22e-12	0.291925	0.646	0.553	5.13e-08	In-3	Pou2f1
622	4.46e-41	0.291018	0.132	0.017	1.03e-36	In-3	E130114P18Rik
623	4.96e-15	0.290539	0.62	0.497	1.14e-10	In-3	Chl1
624	9.3e-12	0.288721	0.405	0.28	2.14e-07	In-3	Gm48321
625	4.03e-27	0.287951	0.998	0.969	9.31e-23	In-3	Nlgn1
626	1.85e-12	0.287924	0.554	0.415	4.27e-08	In-3	Pde7b
627	8.97e-25	0.287491	0.26	0.1	2.07e-20	In-3	Cald1
628	2.44e-19	0.286934	0.458	0.266	5.63e-15	In-3	Pax7
629	3.05e-20	0.285716	0.902	0.815	7.04e-16	In-3	Plekha5
630	4.41e-11	0.283934	0.695	0.63	1.02e-06	In-3	Rfx3
631	3.22e-44	0.283142	0.198	0.038	7.43e-40	In-3	Tns3
632	8.15e-25	0.282394	0.241	0.089	1.88e-20	In-3	Gm48003
633	3.31e-11	0.281016	0.418	0.292	7.64e-07	In-3	Lmo1
634	0.000578402	0.27864	0.883	0.911	1	In-3	Pde10a
635	6.04e-19	0.277053	0.237	0.101	1.39e-14	In-3	Rai14
636	2.8e-20	0.276412	0.126	0.033	6.45e-16	In-3	Abi3bp
637	1.18e-14	0.275986	0.623	0.496	2.72e-10	In-3	Fam13c
638	8.94e-21	0.274308	0.249	0.103	2.06e-16	In-3	Ccnd2
639	8.33e-17	0.272833	0.836	0.762	1.92e-12	In-3	Atp8a1
640	6.74e-10	0.27219	0.486	0.383	1.56e-05	In-3	Syt4
641	7.76e-14	0.270997	0.486	0.34	1.79e-09	In-3	Gm11418
642	4.8e-12	0.270838	0.744	0.66	1.11e-07	In-3	Camk2a
643	1.94e-13	0.269559	0.902	0.836	4.48e-09	In-3	Sorbs2
644	5.41e-12	0.269001	0.693	0.586	1.25e-07	In-3	5730522E02Rik
645	3.58e-68	0.267537	0.147	0.009	8.27e-64	In-3	Met
646	9.15e-07	0.266599	0.505	0.437	0.0211195	In-3	Mkx
647	1.7e-10	0.265005	0.262	0.159	3.92e-06	In-3	B3gat2
648	2.45e-15	0.261893	0.269	0.14	5.66e-11	In-3	Gm10848
649	4.78e-12	0.2618	0.49	0.381	1.1e-07	In-3	Terf1
650	1.04e-17	0.260245	0.26	0.123	2.41e-13	In-3	Prag1
651	2.03e-08	0.259691	0.301	0.207	0.000467992	In-3	Kcnh1
652	5.93e-07	0.259248	0.328	0.239	0.0136733	In-3	Ankfn1
653	4.42e-18	0.257173	0.9	0.81	1.02e-13	In-3	Slc35f1
654	1.08e-25	0.255902	0.996	0.992	2.49e-21	In-3	Ccser1
655	1.55e-14	0.255848	0.499	0.341	3.57e-10	In-3	Dgkg
656	2.09e-05	0.254845	0.452	0.382	0.482068	In-3	Chsy3
657	1.32e-10	0.252908	0.392	0.272	3.05e-06	In-3	Myo1b
658	2.15e-11	0.252307	0.292	0.179	4.97e-07	In-3	Rin2
659	3.24e-05	0.252203	0.817	0.91	0.747038	In-3	Tenm4
660	2.25e-12	0.250062	0.704	0.57	5.2e-08	In-3	Clvs1
661	2.44e-90	0.903353	0.708	0.283	5.63e-86	In-4	Gm32647
662	5.59e-89	0.76401	0.951	0.557	1.29e-84	In-4	Adarb2
663	6.72e-59	0.618925	0.954	0.777	1.55e-54	In-4	Mgat4c
664	1.98e-49	0.574666	0.454	0.167	4.57e-45	In-4	Gm38505
665	3.66e-64	0.514194	0.954	0.686	8.45e-60	In-4	Car10
666	1.81e-39	0.49182	0.803	0.522	4.18e-35	In-4	Clstn2
667	1.59e-35	0.471128	0.474	0.219	3.67e-31	In-4	Col11a1
668	8.35e-24	0.467435	0.761	0.614	1.93e-19	In-4	Zfp804a
669	9.37e-21	0.457157	0.653	0.454	2.16e-16	In-4	Pex5l
670	7.13e-48	0.450508	0.989	0.718	1.64e-43	In-4	Zfhx3
671	3.78e-37	0.444596	0.48	0.22	8.71e-33	In-4	Cdh9
672	5.82e-29	0.436133	0.937	0.751	1.34e-24	In-4	Dcc
673	8.12e-40	0.423836	0.691	0.397	1.87e-35	In-4	Gabra1
674	1.16e-46	0.422101	0.935	0.628	2.68e-42	In-4	Robo1
675	2.49e-13	0.419582	0.687	0.518	5.74e-09	In-4	Hs6st3
676	1.67e-39	0.414814	0.882	0.65	3.84e-35	In-4	Gabrb2
677	4.69e-50	0.414795	0.854	0.482	1.08e-45	In-4	Cntn3
678	2.22e-13	0.39969	0.719	0.586	5.11e-09	In-4	Ldb2
679	2.96e-26	0.395554	0.841	0.645	6.82e-22	In-4	Arpp21
680	6.48e-27	0.387946	0.793	0.559	1.5e-22	In-4	A830018L16Rik
681	2.01e-49	0.381599	0.313	0.087	4.64e-45	In-4	Fign
682	1.15e-116	0.375544	0.23	0.011	2.65e-112	In-4	Six3
683	6.17e-31	0.361398	0.742	0.473	1.42e-26	In-4	Galnt17
684	2.94e-27	0.360514	0.7	0.445	6.79e-23	In-4	Tox
685	5.98e-25	0.342228	0.345	0.163	1.38e-20	In-4	Sv2c
686	1.53e-25	0.335421	0.577	0.333	3.52e-21	In-4	Syt2
687	3.92e-23	0.333383	0.827	0.611	9.04e-19	In-4	Alcam
688	1.25e-21	0.331999	0.803	0.62	2.89e-17	In-4	Ncald
689	4.38e-22	0.320879	0.808	0.6	1.01e-17	In-4	Ptprm
690	6.05e-21	0.320816	0.328	0.161	1.4e-16	In-4	Col19a1
691	2.48e-33	0.317758	0.653	0.371	5.72e-29	In-4	Rhbdl3
692	1.15e-22	0.313396	0.894	0.729	2.65e-18	In-4	Tenm1
693	1.02e-39	0.311544	0.545	0.258	2.36e-35	In-4	Kiz
694	2.35e-30	0.31038	0.998	0.965	5.42e-26	In-4	Adgrb3
695	1.47e-30	0.309007	0.789	0.524	3.39e-26	In-4	Olfm3
696	2.23e-26	0.30555	0.816	0.568	5.15e-22	In-4	9530059O14Rik
697	8.03e-30	0.297558	0.326	0.13	1.85e-25	In-4	Lrmda
698	2.14e-21	0.292683	0.958	0.834	4.94e-17	In-4	Epha6
699	6.35e-33	0.290583	0.55	0.283	1.47e-28	In-4	Coro6
700	1.96e-34	0.289964	0.368	0.148	4.52e-30	In-4	Mapk4
701	2.06e-32	0.289153	0.491	0.242	4.76e-28	In-4	Aifm3
702	4.67e-44	0.285155	0.385	0.133	1.08e-39	In-4	Sez6
703	4.35e-25	0.276059	0.856	0.623	1e-20	In-4	Edil3
704	2.87e-27	0.2719	0.455	0.221	6.62e-23	In-4	Ndst4
705	4.66e-20	0.271651	0.706	0.478	1.08e-15	In-4	Ndst3
706	4.78e-20	0.269461	0.928	0.747	1.1e-15	In-4	Gabrg3
707	6.67e-17	0.253791	0.966	0.856	1.54e-12	In-4	Cntnap5a
708	4.86e-25	0.251426	0.86	0.588	1.12e-20	In-4	Plxna4
709	8.73e-269	2.28535	0.976	0.489	2.01e-264	In-10	Pcbp3
710	0	1.93404	0.872	0.119	0	In-10	Reln
711	4.07e-218	1.84162	0.994	0.87	9.4e-214	In-10	Trpm3
712	3.16e-172	1.80895	0.63	0.13	7.28e-168	In-10	Adamtsl1
713	5.87e-272	1.74862	0.97	0.261	1.35e-267	In-10	Meis2
714	1.7e-104	1.69675	0.891	0.727	3.92e-100	In-10	Tspan5
715	2.23e-227	1.55814	0.983	0.711	5.14e-223	In-10	Nyap2
716	6.45e-205	1.48055	0.983	0.6	1.49e-200	In-10	Unc13c
717	2.06e-212	1.44281	0.987	0.646	4.75e-208	In-10	Zmat4
718	1.51e-223	1.42379	0.97	0.533	3.49e-219	In-10	Nos1ap
719	9.82e-214	1.40915	0.987	0.701	2.27e-209	In-10	Tmem108
720	2.67e-159	1.29577	0.806	0.271	6.17e-155	In-10	Lhfp
721	0	1.2379	0.613	0.036	0	In-10	Gabrr2
722	4.71e-195	1.23499	0.989	0.691	1.09e-190	In-10	Adcy8
723	1.1e-103	1.21414	0.363	0.058	2.54e-99	In-10	Npsr1
724	5.68e-189	1.21035	0.491	0.051	1.31e-184	In-10	Hmcn1
725	5.2e-46	1.16256	0.568	0.319	1.2e-41	In-10	Col25a1
726	2.92e-39	1.15649	0.816	0.845	6.73e-35	In-10	Prkg1
727	3.25e-152	1.14509	0.983	0.928	7.49e-148	In-10	Frmd5
728	1.72e-122	1.11804	0.857	0.465	3.96e-118	In-10	Mcc
729	5.8e-188	1.09922	0.985	0.849	1.34e-183	In-10	Zeb1
730	1.05e-149	1.09611	0.994	0.636	2.41e-145	In-10	Egfem1
731	1.13e-248	1.09163	0.752	0.121	2.6e-244	In-10	Lypd6
732	5.65e-163	1.08481	0.88	0.391	1.3e-158	In-10	Gm21798
733	1.08e-131	1.08245	0.652	0.17	2.49e-127	In-10	AC129186.1
734	3.78e-129	1.0453	0.827	0.413	8.73e-125	In-10	Igsf3
735	1.59e-266	1.02856	0.699	0.084	3.67e-262	In-10	Gm27151
736	4.01e-128	1.02428	0.865	0.411	9.24e-124	In-10	Slc44a5
737	2.07e-136	1.01451	0.81	0.296	4.79e-132	In-10	Tmcc3
738	1.19e-138	0.994739	0.985	0.824	2.74e-134	In-10	Hdac9
739	1.64e-154	0.982277	0.998	0.935	3.78e-150	In-10	Auts2
740	2.13e-109	0.974461	0.934	0.64	4.91e-105	In-10	Pdzd2
741	2.19e-169	0.961114	0.801	0.224	5.06e-165	In-10	Nwd2
742	5.66e-124	0.96093	0.793	0.301	1.31e-119	In-10	Stac
743	1.73e-103	0.958314	0.808	0.39	3.99e-99	In-10	St6galnac5
744	1.28e-145	0.956185	0.955	0.608	2.96e-141	In-10	Dgkh
745	4.71e-118	0.943316	0.97	0.809	1.09e-113	In-10	Inpp4b
746	1.05e-102	0.934565	0.955	0.743	2.43e-98	In-10	Pcsk2
747	4.96e-12	0.918711	0.402	0.304	1.15e-07	In-10	Cdh6
748	3.03e-153	0.913983	0.972	0.798	6.98e-149	In-10	Srgap2
749	3.17e-78	0.91001	0.658	0.283	7.31e-74	In-10	Sox5
750	6.78e-95	0.908428	0.791	0.333	1.56e-90	In-10	Pard3b
751	4e-113	0.891634	0.848	0.467	9.24e-109	In-10	Cdkl5
752	3.78e-148	0.874106	0.795	0.247	8.73e-144	In-10	Parm1
753	2.87e-167	0.873263	0.991	0.962	6.63e-163	In-10	Snap25
754	1.17e-231	0.866047	0.609	0.067	2.71e-227	In-10	Ccdc141
755	3.07e-114	0.863112	0.985	0.891	7.09e-110	In-10	Ralyl
756	5.53e-111	0.854074	0.889	0.498	1.28e-106	In-10	Itpr1
757	1.3e-108	0.843822	0.889	0.519	3.01e-104	In-10	Rps6ka3
758	9.8e-137	0.833272	0.801	0.269	2.26e-132	In-10	Hs3st3b1
759	2.49e-90	0.827442	0.976	0.622	5.75e-86	In-10	Otx2os1
760	1.15e-96	0.82579	0.748	0.361	2.66e-92	In-10	Pik3cb
761	4.51e-119	0.820828	0.929	0.626	1.04e-114	In-10	Ttll5
762	5.23e-135	0.820289	0.989	0.964	1.21e-130	In-10	Negr1
763	3.36e-110	0.819897	0.652	0.221	7.76e-106	In-10	Diras2
764	2.48e-133	0.810724	0.989	0.934	5.72e-129	In-10	Fat3
765	9.03e-104	0.806812	0.868	0.545	2.08e-99	In-10	Adgrb1
766	2.26e-168	0.797813	1	0.998	5.21e-164	In-10	Magi2
767	1.11e-121	0.782837	0.735	0.253	2.56e-117	In-10	Lrrc1
768	3.71e-174	0.774006	0.703	0.153	8.55e-170	In-10	Ngef
769	8.04e-45	0.754774	0.803	0.657	1.85e-40	In-10	Ptprt
770	1.22e-114	0.743588	0.479	0.095	2.82e-110	In-10	Eepd1
771	1.45e-124	0.742165	0.66	0.17	3.34e-120	In-10	Igf1
772	3.08e-98	0.73279	0.895	0.598	7.1e-94	In-10	Rapgef5
773	7.52e-98	0.732568	0.853	0.437	1.74e-93	In-10	Ripor2
774	1.61e-122	0.730206	0.979	0.94	3.73e-118	In-10	Otud7a
775	2.27e-94	0.727987	0.88	0.549	5.23e-90	In-10	Slc6a6
776	4.97e-118	0.727847	0.979	0.903	1.15e-113	In-10	Ppfia2
777	2.53e-70	0.719386	0.84	0.517	5.83e-66	In-10	Pigk
778	3.46e-88	0.716081	0.974	0.908	7.97e-84	In-10	Phactr1
779	1.9e-105	0.707629	0.729	0.275	4.39e-101	In-10	Rtn4rl1
780	1.07e-83	0.705897	0.679	0.276	2.46e-79	In-10	Cpne8
781	8.15e-82	0.704449	0.902	0.631	1.88e-77	In-10	1700025G04Rik
782	6.35e-34	0.701091	0.823	0.646	1.46e-29	In-10	Nell1
783	4.41e-112	0.694227	0.981	0.969	1.02e-107	In-10	Syt1
784	7.43e-87	0.69014	0.769	0.325	1.71e-82	In-10	Gm20754
785	4.2e-44	0.676955	0.94	0.928	9.69e-40	In-10	Plcb1
786	2.12e-101	0.671366	0.987	0.966	4.9e-97	In-10	Cacna1d
787	6.01e-58	0.669437	0.771	0.477	1.39e-53	In-10	Tle4
788	4.07e-78	0.662407	0.938	0.739	9.38e-74	In-10	Cntnap4
789	5.23e-55	0.662329	0.803	0.53	1.21e-50	In-10	Samd5
790	1.66e-71	0.654144	0.921	0.689	3.84e-67	In-10	Carmil1
791	2.7e-68	0.638674	0.579	0.207	6.23e-64	In-10	Pde3a
792	1.84e-75	0.634199	0.938	0.833	4.24e-71	In-10	Slc4a10
793	3.27e-95	0.630423	0.994	0.964	7.55e-91	In-10	Astn2
794	2.89e-80	0.622051	0.833	0.427	6.66e-76	In-10	Igsf21
795	1.59e-66	0.620817	0.981	0.932	3.68e-62	In-10	Robo2
796	2.1e-47	0.620664	0.904	0.807	4.83e-43	In-10	Rgs7bp
797	2.69e-89	0.619144	0.568	0.168	6.2e-85	In-10	Hunk
798	7.66e-176	0.616143	0.423	0.035	1.77e-171	In-10	C1ql3
799	5.84e-64	0.615299	0.799	0.422	1.35e-59	In-10	Synpr
800	2.15e-66	0.610235	0.688	0.323	4.95e-62	In-10	Gm42439
801	7.87e-77	0.609645	0.744	0.329	1.82e-72	In-10	Otx2
802	3.24e-70	0.608075	0.936	0.763	7.48e-66	In-10	Sh3gl2
803	3.05e-76	0.607297	0.829	0.428	7.04e-72	In-10	Nrp2
804	2.74e-99	0.607021	0.991	0.982	6.32e-95	In-10	Grm5
805	1.21e-62	0.605442	0.917	0.776	2.78e-58	In-10	Slco3a1
806	1.96e-87	0.594791	0.647	0.229	4.51e-83	In-10	Dpy19l1
807	3.67e-94	0.593523	0.987	0.935	8.46e-90	In-10	Gria1
808	2.53e-55	0.586434	0.906	0.635	5.85e-51	In-10	Zfp385b
809	4.07e-77	0.580637	0.974	0.857	9.4e-73	In-10	Cntnap5a
810	3.42e-56	0.576972	0.776	0.478	7.89e-52	In-10	Sez6l
811	3.37e-49	0.574047	0.923	0.806	7.77e-45	In-10	Cacnb4
812	1.58e-207	0.573861	0.355	0.01	3.65e-203	In-10	Chrnb3
813	5.87e-52	0.572099	0.592	0.298	1.35e-47	In-10	Tmem65
814	1.96e-48	0.571776	0.763	0.488	4.52e-44	In-10	Macrod1
815	3.45e-68	0.571034	0.994	0.975	7.96e-64	In-10	Lrp1b
816	4.79e-26	0.56705	0.882	0.819	1.11e-21	In-10	Kcnq3
817	2.93e-75	0.563831	0.991	0.87	6.76e-71	In-10	Zfpm2
818	1.34e-95	0.563316	0.218	0.015	3.1e-91	In-10	Frem1
819	9.61e-52	0.56134	0.801	0.456	2.22e-47	In-10	Slit2
820	1.34e-53	0.554461	0.921	0.815	3.09e-49	In-10	Cttnbp2
821	2.34e-49	0.551361	0.526	0.235	5.39e-45	In-10	Lmo4
822	2.46e-59	0.550144	0.979	0.877	5.67e-55	In-10	Map1b
823	3.26e-79	0.547239	0.994	0.992	7.52e-75	In-10	Ctnna2
824	3.15e-48	0.538679	0.788	0.497	7.26e-44	In-10	Prkca
825	1.61e-40	0.535506	0.795	0.531	3.72e-36	In-10	Fstl4
826	2.16e-45	0.532355	0.754	0.475	4.97e-41	In-10	Ndst3
827	1.21e-62	0.532333	0.491	0.172	2.79e-58	In-10	Tmtc4
828	2.86e-51	0.531967	0.897	0.716	6.61e-47	In-10	Gad1
829	1.34e-111	0.53046	0.989	0.993	3.1e-107	In-10	Ank3
830	8.85e-66	0.527629	0.603	0.24	2.04e-61	In-10	Klhl13
831	7.89e-67	0.527594	0.769	0.343	1.82e-62	In-10	Rorb
832	2.08e-26	0.526532	0.726	0.491	4.8e-22	In-10	Gm28905
833	3.65e-68	0.524793	0.976	0.881	8.41e-64	In-10	Nav2
834	2.29e-59	0.521811	0.598	0.259	5.28e-55	In-10	Nrip3
835	3.37e-34	0.521426	0.842	0.656	7.77e-30	In-10	Chrm2
836	9.01e-80	0.519788	0.652	0.25	2.08e-75	In-10	Homer2
837	9.46e-50	0.519595	0.673	0.356	2.18e-45	In-10	2021-03-04
838	1.58e-52	0.514935	0.829	0.525	3.66e-48	In-10	Plppr1
839	2.17e-21	0.514073	0.801	0.704	5.01e-17	In-10	Fam19a2
840	1.37e-56	0.513944	0.893	0.604	3.16e-52	In-10	Maml3
841	2.76e-45	0.508639	0.288	0.078	6.38e-41	In-10	Tac1
842	6.39e-64	0.50821	0.994	0.943	1.47e-59	In-10	Nrg1
843	4.76e-39	0.50236	0.915	0.846	1.1e-34	In-10	Tmeff2
844	8.13e-60	0.501435	0.368	0.099	1.88e-55	In-10	Abtb2
845	1.3e-37	0.495912	0.556	0.272	3e-33	In-10	Eda
846	2.07e-112	0.495012	0.491	0.102	4.79e-108	In-10	Kcnk12
847	8.95e-47	0.494572	0.944	0.837	2.07e-42	In-10	Dock4
848	4.54e-40	0.493502	0.823	0.58	1.05e-35	In-10	Trps1
849	1.69e-55	0.493301	0.981	0.938	3.89e-51	In-10	Large1
850	2.18e-31	0.487002	0.861	0.714	5.03e-27	In-10	Atp2a2
851	5.99e-55	0.486513	0.979	0.844	1.38e-50	In-10	Cntn4
852	4.21e-38	0.481715	0.724	0.47	9.72e-34	In-10	Psd3
853	8.42e-05	0.478347	0.748	0.778	1	In-10	Brinp3
854	2.21e-27	0.475919	0.65	0.442	5.1e-23	In-10	Mtcl1
855	1.74e-41	0.475857	0.598	0.312	4.01e-37	In-10	Sash1
856	5.78e-53	0.474712	0.605	0.273	1.33e-48	In-10	Ankrd6
857	2.48e-36	0.471138	0.857	0.67	5.72e-32	In-10	Grm3
858	1.9e-27	0.463793	0.934	0.888	4.39e-23	In-10	Etl4
859	1.97e-118	0.462852	0.408	0.058	4.54e-114	In-10	Prima1
860	1.35e-12	0.461278	0.701	0.602	3.1e-08	In-10	Cdh13
861	4.92e-68	0.460336	0.378	0.091	1.13e-63	In-10	Hs3st2
862	0.00442417	0.458837	0.91	0.984	1	In-10	Pcdh9
863	2.37e-51	0.456532	0.812	0.488	5.46e-47	In-10	Zdhhc14
864	5.34e-42	0.456481	0.774	0.47	1.23e-37	In-10	Bcl11a
865	1.36e-50	0.455044	0.925	0.741	3.14e-46	In-10	Epha10
866	2.68e-15	0.450923	0.936	0.887	6.17e-11	In-10	Gm26848
867	2.28e-70	0.45024	0.329	0.069	5.26e-66	In-10	Cnih3
868	5.82e-58	0.449841	0.513	0.177	1.34e-53	In-10	4930509J09Rik
869	3.53e-28	0.444407	0.65	0.418	8.16e-24	In-10	Sncaip
870	1.99e-58	0.437387	0.974	0.933	4.59e-54	In-10	Rab3c
871	2.06e-65	0.43666	0.483	0.149	4.76e-61	In-10	Arhgap42
872	2.29e-64	0.435786	0.985	0.988	5.29e-60	In-10	Cadps
873	9.24e-16	0.434006	0.583	0.437	2.13e-11	In-10	Maml2
874	4.26e-41	0.433261	0.707	0.419	9.83e-37	In-10	Dcx
875	5.29e-20	0.432171	0.513	0.319	1.22e-15	In-10	Slit1
876	1.05e-38	0.428963	0.724	0.456	2.41e-34	In-10	Cabp1
877	7.64e-47	0.427366	0.44	0.166	1.76e-42	In-10	Gm45904
878	9.41e-57	0.426929	0.592	0.233	2.17e-52	In-10	Rftn1
879	9.74e-106	0.421909	0.214	0.011	2.25e-101	In-10	Gm20631
880	1.87e-39	0.413796	0.641	0.35	4.3e-35	In-10	Myo6
881	2.81e-48	0.413652	0.998	0.988	6.48e-44	In-10	Macrod2
882	8.76e-30	0.411488	0.496	0.256	2.02e-25	In-10	Marcks
883	4.46e-118	0.411487	0.31	0.029	1.03e-113	In-10	Gm19410
884	1.19e-62	0.407594	0.325	0.075	2.74e-58	In-10	Cracr2a
885	2.9e-34	0.405328	0.835	0.657	6.69e-30	In-10	Reps2
886	4.44e-28	0.403878	0.496	0.263	1.03e-23	In-10	Galnt10
887	8.28e-53	0.403129	0.506	0.194	1.91e-48	In-10	Vstm2b
888	3.9e-49	0.402534	0.481	0.18	9e-45	In-10	Sel1l3
889	4.44e-45	0.401124	0.936	0.75	1.03e-40	In-10	Elmo1
890	2.74e-148	0.400306	0.274	0.01	6.33e-144	In-10	Smoc2
891	2.52e-45	0.399504	0.592	0.266	5.81e-41	In-10	Lmo1
892	1.18e-30	0.398937	0.688	0.432	2.72e-26	In-10	Rph3a
893	3.34e-38	0.397281	0.556	0.259	7.71e-34	In-10	Wls
894	9.53e-38	0.391844	0.62	0.329	2.2e-33	In-10	Fyco1
895	2.18e-25	0.391572	0.605	0.387	5.03e-21	In-10	Man2a1
896	2.88e-28	0.38682	0.808	0.635	6.65e-24	In-10	Iqsec3
897	2.48e-35	0.386501	0.797	0.54	5.73e-31	In-10	Sesn3
898	2.65e-33	0.383378	0.635	0.356	6.12e-29	In-10	Rasgrf2
899	2.76e-21	0.383202	0.989	0.958	6.37e-17	In-10	Lrrc4c
900	2.68e-27	0.382804	0.545	0.303	6.18e-23	In-10	Gm15155
901	2.29e-31	0.382541	0.519	0.273	5.28e-27	In-10	Fmn1
902	5.7e-19	0.382202	0.611	0.426	1.32e-14	In-10	9630028H03Rik
903	1.93e-34	0.380413	0.524	0.252	4.46e-30	In-10	Gm48749
904	6.4e-72	0.375261	0.269	0.042	1.48e-67	In-10	Cxcl14
905	4.19e-37	0.373947	0.436	0.183	9.67e-33	In-10	Gm48727
906	2.11e-34	0.371781	0.97	0.917	4.86e-30	In-10	Celf4
907	1.4e-30	0.371404	0.825	0.645	3.24e-26	In-10	Slc6a1
908	3.59e-132	0.371207	0.288	0.018	8.28e-128	In-10	Scube2
909	1.95e-71	2.25308	0.852	0.134	4.51e-67	In-9	Prkd1
910	2.31e-39	1.71145	0.951	0.341	5.33e-35	In-9	Col25a1
911	8.75e-28	1.55427	0.885	0.47	2.02e-23	In-9	Epha3
912	9.36e-36	1.35102	0.984	0.341	2.16e-31	In-9	Meis2
913	6.05e-25	1.32454	0.852	0.39	1.4e-20	In-9	Fras1
914	6.36e-29	1.31227	0.984	0.732	1.47e-24	In-9	Thsd7b
915	9.76e-24	1.15053	1	0.884	2.25e-19	In-9	Trpm3
916	1.38e-36	1.13457	0.836	0.198	3.17e-32	In-9	Gm38505
917	1.27e-19	1.11117	0.852	0.645	2.93e-15	In-9	Mgat5
918	7.4e-23	1.10136	0.902	0.542	1.71e-18	In-9	Itpr1
919	1.52e-30	1.08156	0.738	0.211	3.5e-26	In-9	Chn2
920	2.36e-40	1.06957	0.689	0.134	5.45e-36	In-9	Trpc4
921	2.51e-18	1.06934	0.934	0.771	5.79e-14	In-9	Brinp3
922	1.45e-23	1.05676	1	0.624	3.34e-19	In-9	Ptprm
923	2.48e-21	1.05386	0.967	0.749	5.73e-17	In-9	Tenm1
924	4.21e-22	0.981115	0.967	0.81	9.72e-18	In-9	Ptchd4
925	1.17e-15	0.9344	0.803	0.385	2.71e-11	In-9	Pard3b
926	1.29e-13	0.927857	0.738	0.385	2.97e-09	In-9	Chsy3
927	3.28e-18	0.924745	0.918	0.61	7.56e-14	In-9	Cdh13
928	4.95e-17	0.901198	0.77	0.364	1.14e-12	In-9	Sema5a
929	1.04e-19	0.882805	0.902	0.526	2.39e-15	In-9	Rbms1
930	2.37e-15	0.877957	0.803	0.509	5.48e-11	In-9	Tle4
931	2.37e-21	0.861658	0.689	0.224	5.47e-17	In-9	AC129186.1
932	5.35e-12	0.843597	0.426	0.146	1.23e-07	In-9	Adamts18
933	5.01e-15	0.841228	0.738	0.402	1.16e-10	In-9	Ptpro
934	1.31e-16	0.835537	1	0.974	3.02e-12	In-9	Pcdh9
935	6.1e-17	0.835062	0.377	0.086	1.41e-12	In-9	Gm28376
936	1.16e-19	0.834004	0.984	0.977	2.67e-15	In-9	Lrp1b
937	2.63e-21	0.833158	0.984	0.898	6.07e-17	In-9	Kcnip4
938	1.02e-12	0.832727	0.574	0.249	2.36e-08	In-9	Ndst4
939	1.93e-18	0.814485	1	0.942	4.45e-14	In-9	Auts2
940	1.4e-18	0.799709	0.508	0.14	3.23e-14	In-9	Sema3c
941	2.72e-18	0.792678	1	0.798	6.27e-14	In-9	Khdrbs2
942	5.15e-09	0.787849	0.787	0.638	0.000118805	In-9	Maml3
943	1.15e-13	0.787456	0.918	0.744	2.65e-09	In-9	Kcnh7
944	2.31e-15	0.744892	0.967	0.843	5.33e-11	In-9	Hdac9
945	9.77e-15	0.744791	0.705	0.336	2.25e-10	In-9	Utrn
946	4.12e-18	0.737092	1	0.857	9.51e-14	In-9	Dgkb
947	6.04e-12	0.731689	0.574	0.261	1.39e-07	In-9	Mgll
948	2.41e-25	0.724032	0.541	0.126	5.56e-21	In-9	Foxp4
949	1.68e-15	0.69739	0.984	0.817	3.87e-11	In-9	Cdh12
950	2.82e-15	0.686483	0.967	0.938	6.5e-11	In-9	Robo2
951	6.11e-13	0.68502	0.82	0.655	1.41e-08	In-9	Atp2c1
952	3.25e-13	0.673566	0.951	0.678	7.49e-09	In-9	Chrm3
953	1.81e-14	0.667716	0.967	0.529	4.18e-10	In-9	Foxp2
954	2.52e-10	0.666824	0.77	0.499	5.82e-06	In-9	Vav3
955	3.95e-15	0.666344	1	0.767	9.12e-11	In-9	Tshz2
956	1.62e-12	0.658592	0.869	0.596	3.73e-08	In-9	Slc35f4
957	1.45e-05	0.649106	0.393	0.21	0.334279	In-9	Gm15584
958	5.63e-10	0.648605	0.623	0.343	1.3e-05	In-9	Chrna7
959	1.83e-10	0.647886	0.852	0.74	4.23e-06	In-9	Mast4
960	1.5e-15	0.644918	1	0.98	3.47e-11	In-9	Lingo2
961	1.46e-16	0.642508	0.984	0.98	3.38e-12	In-9	Dpp6
962	5.2e-12	0.641888	0.754	0.396	1.2e-07	In-9	Sphkap
963	1.28e-10	0.641647	0.607	0.341	2.95e-06	In-9	Scrn1
964	4.18e-07	0.626813	0.59	0.377	0.00963733	In-9	Arhgap24
965	1.43e-11	0.617248	0.951	0.822	3.3e-07	In-9	Slc24a3
966	6.58e-08	0.614475	0.672	0.441	0.00151927	In-9	Kcnab1
967	4.42e-13	0.613152	0.984	0.922	1.02e-08	In-9	Mapk10
968	9.12e-12	0.604635	0.607	0.27	2.1e-07	In-9	Prex2
969	2.02e-10	0.603268	0.967	0.851	4.65e-06	In-9	Ptprg
970	1.98e-11	0.593924	0.77	0.451	4.57e-07	In-9	Maml2
971	2.18e-10	0.588978	0.836	0.56	5.04e-06	In-9	Fstl4
972	1.59e-15	0.570496	0.393	0.098	3.67e-11	In-9	Prima1
973	1.93e-13	0.568064	1	0.962	4.44e-09	In-9	Opcml
974	1.13e-09	0.56611	0.41	0.154	2.61e-05	In-9	Arap2
975	1.24e-06	0.564974	0.672	0.457	0.0286465	In-9	Fam19a1
976	7.17e-10	0.563141	0.885	0.618	1.66e-05	In-9	Gm26883
977	1.67e-11	0.559496	0.984	0.957	3.84e-07	In-9	Rbfox1
978	1.18e-06	0.551965	0.443	0.246	0.027172	In-9	Nudt4
979	5.85e-08	0.551463	0.721	0.465	0.00134894	In-9	Slc44a5
980	1.79e-09	0.551274	0.803	0.543	4.13e-05	In-9	Msra
981	3.86e-07	0.549825	0.443	0.209	0.00891723	In-9	Csgalnact1
982	1.08e-06	0.549225	0.607	0.362	0.0248998	In-9	Tmem132c
983	1.23e-07	0.549026	0.836	0.785	0.00283337	In-9	Ano4
984	2.33e-07	0.546867	0.902	0.82	0.00537384	In-9	Slc35f1
985	5.5e-10	0.546582	0.721	0.385	1.27e-05	In-9	Nckap5
986	7.77e-06	0.544088	0.623	0.477	0.179327	In-9	Rnf152
987	1.12e-16	0.543263	0.23	0.033	2.57e-12	In-9	Ndnf
988	3.37e-06	0.540679	0.869	0.855	0.0777166	In-9	Tmeff2
989	1.01e-09	0.536169	0.885	0.649	2.32e-05	In-9	Dgkh
990	3.19e-20	0.523359	0.246	0.032	7.35e-16	In-9	Crb1
991	1.34e-05	0.522999	0.672	0.497	0.308128	In-9	Slit2
992	1.8e-05	0.519662	0.557	0.404	0.416352	In-9	Tmem150c
993	5.39e-05	0.514755	0.508	0.338	1	In-9	Vstm2l
994	3.58e-06	0.505147	0.393	0.188	0.0825515	In-9	Arhgap42
995	1.19e-13	0.503683	0.361	0.095	2.75e-09	In-9	Abca1
996	6e-09	0.500338	0.984	0.907	0.000138556	In-9	Tenm3
997	7.96e-09	0.497479	0.967	0.8	0.000183675	In-9	Mgat4c
998	1.28e-08	0.496309	0.869	0.601	0.000294356	In-9	Grik1
999	8.82e-13	0.494673	0.262	0.054	2.04e-08	In-9	Adamts19
1000	4.48e-05	0.494628	0.623	0.489	1	In-9	Pcdh10
1001	1.74e-05	0.48966	0.77	0.659	0.401863	In-9	Pacs1
1002	1.71e-08	0.488976	0.951	0.662	0.000395719	In-9	Otx2os1
1003	0.00454174	0.488365	0.344	0.245	1	In-9	Plxnc1
1004	7.64e-12	0.488077	1	0.992	1.76e-07	In-9	Ntm
1005	4.72e-07	0.476821	0.344	0.143	0.010886	In-9	Ptpn13
1006	4.05e-05	0.475315	0.311	0.141	0.934244	In-9	Lypd1
1007	0.000130668	0.474979	0.475	0.331	1	In-9	Kirrel
1008	9.98e-09	0.472783	0.951	0.765	0.000230389	In-9	Sgcd
1009	5.45e-07	0.468803	0.443	0.211	0.0125766	In-9	Tmem132cos
1010	3.83e-05	0.467214	0.525	0.34	0.883371	In-9	Fat4
1011	2.38e-07	0.465809	0.902	0.678	0.00548841	In-9	Egfem1
1012	1.44e-05	0.465497	0.443	0.266	0.331145	In-9	Pik3r1
1013	7.09e-11	0.462932	1	0.958	1.64e-06	In-9	Pcdh7
1014	0.00121873	0.462694	0.557	0.543	1	In-9	Ophn1
1015	2.29e-11	0.45941	0.295	0.075	5.29e-07	In-9	Cbln4
1016	0.000119518	0.458286	0.459	0.299	1	In-9	Fam184b
1017	0.000253512	0.45336	0.639	0.569	1	In-9	Zfp608
1018	3.84e-06	0.453135	0.574	0.366	0.0885315	In-9	Gm42439
1019	4.48e-06	0.452865	0.705	0.508	0.10338	In-9	Ndst3
1020	4.83e-05	0.452723	0.574	0.436	1	In-9	Bcl9
1021	9.96e-06	0.451566	0.393	0.202	0.22981	In-9	Tshz1
1022	6.02e-09	0.451221	0.967	0.968	0.000138887	In-9	Astn2
1023	0.000167057	0.450877	0.672	0.501	1	In-9	Prr16
1024	5.36e-06	0.450799	0.41	0.217	0.123654	In-9	Ildr2
1025	1.26e-06	0.450109	0.689	0.428	0.0290623	In-9	Zfp536
1026	3.04e-24	0.447447	0.213	0.02	7.02e-20	In-9	Prkcq
1027	1.02e-09	0.447161	0.279	0.075	2.34e-05	In-9	Mob3b
1028	3.33e-05	0.444009	1	0.875	0.767748	In-9	Cntn5
1029	4.63e-07	0.443489	0.377	0.159	0.0106917	In-9	Gm27151
1030	1.77e-11	0.440607	0.295	0.075	4.08e-07	In-9	G630016G05Rik
1031	5.16e-10	0.43955	0.328	0.096	1.19e-05	In-9	Lrp4
1032	1.21e-06	0.436004	0.295	0.105	0.0280285	In-9	Hmcn1
1033	0.00132862	0.43361	0.607	0.532	1	In-9	Rnf180
1034	1.38e-06	0.428293	0.311	0.123	0.0319188	In-9	Mdga1
1035	1.98e-05	0.423013	0.869	0.788	0.456227	In-9	Asic2
1036	6.88e-07	0.419732	0.852	0.745	0.0158709	In-9	Tcf12
1037	0.00144563	0.416078	0.59	0.486	1	In-9	Syndig1
1038	3.74e-05	0.4081	0.344	0.175	0.863424	In-9	Sh3bgrl
1039	0.000190145	0.407135	0.656	0.533	1	In-9	Bcl2
1040	1.13e-05	0.406253	0.836	0.715	0.260852	In-9	Fam19a2
1041	0.000121368	0.405403	0.525	0.386	1	In-9	Sh3rf1
1042	2.44e-05	0.400804	0.656	0.476	0.563423	In-9	Igsf21
1043	0.00179639	0.399605	0.426	0.293	1	In-9	Cpne5
1044	0.000519475	0.397241	0.361	0.205	1	In-9	A330015K06Rik
1045	0.00667294	0.393625	0.41	0.295	1	In-9	Wls
1046	1.53e-06	0.393609	0.82	0.581	0.0353651	In-9	Sema6d
1047	0.00126929	0.392597	0.41	0.287	1	In-9	Gm5441
1048	0.000327661	0.387986	0.82	0.764	1	In-9	Ank1
1049	7.12e-07	0.387133	0.689	0.453	0.0164214	In-9	Tox3
1050	7.7e-06	0.384438	0.803	0.533	0.177754	In-9	Htr2c
1051	0.00220267	0.382825	0.492	0.361	1	In-9	Stac
1052	0.00581996	0.382348	0.328	0.227	1	In-9	Mb21d2
1053	0.00016663	0.382014	0.754	0.675	1	In-9	Bach2
1054	0.000106175	0.381736	0.262	0.118	1	In-9	Jun
1055	0.00269746	0.380993	0.508	0.42	1	In-9	Usp46
1056	0.000564349	0.375855	0.279	0.149	1	In-9	Cd83
1057	0.000105005	0.370837	0.508	0.338	1	In-9	Wscd2
1058	6.98e-05	0.370549	0.803	0.717	1	In-9	Btbd11
1059	0.00181833	0.369913	0.344	0.231	1	In-9	Cnst
1060	1.48e-05	0.368583	0.246	0.093	0.342194	In-9	Pard3bos1
1061	0.000173725	0.368144	0.852	0.877	1	In-9	Setbp1
1062	0.0033968	0.367021	0.508	0.438	1	In-9	E130308A19Rik
1063	3.03e-07	0.362676	0.295	0.103	0.00699275	In-9	1700016K05Rik
1064	4.54e-09	0.360528	0.279	0.082	0.000104658	In-9	Oprk1
1065	0.00433279	0.358642	0.279	0.168	1	In-9	Ptgfrn
1066	3.35e-09	0.35331	0.885	0.746	7.72e-05	In-9	Tspan5
1067	4.29e-06	0.346454	0.934	0.93	0.0988968	In-9	Ppp3ca
1068	1.54e-06	0.346204	0.148	0.035	0.035643	In-9	Jph1
1069	0.000976668	0.344688	0.689	0.648	1	In-9	Mtss1
1070	0.0025002	0.340408	0.393	0.278	1	In-9	3632451O06Rik
1071	0.000434135	0.340325	0.639	0.477	1	In-9	Nrp2
1072	1.33e-06	0.33945	0.885	0.606	0.0307076	In-9	Sorcs1
1073	0.000393877	0.339261	0.443	0.28	1	In-9	Dpy19l1
1074	0.00139167	0.33608	0.689	0.66	1	In-9	Rnf150
1075	3.72e-06	0.335199	0.492	0.246	0.0857515	In-9	Ankfn1
1076	0.000487146	0.32918	0.836	0.773	1	In-9	Elmo1
1077	0.000887735	0.327649	0.426	0.295	1	In-9	Rps9
1078	1.88e-06	0.323838	0.984	0.839	0.0434816	In-9	Prkg1
1079	1.2e-05	0.321118	0.918	0.916	0.276823	In-9	Dmd
1080	2.39e-05	0.32072	0.836	0.819	0.552391	In-9	Rgs7bp
1081	0.00764452	0.319557	0.492	0.433	1	In-9	Lrp6
1082	4.09e-06	0.318878	0.934	0.97	0.0943435	In-9	Rere
1083	1.21e-05	0.317517	0.967	0.938	0.280014	In-9	Rab3c
1084	0.00740785	0.316843	0.23	0.135	1	In-9	Eif3b
1085	0.00116727	0.316575	0.836	0.842	1	In-9	Eml5
1086	0.00102241	0.313207	0.918	0.939	1	In-9	Hivep2
1087	0.00308895	0.312801	0.721	0.662	1	In-9	Gm48091
1088	1.97e-05	0.31246	1	0.883	0.454771	In-9	Zfpm2
1089	0.00108229	0.311278	0.328	0.198	1	In-9	AI593442
1090	0.000117385	0.303662	0.197	0.073	1	In-9	Gm38399
1091	0.00611424	0.303409	0.377	0.27	1	In-9	Axin2
1092	2.84e-05	0.29827	0.279	0.118	0.656246	In-9	St8sia6
1093	0.000458315	0.296671	0.869	0.853	1	In-9	Phf21a
1094	0.00525785	0.296079	0.18	0.089	1	In-9	Ccnj
1095	0.00179518	0.295905	0.377	0.245	1	In-9	Epb41l5
1096	0.000105487	0.294977	0.607	0.418	1	In-9	Cdh11
1097	0.00197505	0.29458	0.443	0.313	1	In-9	Ankrd6
1098	0.00468728	0.291178	0.623	0.578	1	In-9	Acadsb
1099	0.00122629	0.287145	0.574	0.462	1	In-9	Atp11c
1100	0.00139719	0.28656	0.197	0.089	1	In-9	Pcdh20
1101	0.00162751	0.284861	0.262	0.143	1	In-9	AI504432
1102	0.00285072	0.283743	0.607	0.485	1	In-9	Flrt2
1103	1.21e-12	0.279734	0.148	0.019	2.78e-08	In-9	Tmem215
1104	0.000370519	0.279318	0.951	0.943	1	In-9	Large1
1105	0.00472436	0.27913	0.803	0.752	1	In-9	Mbnl2
1106	0.000689936	0.278042	0.672	0.532	1	In-9	Prkca
1107	0.00837409	0.277783	0.41	0.31	1	In-9	Usp3
1108	6.57e-06	0.277105	0.934	0.734	0.151702	In-9	Tmem108
1109	5.88e-102	1.58374	0.969	0.476	1.36e-97	In-2	Il1rapl2
1110	2.18e-124	1.53003	0.93	0.312	5.02e-120	In-2	Tmem132d
1111	6.75e-97	1.36776	0.978	0.535	1.56e-92	In-2	Nxph1
1112	3.9e-87	1.14625	1	0.772	8.99e-83	In-2	Kirrel3
1113	1.97e-81	1.13458	0.93	0.541	4.55e-77	In-2	Fstl4
1114	3.58e-73	1.04557	0.938	0.595	8.26e-69	In-2	Rasgef1b
1115	4.11e-74	1.0354	0.63	0.182	9.49e-70	In-2	Gbe1
1116	3.06e-68	0.983009	0.943	0.696	7.07e-64	In-2	Spock1
1117	2.11e-58	0.922492	0.943	0.589	4.87e-54	In-2	Sorcs1
1118	2.57e-21	0.915924	0.573	0.357	5.93e-17	In-2	Sema5a
1119	2.06e-43	0.910955	0.546	0.211	4.75e-39	In-2	Tmem163
1120	3.84e-85	0.908716	0.996	0.956	8.85e-81	In-2	Dab1
1121	2.27e-64	0.892401	0.793	0.337	5.23e-60	In-2	Tfap2b
1122	2.35e-47	0.874948	0.85	0.608	5.42e-43	In-2	Galnt18
1123	2.48e-37	0.832432	0.744	0.372	5.71e-33	In-2	Hs3st4
1124	2.4e-52	0.797736	0.921	0.622	5.53e-48	In-2	Cdh8
1125	1.04e-68	0.783675	0.996	0.99	2.41e-64	In-2	Cadm2
1126	3.64e-43	0.726094	0.824	0.539	8.4e-39	In-2	Srrm4
1127	1.16e-31	0.716155	0.621	0.318	2.67e-27	In-2	Htr1f
1128	3.17e-30	0.705691	0.683	0.379	7.31e-26	In-2	Rorb
1129	2.18e-47	0.705172	0.969	0.81	5.04e-43	In-2	Cdh12
1130	3.11e-37	0.6992	0.912	0.719	7.18e-33	In-2	Gm26905
1131	1.2e-75	0.696408	0.489	0.096	2.78e-71	In-2	Kit
1132	2.49e-26	0.694109	0.643	0.402	5.74e-22	In-2	Syt9
1133	3.1e-51	0.692238	0.982	0.743	7.14e-47	In-2	Zfhx3
1134	4.72e-29	0.678269	0.661	0.36	1.09e-24	In-2	A330008L17Rik
1135	1.53e-49	0.674324	0.982	0.891	3.52e-45	In-2	Grip1
1136	1.71e-28	0.662559	0.762	0.467	3.94e-24	In-2	Trpc5
1137	4.33e-30	0.659407	0.916	0.756	1e-25	In-2	Kcnip1
1138	3.09e-42	0.656296	0.996	0.945	7.12e-38	In-2	Galntl6
1139	2.1e-36	0.647011	0.551	0.222	4.86e-32	In-2	Hcrtr2
1140	6.64e-27	0.627255	0.815	0.61	1.53e-22	In-2	Grin3a
1141	1.12e-26	0.625457	0.533	0.255	2.58e-22	In-2	Il1rap
1142	2.59e-36	0.620637	0.956	0.856	5.99e-32	In-2	Unc5c
1143	9.72e-22	0.607206	0.559	0.331	2.24e-17	In-2	Galnt7
1144	1.24e-34	0.595811	0.705	0.344	2.86e-30	In-2	Tmem132c
1145	3.35e-33	0.586984	0.604	0.283	7.74e-29	In-2	2700069I18Rik
1146	4.98e-45	0.58571	0.974	0.656	1.15e-40	In-2	Ptprt
1147	4.65e-20	0.573911	0.551	0.327	1.07e-15	In-2	Vstm2l
1148	2.43e-24	0.565111	0.643	0.406	5.61e-20	In-2	Cacng3
1149	3.23e-23	0.557891	0.683	0.466	7.46e-19	In-2	Rnf152
1150	1.59e-27	0.555362	0.537	0.244	3.68e-23	In-2	Man1a
1151	1.63e-33	0.554848	0.987	0.911	3.76e-29	In-2	Dmd
1152	2.64e-19	0.544199	0.775	0.548	6.09e-15	In-2	Rtl4
1153	2.16e-25	0.540918	0.846	0.738	4.99e-21	In-2	Stxbp5
1154	3.8e-30	0.539403	0.427	0.161	8.78e-26	In-2	Sulf2
1155	1.59e-26	0.537349	0.555	0.273	3.67e-22	In-2	Pax7
1156	1.21e-27	0.531823	0.903	0.694	2.79e-23	In-2	Zfhx4
1157	2.15e-08	0.530563	0.379	0.245	0.000496672	In-2	Slc15a2
1158	2.89e-12	0.528116	0.537	0.403	6.66e-08	In-2	Ptn
1159	8.6e-24	0.521546	0.811	0.623	1.98e-19	In-2	Grik4
1160	1.49e-17	0.519962	0.599	0.4	3.44e-13	In-2	Kcnj6
1161	4.58e-19	0.519446	0.692	0.538	1.06e-14	In-2	Map7
1162	3.95e-31	0.502814	0.392	0.133	9.11e-27	In-2	Tmem178
1163	5.88e-15	0.493923	0.507	0.308	1.36e-10	In-2	BC030499
1164	1.74e-22	0.485602	0.837	0.618	4.01e-18	In-2	Pbx3
1165	2.66e-15	0.469125	0.507	0.295	6.13e-11	In-2	Tcerg1l
1166	5.27e-10	0.468556	0.67	0.515	1.22e-05	In-2	Gm28928
1167	4.31e-17	0.459169	0.454	0.244	9.94e-13	In-2	Slc4a4
1168	1.01e-42	0.455693	1	0.992	2.34e-38	In-2	Ntm
1169	3.36e-20	0.453318	0.925	0.855	7.75e-16	In-2	Dgkb
1170	1.58e-13	0.451245	0.643	0.502	3.64e-09	In-2	Sgk1
1171	3.34e-17	0.44992	0.797	0.717	7.72e-13	In-2	CT025619.1
1172	9.62e-24	0.448485	0.282	0.089	2.22e-19	In-2	Lmo2
1173	9.53e-15	0.443626	0.771	0.703	2.2e-10	In-2	Ppm1l
1174	1.66e-15	0.443021	0.577	0.374	3.83e-11	In-2	Tead1
1175	4.24e-15	0.442883	0.652	0.471	9.79e-11	In-2	Gm16083
1176	6.75e-17	0.438751	0.912	0.866	1.56e-12	In-2	Foxn3
1177	3.22e-36	0.427793	0.3	0.068	7.42e-32	In-2	Arhgap31
1178	2.6e-18	0.426584	0.295	0.112	6e-14	In-2	Trpc7
1179	1.77e-28	0.425286	0.991	0.938	4.08e-24	In-2	Fat3
1180	3.38e-15	0.423707	0.687	0.504	7.81e-11	In-2	Sez6l
1181	7.24e-19	0.417927	0.93	0.767	1.67e-14	In-2	Lhfpl3
1182	6.73e-11	0.415613	0.542	0.38	1.55e-06	In-2	Kcnt2
1183	2.86e-08	0.41305	0.661	0.537	0.000660799	In-2	Efna5
1184	1.73e-13	0.41269	0.731	0.624	3.99e-09	In-2	Khdrbs3
1185	8.08e-17	0.406676	0.952	0.724	1.86e-12	In-2	Pcdh15
1186	4.52e-16	0.394952	0.916	0.931	1.04e-11	In-2	Ppp3ca
1187	1.16e-11	0.390713	0.78	0.743	2.69e-07	In-2	Epb41
1188	1.48e-17	0.389497	0.423	0.201	3.41e-13	In-2	Tmem132cos
1189	7.08e-27	0.389323	1	0.994	1.63e-22	In-2	Rora
1190	6.38e-07	0.389055	0.463	0.352	0.0147132	In-2	Vat1l
1191	8.29e-28	0.387673	0.26	0.066	1.91e-23	In-2	Pcsk6
1192	3.13e-26	0.386158	0.982	0.977	7.22e-22	In-2	Grid2
1193	3.96e-16	0.378825	0.458	0.243	9.13e-12	In-2	Maf
1194	1.54e-19	0.37575	0.974	0.969	3.56e-15	In-2	Cacna1d
1195	1.62e-23	0.373196	1	0.988	3.75e-19	In-2	Ptprd
1196	1.15e-09	0.370029	0.709	0.518	2.66e-05	In-2	Gm15398
1197	1.03e-08	0.368057	0.361	0.231	0.000238131	In-2	Adamts3
1198	3.06e-12	0.367116	0.855	0.86	7.06e-08	In-2	Stxbp5l
1199	1.93e-21	0.363214	0.943	0.852	4.46e-17	In-2	Ntrk3
1200	0.00383076	0.363208	0.722	0.756	1	In-2	Cntnap5b
1201	4.11e-13	0.358189	0.542	0.354	9.47e-09	In-2	Trpc3
1202	1.19e-12	0.353657	0.304	0.144	2.75e-08	In-2	Ust
1203	4.51e-09	0.352508	0.59	0.482	0.000104059	In-2	Camk4
1204	2.89e-17	0.352275	0.982	0.879	6.67e-13	In-2	Zfpm2
1205	2.62e-08	0.351982	0.577	0.473	0.000604445	In-2	Igsf21
1206	9.51e-14	0.350484	0.85	0.727	2.19e-09	In-2	Thrb
1207	1e-12	0.349633	0.705	0.564	2.31e-08	In-2	Smarca2
1208	2.53e-13	0.347077	0.863	0.788	5.83e-09	In-2	Thsd7a
1209	1.53e-08	0.341608	0.722	0.659	0.000353276	In-2	Gm48091
1210	9.99e-11	0.339545	0.872	0.815	2.3e-06	In-2	Apba1
1211	1.33e-12	0.338042	0.93	0.779	3.06e-08	In-2	Lrrtm3
1212	2.65e-10	0.332988	0.899	0.871	6.11e-06	In-2	Grid1
1213	3.98e-13	0.328868	0.943	0.844	9.19e-09	In-2	Ctnna3
1214	1.53e-14	0.32717	0.26	0.102	3.53e-10	In-2	Boc
1215	6.88e-15	0.326996	0.868	0.66	1.59e-10	In-2	Arpp21
1216	2.61e-11	0.325491	0.194	0.074	6.03e-07	In-2	Pappa
1217	1.12e-06	0.324965	0.37	0.257	0.0259144	In-2	Gm48742
1218	3.64e-11	0.323844	0.767	0.681	8.4e-07	In-2	Gramd1b
1219	5.71e-09	0.323229	0.357	0.209	0.000131654	In-2	Plpp4
1220	6.35e-09	0.320914	0.335	0.199	0.000146465	In-2	Btg1
1221	1.09e-09	0.318901	0.374	0.231	2.51e-05	In-2	Ppp1r1a
1222	2.46e-22	0.318867	0.991	0.979	5.67e-18	In-2	Dpp6
1223	1.89e-09	0.318677	0.718	0.591	4.37e-05	In-2	Epha4
1224	1.65e-09	0.317058	0.396	0.252	3.81e-05	In-2	Pde9a
1225	1.08e-16	0.316793	0.273	0.105	2.49e-12	In-2	Gm16226
1226	3.45e-17	0.313094	0.22	0.069	7.96e-13	In-2	Slc24a4
1227	8.94e-22	0.31266	0.264	0.082	2.06e-17	In-2	Plekhd1
1228	4.53e-11	0.31224	0.846	0.827	1.04e-06	In-2	Ppm1e
1229	3.89e-15	0.311344	0.78	0.525	8.98e-11	In-2	Sdk1
1230	3.04e-09	0.309965	0.775	0.747	7.02e-05	In-2	Phf14
1231	1.75e-09	0.307339	0.304	0.168	4.03e-05	In-2	Pcp4l1
1232	6.41e-10	0.304719	0.925	0.857	1.48e-05	In-2	Slc8a1
1233	7.96e-07	0.303994	0.678	0.619	0.0183678	In-2	Cachd1
1234	8.02e-09	0.303782	0.833	0.821	0.000185004	In-2	Arl15
1235	0.00359135	0.303762	0.568	0.518	1	In-2	Gm28905
1236	9.04e-07	0.302446	0.551	0.472	0.0208581	In-2	Pag1
1237	2.37e-07	0.301924	0.683	0.586	0.00547966	In-2	Epha7
1238	8.14e-05	0.301368	0.498	0.436	1	In-2	Ppp1r14c
1239	2.49e-06	0.300655	0.295	0.184	0.0574375	In-2	Lima1
1240	6.07e-09	0.299285	0.211	0.096	0.000140044	In-2	Tiam2
1241	2.04e-59	0.298256	0.172	0.011	4.71e-55	In-2	Folh1
1242	2.99e-09	0.297413	0.652	0.527	6.91e-05	In-2	Cux2
1243	6.54e-09	0.297162	0.542	0.379	0.000150807	In-2	Cdh22
1244	6.33e-11	0.296153	0.396	0.233	1.46e-06	In-2	Sox14
1245	0.000121986	0.295653	0.595	0.531	1	In-2	Frmd4b
1246	7.55e-08	0.293568	0.621	0.45	0.00174223	In-2	Fam19a1
1247	5.45e-22	0.293367	0.189	0.045	1.26e-17	In-2	Gm2115
1248	2.81e-06	0.29171	0.559	0.486	0.0649164	In-2	Cabp1
1249	1.57e-08	0.291255	0.74	0.695	0.000362176	In-2	Plekha6
1250	5.75e-10	0.289316	0.806	0.726	1.33e-05	In-2	Enox1
1251	9.27e-10	0.288278	0.749	0.646	2.14e-05	In-2	Dgkh
1252	1.09e-09	0.287085	0.819	0.7	2.51e-05	In-2	Rit2
1253	1.75e-09	0.285442	0.85	0.793	4.04e-05	In-2	Nedd4l
1254	1.01e-06	0.284771	0.537	0.456	0.0233991	In-2	Patj
1255	3.17e-14	0.283274	0.471	0.24	7.32e-10	In-2	Pde3a
1256	2.95e-13	0.282019	0.943	0.915	6.82e-09	In-2	Phactr1
1257	7.53e-06	0.281707	0.357	0.253	0.173736	In-2	Plk5
1258	8.53e-08	0.281436	0.388	0.259	0.00196902	In-2	Sox11
1259	2.53e-10	0.279613	0.934	0.906	5.84e-06	In-2	Pam
1260	6.8e-05	0.279293	0.529	0.442	1	In-2	Sncaip
1261	0.00458055	0.278877	0.357	0.322	1	In-2	Fam20b
1262	9.33e-06	0.278395	0.357	0.25	0.215383	In-2	Parva
1263	3.15e-07	0.278142	0.313	0.192	0.00725748	In-2	Lncbate1
1264	1.48e-08	0.27525	0.238	0.119	0.000340862	In-2	Ntn4
1265	2.16e-16	0.27474	0.996	0.96	4.99e-12	In-2	Opcml
1266	0.00209977	0.273618	0.37	0.318	1	In-2	Als2
1267	1.19e-05	0.272674	0.383	0.292	0.274909	In-2	Lrrn3
1268	0.000132853	0.270861	0.507	0.43	1	In-2	B3glct
1269	0.000841656	0.268912	0.352	0.289	1	In-2	Galnt10
1270	1.25e-07	0.26801	0.542	0.399	0.00288793	In-2	Ptpro
1271	3.34e-07	0.267189	0.396	0.264	0.007714	In-2	Pde1c
1272	6.98e-05	0.265177	0.489	0.427	1	In-2	Far2
1273	2.81e-08	0.264905	0.22	0.108	0.00064896	In-2	Nkd2
1274	9.62e-13	0.26428	0.965	0.778	2.22e-08	In-2	Asic2
1275	1.01e-07	0.263832	0.837	0.821	0.00233194	In-2	Garnl3
1276	2.32e-08	0.263458	0.784	0.648	0.000536142	In-2	Edil3
1277	8.53e-08	0.263069	0.789	0.786	0.00196792	In-2	Ica1
1278	7.92e-06	0.262039	0.507	0.409	0.182785	In-2	Man2a1
1279	6.74e-07	0.261822	0.308	0.195	0.0155575	In-2	Gm15520
1280	8.64e-08	0.261589	0.313	0.183	0.00199381	In-2	Rgs9
1281	5.39e-06	0.261292	0.454	0.341	0.124319	In-2	Chrna7
1282	8.43e-07	0.261045	0.26	0.15	0.019455	In-2	Rgs3
1283	0.000343832	0.260399	0.758	0.751	1	In-2	Dtna
1284	8.89e-07	0.258583	0.722	0.668	0.0205221	In-2	Camk2a
1285	1.96e-05	0.257364	0.211	0.122	0.452867	In-2	Necab1
1286	2.11e-10	0.257005	0.167	0.062	4.87e-06	In-2	Cck
1287	1.32e-06	0.25622	0.806	0.789	0.0305135	In-2	Stxbp1
1288	4.49e-05	0.255984	0.344	0.254	1	In-2	Camkv
1289	2.58e-13	0.255319	0.101	0.022	5.96e-09	In-2	Hnf4g
1290	9.67e-06	0.254137	0.242	0.147	0.223095	In-2	Nrep
1291	1.56e-10	0.254065	0.978	0.971	3.6e-06	In-2	Celf2
1292	1.18e-09	0.252134	0.899	0.843	2.73e-05	In-2	Tnr
1293	6.38e-05	0.251174	0.361	0.271	1	In-2	Pou2f2
1294	1.6e-11	0.25074	0.815	0.591	3.7e-07	In-2	Grik1
1295	3.2e-47	0.250225	0.11	0.005	7.39e-43	In-2	Bmp5
1296	1.2e-05	0.250082	0.344	0.232	0.277196	In-2	Cdh20
1297	7.13e-07	0.25008	0.524	0.391	0.0164419	In-2	Sorcs2
1298	8.68e-88	1.94123	0.824	0.293	2e-83	In-7	Erbb4
1299	0	1.70054	0.872	0.044	0	In-7	Ebf3
1300	2.45e-85	1.68884	0.545	0.098	5.65e-81	In-7	Ebf1
1301	4.03e-29	1.30132	0.888	0.596	9.3e-25	In-7	Sorcs1
1302	1.16e-40	1.25339	0.882	0.519	2.67e-36	In-7	Htr2c
1303	1.89e-40	1.20671	0.995	0.894	4.37e-36	In-7	Kcnip4
1304	3.42e-155	1.12711	0.642	0.067	7.89e-151	In-7	Gli3
1305	1.79e-15	1.08861	0.497	0.303	4.14e-11	In-7	Ghr
1306	8.93e-60	1.05833	0.824	0.375	2.06e-55	In-7	Fras1
1307	3.32e-73	1.05225	0.989	0.853	7.67e-69	In-7	Dgkb
1308	7.31e-48	1.04988	0.561	0.171	1.69e-43	In-7	Dach1
1309	1.59e-24	1.00253	0.62	0.343	3.67e-20	In-7	Klhl1
1310	8.67e-56	0.994294	0.84	0.367	2e-51	In-7	Chsy3
1311	3.31e-67	0.982206	0.995	0.904	7.65e-63	In-7	Cdh18
1312	2.19e-53	0.979071	0.952	0.651	5.06e-49	In-7	Kcnmb2
1313	8.16e-32	0.955061	0.957	0.825	1.88e-27	In-7	B3galt1
1314	3.58e-73	0.930861	0.497	0.094	8.25e-69	In-7	Aff1
1315	1.97e-49	0.898029	0.952	0.805	4.54e-45	In-7	Ptchd4
1316	3.78e-27	0.878033	0.727	0.433	8.72e-23	In-7	Alk
1317	1.46e-47	0.865188	0.979	0.76	3.36e-43	In-7	Tshz2
1318	1.18e-50	0.865092	0.824	0.325	2.73e-46	In-7	Col25a1
1319	1.24e-73	0.824317	0.668	0.181	2.87e-69	In-7	Cpne9
1320	7.12e-35	0.809392	0.759	0.451	1.64e-30	In-7	Foxp1
1321	1.23e-51	0.80845	0.508	0.126	2.85e-47	In-7	Prkd1
1322	5.55e-26	0.80444	0.481	0.204	1.28e-21	In-7	Plpp4
1323	5.3e-09	0.797966	0.396	0.26	0.0001223	In-7	Lgr5
1324	8.22e-62	0.797915	0.995	0.998	1.9e-57	In-7	Cntnap2
1325	1.14e-37	0.789689	0.914	0.71	2.64e-33	In-7	Esrrg
1326	4.4e-34	0.780694	0.882	0.609	1.01e-29	In-7	Gm26883
1327	2.47e-19	0.774568	0.684	0.465	5.69e-15	In-7	Epha3
1328	1.35e-14	0.773029	0.385	0.194	3.12e-10	In-7	Cadps2
1329	6.45e-24	0.770179	0.834	0.612	1.49e-19	In-7	Rgs6
1330	1.39e-24	0.767356	0.471	0.199	3.2e-20	In-7	Csgalnact1
1331	9.49e-16	0.761221	0.663	0.482	2.19e-11	In-7	Fstl5
1332	1.63e-59	0.755761	0.497	0.114	3.77e-55	In-7	Foxp4
1333	3.41e-36	0.752375	0.957	0.725	7.88e-32	In-7	Thsd7b
1334	9.05e-22	0.738637	0.781	0.529	2.09e-17	In-7	Hs6st3
1335	1.47e-36	0.731495	0.909	0.581	3.39e-32	In-7	Kctd8
1336	7.39e-12	0.72744	0.647	0.467	1.7e-07	In-7	Cacna2d3
1337	7.31e-20	0.686192	0.524	0.279	1.69e-15	In-7	Shisa6
1338	4.3e-25	0.679484	0.877	0.67	9.93e-21	In-7	Chrm2
1339	9.03e-33	0.676035	0.503	0.189	2.08e-28	In-7	Tshz1
1340	1.36e-33	0.65937	0.674	0.298	3.14e-29	In-7	Cdh6
1341	7.53e-39	0.632891	0.989	0.912	1.74e-34	In-7	Dmd
1342	5.9e-22	0.630613	0.487	0.228	1.36e-17	In-7	Lhx1
1343	1.14e-23	0.628984	0.834	0.641	2.63e-19	In-7	Parp8
1344	1.63e-32	0.627873	0.396	0.113	3.76e-28	In-7	Car8
1345	3.57e-08	0.623468	0.642	0.603	0.000823662	In-7	Grik1
1346	6.81e-17	0.621806	0.877	0.6	1.57e-12	In-7	Adarb2
1347	6.36e-30	0.621702	0.877	0.618	1.47e-25	In-7	Hcn1
1348	4.43e-42	0.616636	0.326	0.063	1.02e-37	In-7	Shroom3
1349	7.87e-32	0.614045	0.62	0.284	1.82e-27	In-7	Fam184b
1350	4.92e-73	0.609961	0.369	0.047	1.14e-68	In-7	Esrrb
1351	1.24e-54	0.609621	0.989	0.985	2.85e-50	In-7	Ctnnd2
1352	1.71e-24	0.609387	0.674	0.365	3.94e-20	In-7	Arhgap24
1353	6.49e-73	0.605196	0.198	0.01	1.5e-68	In-7	Rxfp1
1354	6.88e-20	0.598511	0.717	0.477	1.59e-15	In-7	Camk4
1355	2.15e-24	0.59702	0.781	0.437	4.97e-20	In-7	Pld5
1356	5.09e-20	0.596872	0.604	0.335	1.18e-15	In-7	Neto1
1357	9.3e-26	0.592733	0.872	0.66	2.15e-21	In-7	Fam189a1
1358	4.87e-14	0.582664	0.963	0.912	1.12e-09	In-7	Rgs7
1359	1.24e-20	0.577773	0.492	0.228	2.86e-16	In-7	9330158H04Rik
1360	1.38e-24	0.575205	0.877	0.727	3.19e-20	In-7	Atp2b1
1361	9.97e-34	0.572815	1	0.99	2.3e-29	In-7	Cadm2
1362	1.57e-19	0.567067	0.717	0.479	3.63e-15	In-7	Pcdh10
1363	2.04e-19	0.564303	0.663	0.377	4.71e-15	In-7	Pard3b
1364	4.92e-07	0.557823	0.674	0.605	0.0113482	In-7	Stxbp6
1365	6.46e-17	0.555494	0.845	0.764	1.49e-12	In-7	Sgcd
1366	1.75e-11	0.553783	0.519	0.346	4.04e-07	In-7	Nell2
1367	1.65e-17	0.550709	0.92	0.816	3.8e-13	In-7	Slc35f1
1368	7.76e-21	0.545148	0.524	0.266	1.79e-16	In-7	Eml1
1369	1.33e-42	0.541362	0.385	0.089	3.07e-38	In-7	Cacna1h
1370	1.92e-23	0.534753	0.979	0.917	4.42e-19	In-7	Msi2
1371	1.1e-06	0.529346	0.775	0.676	0.0252763	In-7	Ckb
1372	2.47e-24	0.524663	0.957	0.793	5.71e-20	In-7	Khdrbs2
1373	1.01e-19	0.522617	0.856	0.704	2.33e-15	In-7	Me3
1374	7.98e-07	0.518641	0.818	0.77	0.0184176	In-7	Gabrg3
1375	2.63e-21	0.513147	0.909	0.786	6.08e-17	In-7	Thsd7a
1376	5.88e-16	0.507376	0.695	0.474	1.36e-11	In-7	Trpc5
1377	9.66e-18	0.500741	0.561	0.291	2.23e-13	In-7	Vwc2l
1378	6.75e-21	0.495849	0.332	0.115	1.56e-16	In-7	Mdga1
1379	4.45e-20	0.49509	0.882	0.78	1.03e-15	In-7	Ano4
1380	1e-06	0.492532	0.743	0.666	0.0230946	In-7	Rmst
1381	4.58e-16	0.491577	0.765	0.56	1.06e-11	In-7	Zfp608
1382	1.86e-20	0.481309	0.807	0.534	4.3e-16	In-7	Msra
1383	2.9e-13	0.480027	0.765	0.551	6.69e-09	In-7	Rtl4
1384	1.53e-06	0.479195	0.385	0.266	0.0353066	In-7	Pde1c
1385	2.25e-06	0.477477	0.738	0.742	0.051983	In-7	Mast4
1386	1.92e-14	0.475654	0.845	0.659	4.42e-10	In-7	Nell1
1387	1.26e-16	0.475529	0.802	0.587	2.91e-12	In-7	Scn9a
1388	2.43e-15	0.469728	0.877	0.74	5.6e-11	In-7	Kcnh7
1389	2.19e-15	0.466106	0.888	0.758	5.06e-11	In-7	Cntnap4
1390	6.73e-19	0.459461	0.471	0.228	1.55e-14	In-7	Lhx1os
1391	5.24e-16	0.458478	0.348	0.148	1.21e-11	In-7	Arap2
1392	2.24e-12	0.455837	0.604	0.414	5.18e-08	In-7	Cblb
1393	1.24e-18	0.455206	0.877	0.759	2.86e-14	In-7	Ank1
1394	1.55e-13	0.450722	0.749	0.579	3.57e-09	In-7	Clvs1
1395	4e-15	0.44767	0.866	0.785	9.23e-11	In-7	Cacna2d2
1396	2.38e-22	0.445096	0.759	0.415	5.49e-18	In-7	Zfp536
1397	0.000808739	0.444778	0.326	0.236	1	In-7	Pde1a
1398	2.27e-15	0.440523	0.813	0.589	5.23e-11	In-7	Slc35f4
1399	3.17e-09	0.440458	0.61	0.443	7.32e-05	In-7	Nrp1
1400	1.03e-17	0.440327	0.513	0.271	2.38e-13	In-7	Dpy19l1
1401	1.76e-13	0.439485	0.791	0.694	4.06e-09	In-7	Fut9
1402	2.92e-17	0.437577	0.604	0.349	6.74e-13	In-7	Gprin3
1403	2.78e-14	0.435955	0.684	0.494	6.42e-10	In-7	Vav3
1404	6.34e-17	0.432606	0.845	0.624	1.46e-12	In-7	Gm13629
1405	5.23e-20	0.43113	0.754	0.44	1.21e-15	In-7	Maml2
1406	6.19e-56	0.420687	0.219	0.02	1.43e-51	In-7	Cecr2
1407	2.96e-07	0.417352	0.369	0.24	0.00683375	In-7	Ptprz1
1408	5.76e-28	0.416507	1	0.997	1.33e-23	In-7	Nrxn1
1409	4.87e-38	0.414565	0.369	0.087	1.12e-33	In-7	Adgra3
1410	2.72e-08	0.409493	0.797	0.727	0.000627131	In-7	Prickle2
1411	6.82e-14	0.405062	0.781	0.643	1.57e-09	In-7	Susd4
1412	7.69e-11	0.404981	0.738	0.629	1.77e-06	In-7	Grik4
1413	1.26e-20	0.398337	0.963	0.921	2.9e-16	In-7	Mapk10
1414	3.28e-15	0.398075	0.417	0.199	7.58e-11	In-7	Glra1
1415	3.71e-07	0.396326	0.727	0.611	0.00856461	In-7	Adgrl2
1416	3e-21	0.396244	0.995	0.976	6.92e-17	In-7	Grik2
1417	1.08e-11	0.395073	0.77	0.651	2.5e-07	In-7	Atp2c1
1418	1.26e-15	0.394658	0.561	0.318	2.91e-11	In-7	Xylt1
1419	1.24e-09	0.39419	0.807	0.633	2.87e-05	In-7	Alcam
1420	6.44e-13	0.393884	0.941	0.85	1.49e-08	In-7	Tmeff2
1421	1.33e-12	0.391748	0.519	0.286	3.07e-08	In-7	Nwd2
1422	4.16e-11	0.390635	0.594	0.416	9.6e-07	In-7	Neto2
1423	5.57e-15	0.386761	0.877	0.758	1.29e-10	In-7	Dner
1424	1.1e-60	0.379887	0.198	0.014	2.54e-56	In-7	A2m
1425	2.15e-10	0.377992	0.594	0.422	4.96e-06	In-7	Rap1gap2
1426	1.82e-09	0.377446	0.765	0.677	4.2e-05	In-7	Rgs17
1427	8.4e-10	0.3771	0.583	0.422	1.94e-05	In-7	Far2
1428	2.49e-07	0.376274	0.594	0.474	0.00574954	In-7	4930570B17Rik
1429	1.31e-10	0.375419	0.936	0.858	3.03e-06	In-7	Luzp2
1430	4.92e-14	0.375081	0.283	0.114	1.14e-09	In-7	Col16a1
1431	1.81e-10	0.373489	0.412	0.24	4.18e-06	In-7	Uncx
1432	9.08e-10	0.366458	0.652	0.459	2.1e-05	In-7	Slc44a5
1433	0.000187632	0.354308	0.513	0.441	1	In-7	Kcnab1
1434	4.44e-06	0.353259	0.449	0.338	0.102568	In-7	Bmper
1435	2e-12	0.352182	0.353	0.17	4.61e-08	In-7	Mapk4
1436	5.14e-07	0.351269	0.877	0.821	0.0118547	In-7	Atp1b1
1437	1.16e-12	0.350751	0.947	0.884	2.67e-08	In-7	Ryr2
1438	1.12e-46	0.349433	0.144	0.009	2.57e-42	In-7	Tnni3
1439	1.12e-46	0.347594	0.187	0.017	2.58e-42	In-7	Grid2ip
1440	9.9e-13	0.345481	0.861	0.749	2.28e-08	In-7	Runx1t1
1441	2.94e-14	0.342604	0.93	0.857	6.77e-10	In-7	Ncoa1
1442	1.18e-11	0.340544	0.364	0.187	2.72e-07	In-7	Plcxd2
1443	1.18e-30	0.338171	0.198	0.032	2.72e-26	In-7	Bves
1444	5.22e-11	0.336893	0.717	0.492	1.2e-06	In-7	Prr16
1445	2.69e-10	0.332852	0.257	0.114	6.21e-06	In-7	St8sia6
1446	9.76e-13	0.331746	0.358	0.172	2.25e-08	In-7	Golim4
1447	1.96e-05	0.331654	0.193	0.101	0.451248	In-7	Megf11
1448	1.52e-07	0.32543	0.428	0.292	0.00349887	In-7	Gfod1
1449	2.38e-09	0.325369	0.422	0.255	5.49e-05	In-7	Gm11817
1450	9.34e-07	0.324025	0.791	0.765	0.0215485	In-7	Atrnl1
1451	1.58e-08	0.322377	0.615	0.473	0.000364829	In-7	Ppargc1a
1452	2.29e-07	0.321984	0.658	0.503	0.00529369	In-7	Ndst3
1453	5.62e-28	0.318077	0.16	0.023	1.3e-23	In-7	Pde5a
1454	8.81e-11	0.317283	0.262	0.115	2.03e-06	In-7	Pvalb
1455	9.86e-05	0.31625	0.198	0.113	1	In-7	Arhgap15
1456	1.76e-08	0.314635	0.529	0.39	0.000406953	In-7	Osbpl1a
1457	7.61e-06	0.31408	0.615	0.533	0.175723	In-7	Lin7a
1458	1.02e-05	0.312977	0.711	0.618	0.236111	In-7	Grin3a
1459	5.28e-08	0.311975	0.824	0.726	0.0012177	In-7	Enox1
1460	2.09e-07	0.310515	0.54	0.411	0.00483198	In-7	Micu1
1461	2.51e-07	0.310143	0.84	0.713	0.00578171	In-7	Fhod3
1462	1.29e-08	0.309985	0.353	0.204	0.00029816	In-7	Dnah7b
1463	1.54e-05	0.3097	0.69	0.637	0.356347	In-7	Kat6b
1464	0.000143322	0.309468	0.674	0.606	1	In-7	Elavl2
1465	7.08e-05	0.308671	0.62	0.553	1	In-7	Srrm4
1466	1.61e-07	0.303491	0.241	0.119	0.00370758	In-7	Grb14
1467	3.26e-05	0.30339	0.316	0.205	0.752197	In-7	Gm44593
1468	1.44e-05	0.303014	0.556	0.46	0.333355	In-7	Gm45881
1469	7.37e-05	0.302339	0.979	0.961	1	In-7	Opcml
1470	0.000153483	0.301295	0.658	0.581	1	In-7	Sema6d
1471	2.78e-11	0.298492	0.743	0.521	6.42e-07	In-7	Rbms1
1472	7.46e-07	0.297326	0.513	0.399	0.017211	In-7	Cntln
1473	2.7e-06	0.296693	0.444	0.332	0.0622676	In-7	Slc35f3
1474	1.47e-06	0.295716	0.743	0.653	0.0339345	In-7	Iqsec3
1475	2.21e-07	0.295437	0.866	0.833	0.00509713	In-7	Naaladl2
1476	2.69e-16	0.295014	0.529	0.249	6.2e-12	In-7	Spon1
1477	8.84e-09	0.294276	0.973	0.893	0.000203934	In-7	Nav3
1478	1.24e-06	0.294168	0.326	0.202	0.02852	In-7	Snca
1479	0.000155768	0.291869	0.578	0.514	1	In-7	Atp11b
1480	8.96e-10	0.290614	0.422	0.247	2.07e-05	In-7	Prmt8
1481	1.51e-11	0.288085	0.898	0.655	3.48e-07	In-7	Otx2os1
1482	0.00208574	0.287234	0.556	0.511	1	In-7	Ldhb
1483	1.1e-08	0.286405	0.396	0.24	0.000253366	In-7	Mitf
1484	3e-07	0.286221	0.535	0.409	0.00691346	In-7	Inpp5a
1485	5.75e-06	0.282174	0.433	0.312	0.13259	In-7	Bcan
1486	6.74e-10	0.281797	0.85	0.66	1.56e-05	In-7	Zfp385b
1487	0.000718464	0.281728	0.332	0.252	1	In-7	Htr7
1488	1.81e-09	0.280513	0.69	0.546	4.19e-05	In-7	Srcin1
1489	4.88e-07	0.279388	0.401	0.265	0.0112609	In-7	Crlf3
1490	0.000147678	0.278865	0.706	0.68	1	In-7	Hs3st5
1491	3.75e-06	0.278837	0.738	0.639	0.086572	In-7	Hs6st2
1492	1.09e-06	0.277866	0.337	0.218	0.0250427	In-7	Zadh2
1493	7.06e-09	0.277629	0.909	0.85	0.000162999	In-7	Cadm1
1494	3.39e-13	0.277056	0.257	0.097	7.83e-09	In-7	Gm12236
1495	4.64e-07	0.274424	0.342	0.201	0.0106987	In-7	A330015K06Rik
1496	1.12e-05	0.273896	0.337	0.222	0.258704	In-7	Reck
1497	2.91e-07	0.273724	0.818	0.743	0.0067228	In-7	Ahcyl2
1498	1.14e-54	1.97103	0.632	0.118	2.62e-50	In-8	9530026P05Rik
1499	2.51e-53	1.66831	0.828	0.242	5.79e-49	In-8	Maf
1500	0	1.58954	0.759	0.014	0	In-8	Gm32884
1501	2.78e-30	1.48146	1	0.604	6.41e-26	In-8	Adarb2
1502	9.37e-42	1.39752	1	0.668	2.16e-37	In-8	Ptprt
1503	5.53e-39	1.34142	1	0.815	1.28e-34	In-8	Cdh12
1504	1.11e-21	1.34124	0.747	0.389	2.55e-17	In-8	Fras1
1505	9.77e-34	1.33082	0.954	0.748	2.25e-29	In-8	Tenm1
1506	3.61e-40	1.31381	0.977	0.584	8.33e-36	In-8	Rbms3
1507	7.53e-27	1.25176	0.586	0.203	1.74e-22	In-8	Ccdc88c
1508	7.13e-45	1.18656	0.839	0.289	1.65e-40	In-8	2700069I18Rik
1509	9.3e-20	1.16054	0.793	0.542	2.14e-15	In-8	Trhde
1510	6.42e-32	1.13368	0.644	0.199	1.48e-27	In-8	Gbe1
1511	8.23e-22	1.10259	0.862	0.662	1.9e-17	In-8	Kcnmb2
1512	4.51e-18	1.05227	1	0.947	1.04e-13	In-8	Galntl6
1513	7.55e-37	1.03678	1	0.752	1.74e-32	In-8	Zfhx3
1514	6.5e-13	0.930798	0.782	0.581	1.5e-08	In-8	Sema6d
1515	6.82e-29	0.921192	0.966	0.701	1.57e-24	In-8	Zfhx4
1516	8.38e-28	0.919138	0.977	0.823	1.93e-23	In-8	Kcnq3
1517	1.78e-26	0.891346	1	0.99	4.11e-22	In-8	Cadm2
1518	7.72e-14	0.882842	0.885	0.728	1.78e-09	In-8	Gm26905
1519	1.81e-25	0.878403	0.828	0.488	4.18e-21	In-8	Nrip1
1520	1.71e-14	0.876858	0.885	0.651	3.96e-10	In-8	Edil3
1521	5.36e-28	0.874666	1	0.882	1.24e-23	In-8	Zfpm2
1522	9.54e-09	0.863155	0.724	0.609	0.00022004	In-8	Sema6a
1523	3.46e-34	0.85571	1	0.967	7.99e-30	In-8	Sgcz
1524	1.42e-34	0.855178	1	0.974	3.27e-30	In-8	Pcdh9
1525	2.66e-19	0.846	0.655	0.32	6.13e-15	In-8	Adamts17
1526	1.05e-18	0.812427	0.977	0.927	2.42e-14	In-8	Park2
1527	3.27e-25	0.808681	0.46	0.12	7.54e-21	In-8	Hpcal1
1528	1.35e-26	0.80805	1	0.922	3.13e-22	In-8	Celf4
1529	7.52e-13	0.805587	0.77	0.453	1.74e-08	In-8	Fam19a1
1530	8.28e-05	0.804517	0.54	0.475	1	In-8	Epha3
1531	3.86e-27	0.804274	0.667	0.243	8.91e-23	In-8	Gm47757
1532	2.25e-27	0.782776	0.471	0.115	5.18e-23	In-8	Trpc7
1533	2.99e-96	0.777823	0.287	0.009	6.91e-92	In-8	CT010465.1
1534	1.71e-17	0.771268	0.862	0.672	3.94e-13	In-8	Bach2
1535	3.01e-21	0.769055	0.828	0.525	6.95e-17	In-8	Ankrd44
1536	3.76e-31	0.767105	0.494	0.114	8.67e-27	In-8	Syndig1l
1537	3.54e-23	0.764922	0.494	0.149	8.17e-19	In-8	Dock1
1538	2.75e-12	0.76392	0.839	0.636	6.35e-08	In-8	Cdh8
1539	8.2e-16	0.755668	0.759	0.485	1.89e-11	In-8	Pcdh10
1540	3.29e-22	0.754916	0.609	0.234	7.6e-18	In-8	Sox14
1541	3.66e-17	0.746838	0.759	0.458	8.46e-13	In-8	Gm45881
1542	3.83e-18	0.743781	0.805	0.51	8.84e-14	In-8	Mboat2
1543	1.38e-30	0.725457	1	0.988	3.18e-26	In-8	Ptprd
1544	8.2e-08	0.714689	0.724	0.502	0.00189248	In-8	Il1rapl2
1545	1.71e-26	0.713642	0.379	0.075	3.94e-22	In-8	Arhgap31
1546	1.99e-20	0.704801	0.828	0.543	4.6e-16	In-8	Arhgap20
1547	5.54e-20	0.69636	1	0.781	1.28e-15	In-8	Kirrel3
1548	5.29e-16	0.694056	0.552	0.225	1.22e-11	In-8	Igf1
1549	6.47e-19	0.684191	0.966	0.719	1.49e-14	In-8	Car10
1550	1.56e-33	0.6751	0.299	0.038	3.6e-29	In-8	Gm36756
1551	3.34e-16	0.6681	0.253	0.054	7.71e-12	In-8	Samsn1
1552	2.07e-07	0.662671	0.586	0.428	0.00477261	In-8	Thsd4
1553	4.54e-20	0.661953	1	0.997	1.05e-15	In-8	Cntnap2
1554	1.79e-32	0.656789	0.23	0.022	4.13e-28	In-8	Dkk2
1555	3.35e-05	0.653121	1	0.997	0.77232	In-8	Lsamp
1556	8.99e-08	0.651892	0.632	0.479	0.00207527	In-8	Pex5l
1557	3.99e-06	0.645656	0.977	0.989	0.0919904	In-8	Macrod2
1558	4.52e-18	0.645291	0.954	0.766	1.04e-13	In-8	Pcsk2
1559	3.08e-15	0.639818	0.954	0.705	7.12e-11	In-8	Spock1
1560	3.99e-18	0.626977	0.989	0.854	9.2e-14	In-8	Ntrk3
1561	7.11e-11	0.624955	0.897	0.763	1.64e-06	In-8	Kcnip1
1562	1.76e-22	0.616749	0.276	0.047	4.07e-18	In-8	Chrna6
1563	1.71e-07	0.588654	0.782	0.639	0.00393907	In-8	Alcam
1564	5.38e-13	0.584858	0.701	0.41	1.24e-08	In-8	Syt9
1565	0.000325242	0.577147	0.46	0.35	1	In-8	Dpf3
1566	1.03e-11	0.575614	0.437	0.175	2.37e-07	In-8	Nos1
1567	2.53e-20	0.566479	0.483	0.149	5.85e-16	In-8	Rgs3
1568	3.7e-09	0.546633	0.713	0.48	8.53e-05	In-8	Fgf13
1569	9.61e-07	0.540823	0.483	0.282	0.0221802	In-8	Baiap3
1570	4.46e-08	0.537821	0.655	0.478	0.00102866	In-8	Gm16083
1571	8.26e-07	0.534418	0.713	0.601	0.0190621	In-8	Tnrc18
1572	2.18e-10	0.531042	1	0.949	5.02e-06	In-8	Nkain2
1573	6.36e-11	0.528254	0.885	0.742	1.47e-06	In-8	Epb41
1574	2.07e-07	0.525216	0.506	0.316	0.0047699	In-8	BC030499
1575	2.17e-32	0.524058	0.368	0.058	5e-28	In-8	Cdhr1
1576	8.58e-05	0.51619	0.529	0.375	1	In-8	A330008L17Rik
1577	8.94e-10	0.515445	0.931	0.847	2.06e-05	In-8	Specc1
1578	5.91e-06	0.514359	0.851	0.785	0.136449	In-8	Kcnc2
1579	4.39e-05	0.513954	0.356	0.223	1	In-8	Rarb
1580	1.01e-07	0.512529	0.701	0.587	0.002322	In-8	Cers4
1581	1.72e-08	0.510443	0.333	0.137	0.000397861	In-8	Gfra1
1582	2.06e-11	0.505494	0.931	0.904	4.74e-07	In-8	Magi1
1583	1.27e-25	0.491568	0.264	0.038	2.93e-21	In-8	Pcdh18
1584	3.83e-05	0.484027	0.448	0.318	0.883536	In-8	Tmem164
1585	1.36e-06	0.482601	0.425	0.254	0.0314791	In-8	4930444A19Rik
1586	5.55e-12	0.473795	1	0.961	1.28e-07	In-8	Lrrc4c
1587	4.68e-08	0.472165	0.839	0.728	0.00107992	In-8	Enox1
1588	4.62e-07	0.465674	0.425	0.239	0.0106688	In-8	Tmem255a
1589	5.43e-07	0.45697	0.77	0.638	0.0125258	In-8	Maml3
1590	2.22e-19	0.455395	0.149	0.016	5.12e-15	In-8	Gna14
1591	2.19e-31	0.451111	0.241	0.026	5.06e-27	In-8	Drd3
1592	1.5e-14	0.449943	0.322	0.091	3.45e-10	In-8	Fam196a
1593	7.09e-08	0.44849	0.621	0.427	0.00163607	In-8	St6gal2
1594	1.44e-30	0.440288	0.207	0.019	3.32e-26	In-8	Vit
1595	6.38e-10	0.439667	0.552	0.284	1.47e-05	In-8	Pax7
1596	5.46e-06	0.436189	0.77	0.668	0.126101	In-8	Ly6h
1597	1.06e-09	0.435768	0.943	0.914	2.44e-05	In-8	Rgs7
1598	3.67e-06	0.434913	0.575	0.43	0.0846374	In-8	Kcnb1
1599	0.00101751	0.433973	0.437	0.343	1	In-8	Galnt7
1600	5.11e-15	0.433648	1	0.994	1.18e-10	In-8	Rora
1601	1.85e-07	0.429978	0.563	0.366	0.00425866	In-8	Arhgap6
1602	4.36e-07	0.426127	0.402	0.213	0.010067	In-8	Crtac1
1603	4.7e-07	0.423313	0.943	0.895	0.0108489	In-8	Kcnb2
1604	1.62e-17	0.421543	0.276	0.06	3.73e-13	In-8	Tmod1
1605	4.06e-10	0.421239	0.954	0.823	9.37e-06	In-8	Plekha5
1606	0.00015025	0.418689	0.793	0.789	1	In-8	Csmd2
1607	4.22e-06	0.41598	0.529	0.383	0.0972832	In-8	Tead1
1608	6.33e-09	0.415129	0.862	0.741	0.000146118	In-8	Aff3
1609	1.88e-11	0.414861	0.966	0.919	4.34e-07	In-8	Msi2
1610	2.54e-05	0.41455	0.241	0.111	0.58707	In-8	Fam163a
1611	9.55e-07	0.413192	0.264	0.112	0.0220424	In-8	Nkd2
1612	1.61e-08	0.409975	0.77	0.588	0.000370767	In-8	Zmiz1
1613	0.00255582	0.405305	0.529	0.452	1	In-8	Ubc
1614	1.17e-05	0.40127	0.276	0.135	0.269084	In-8	1500009L16Rik
1615	0.000435303	0.400112	0.586	0.552	1	In-8	Fnip1
1616	6.79e-12	0.399645	0.31	0.099	1.57e-07	In-8	1810041L15Rik
1617	1.89e-17	0.398737	0.264	0.054	4.35e-13	In-8	Clic4
1618	7.95e-23	0.396952	0.172	0.018	1.83e-18	In-8	Adamts9
1619	2.86e-05	0.396031	0.713	0.615	0.66085	In-8	Lrfn2
1620	1.74e-23	0.390326	0.207	0.026	4.02e-19	In-8	4930488N15Rik
1621	4.54e-05	0.387943	0.333	0.185	1	In-8	Tmem200a
1622	0.000143473	0.384147	0.621	0.488	1	In-8	Tmem132b
1623	2.96e-05	0.3824	0.655	0.582	0.682837	In-8	Bsn
1624	3.91e-08	0.382209	0.299	0.118	0.000903036	In-8	4930473D10Rik
1625	9.96e-06	0.377558	0.448	0.281	0.229807	In-8	Kcnh5
1626	6.88e-07	0.377236	0.747	0.516	0.0158706	In-8	Gm28905
1627	1.45e-05	0.37655	0.356	0.196	0.33397	In-8	Lncbate1
1628	2.97e-06	0.376248	0.356	0.187	0.0685941	In-8	Rgs9
1629	2.6e-14	0.37492	0.368	0.104	6e-10	In-8	Gabrr2
1630	0.00341103	0.3737	0.276	0.179	1	In-8	Sox4
1631	0.000181323	0.373601	0.644	0.545	1	In-8	Map7
1632	0.00223895	0.372853	0.471	0.359	1	In-8	Tmcc3
1633	0.000529183	0.367243	0.621	0.501	1	In-8	Prr16
1634	1.6e-06	0.366762	0.92	0.814	0.0368359	In-8	Kctd16
1635	0.001588	0.363657	0.276	0.169	1	In-8	4930419G24Rik
1636	0.000936029	0.363406	0.437	0.33	1	In-8	Hlf
1637	0.00990442	0.361825	0.322	0.238	1	In-8	Macrod2os1
1638	7.14e-06	0.360111	0.471	0.308	0.164797	In-8	Asic1
1639	4.61e-08	0.359611	0.276	0.106	0.00106317	In-8	Pnoc
1640	2.02e-06	0.358385	0.851	0.726	0.0467132	In-8	Adcy8
1641	1.59e-06	0.358384	0.207	0.076	0.0366792	In-8	Cbln4
1642	2.69e-05	0.356902	0.218	0.095	0.619616	In-8	Id2
1643	3.93e-24	0.356543	0.23	0.031	9.06e-20	In-8	Pygm
1644	1.26e-14	0.349271	0.207	0.04	2.91e-10	In-8	Ankrd33b
1645	0.00152586	0.343672	0.379	0.274	1	In-8	Pou2f2
1646	1.03e-08	0.343441	0.23	0.071	0.000238016	In-8	Col8a1
1647	4.26e-05	0.343411	0.506	0.354	0.982437	In-8	Adcy1
1648	4.99e-05	0.342572	0.54	0.362	1	In-8	Tmem132c
1649	3.97e-08	0.342359	0.977	0.952	0.000916548	In-8	Unc80
1650	5.04e-11	0.338787	0.333	0.114	1.16e-06	In-8	Chrna3
1651	9.11e-05	0.33655	0.793	0.722	1	In-8	Klhl29
1652	0.000158691	0.335189	0.448	0.329	1	In-8	Zfhx2
1653	0.00190437	0.334375	0.391	0.298	1	In-8	Kiz
1654	7.18e-07	0.327816	0.954	0.925	0.0165589	In-8	Plcb4
1655	0.00666109	0.327696	0.345	0.254	1	In-8	Cnr1
1656	1.81e-09	0.327522	0.218	0.061	4.18e-05	In-8	AC163354.1
1657	0.000288399	0.326343	0.483	0.382	1	In-8	Cdc42se2
1658	0.00166552	0.324316	0.299	0.182	1	In-8	Col19a1
1659	0.00607511	0.323757	0.31	0.214	1	In-8	Glra3
1660	5.4e-07	0.321757	0.828	0.649	0.0124528	In-8	Dgkh
1661	0.00161836	0.32059	0.839	0.812	1	In-8	Ptchd4
1662	0.000440581	0.318645	0.575	0.468	1	In-8	Plp1
1663	8.47e-06	0.318236	0.759	0.666	0.195355	In-8	Slc6a1
1664	0.000188506	0.316546	0.241	0.124	1	In-8	Ntn4
1665	0.000144166	0.315666	0.678	0.545	1	In-8	Itpr1
1666	1.51e-07	0.314718	0.977	0.988	0.00348692	In-8	Cadps
1667	0.00555063	0.314328	0.563	0.501	1	In-8	Eif1
1668	2.13e-05	0.311122	0.264	0.119	0.491801	In-8	Fibcd1
1669	0.00820249	0.311029	0.621	0.551	1	In-8	Eef1a1
1670	1.6e-07	0.310542	0.977	0.826	0.00369348	In-8	Inpp4b
1671	0.00767653	0.30895	0.31	0.229	1	In-8	Pacsin2
1672	1.9e-07	0.308172	0.943	0.946	0.00439549	In-8	Fgfr2
1673	0.000121007	0.307604	0.529	0.394	1	In-8	Zbtb4
1674	0.000155048	0.306473	0.851	0.784	1	In-8	Syn2
1675	3.98e-07	0.303915	0.908	0.677	0.00918827	In-8	Chrm3
1676	6.34e-06	0.30284	0.276	0.128	0.146329	In-8	Adora1
1677	1.08e-07	0.302442	0.23	0.078	0.00248633	In-8	Atp10a
1678	0.000481499	0.302061	0.69	0.633	1	In-8	Sh3kbp1
1679	0.0043764	0.297683	0.322	0.231	1	In-8	Sub1
1680	3.15e-05	0.295978	0.299	0.152	0.725796	In-8	Mme
1681	0.000303062	0.293766	0.241	0.126	1	In-8	Gm27153
1682	1.93e-05	0.293471	0.897	0.818	0.445994	In-8	Rgs7bp
1683	2.59e-05	0.292224	0.23	0.097	0.598717	In-8	Lrp4
1684	4.05e-12	0.291722	0.218	0.051	9.34e-08	In-8	Jam2
1685	0.00310175	0.291111	0.483	0.417	1	In-8	Pitpnm3
1686	4.62e-06	0.290584	1	0.975	0.106543	In-8	Csmd1
1687	0.000801251	0.290221	0.828	0.793	1	In-8	Mir124-2hg
1688	0.00272143	0.289901	0.54	0.451	1	In-8	Gm21798
1689	0.000141553	0.289892	0.322	0.182	1	In-8	Serpine2
1690	1.06e-05	0.28904	0.897	0.844	0.245487	In-8	Ccdc85a
1691	0.00049794	0.285579	0.966	0.94	1	In-8	Fat3
1692	0.00925981	0.282705	0.241	0.161	1	In-8	Gm28750
1693	0.00369538	0.281181	0.448	0.358	1	In-8	Ypel2
1694	3.72e-19	0.279594	0.138	0.014	8.59e-15	In-8	Gm15655
1695	0.000173296	0.278035	0.736	0.607	1	In-8	Elavl2
1696	4.51e-05	0.277822	0.943	0.913	1	In-8	Gpr158
1697	0.0036319	0.277497	0.552	0.478	1	In-8	Ppargc1a
