# Supplementary material for: Transcriptomic encoding of sensorimotor transformation in the midbrain
Source: eLife. 2021 Jul 28;10:e69825. doi: 10.7554/eLife.69825 (PMC8341986; doi:10.7554/eLife.69825)
Supplement: Supplementary file 3. [file elife-69825-supp3.xlsx]

## Sheet: mouse_smart_seq_sample_info
Table S3. Mouse sample information for Patch-seq of neurons from superior colliculus (SC)
	LPTN-projecting neurons	ZI-projecting neurons	Sum
mouse line	vGlut2-ires-Cre	vGlut2-ires-Cre
age	3 months	3 months
gender	Male	Male
sequenced cells	28 (from 4 mice)	50 (from 3 mice)	78
cells passed quality control	21	39	60
