# Supplementary material for: Transcriptomic encoding of sensorimotor transformation in the midbrain
Source: eLife. 2021 Jul 28;10:e69825. doi: 10.7554/eLife.69825 (PMC8341986; doi:10.7554/eLife.69825)
Supplement: Supplementary file 4. [file elife-69825-supp4.xlsx]

## Sheet: smartseq_heatmap_deg_table_s4
Table S4: Differentially expressed genes between ZI- and LPTN-projecting neurons in SC
	myAUC	avg_diff	power	avg_logFC	pct.1	pct.2	cluster	gene
Pitx2	0.87	1.25679	0.74	1.25679	0.769	0.095	InG	Pitx2
Tubb4b	0.89	0.880565	0.78	0.880565	0.949	0.952	InG	Tubb4b
Celf4	0.879	0.762958	0.758	0.762958	1	1	InG	Celf4
Add2	0.89	0.881538	0.78	0.881538	0.897	0.286	InG	Add2
Clstn3	0.867	0.932066	0.734	0.932066	0.923	0.429	InG	Clstn3
Pdhb	0.849	0.910428	0.698	0.910428	0.974	0.952	InG	Pdhb
Marcksl1	0.844	0.88672	0.688	0.88672	0.872	0.81	InG	Marcksl1
Cd81	0.836	0.754497	0.672	0.754497	1	1	InG	Cd81
Pld3	0.827	0.89501	0.654	0.89501	1	1	InG	Pld3
Paf1	0.755	0.88878	0.51	0.88878	0.846	0.857	InG	Paf1
Eno1	0.797	0.365708	0.594	0.365708	1	1	InG	Eno1
Fxyd6	0.816	0.911284	0.632	0.911284	0.795	0.286	InG	Fxyd6
Prmt2	0.81	0.753219	0.62	0.753219	0.923	0.905	InG	Prmt2
Alg2	0.79	0.75303	0.58	0.75303	0.923	1	InG	Alg2
Pdxk	0.778	0.772132	0.556	0.772132	1	0.952	InG	Pdxk
Vwc2	0.778	0.489113	0.556	0.489113	0.692	0.238	InG	Vwc2
Kcnc4	0.773	1.13436	0.546	1.13436	0.897	0.81	InG	Kcnc4
Gnaz	0.77	0.803203	0.54	0.803203	0.821	0.857	InG	Gnaz
Atn1	0.768	0.772673	0.536	0.772673	0.923	0.905	InG	Atn1
Zbtb17	0.767	0.788294	0.534	0.788294	0.667	0.143	InG	Zbtb17
Strip1	0.767	0.739289	0.534	0.739289	0.744	0.238	InG	Strip1
Calb2	0.759	1.46115	0.518	1.46115	0.846	0.762	InG	Calb2
Srxn1	0.756	0.72683	0.512	0.72683	0.846	0.857	InG	Srxn1
Cdh8	0.824	0.609786	0.648	0.609786	0.846	0.238	InG	Cdh8
Pfkl	0.744	0.79526	0.488	0.79526	0.872	1	InG	Pfkl
Syt13	0.809	0.827692	0.618	0.827692	0.923	0.857	InG	Syt13
Tmeff2	0.73	0.735828	0.46	0.735828	0.872	0.905	InG	Tmeff2
Dusp1	0.725	1.15849	0.45	1.15849	0.872	0.952	InG	Dusp1
Gpx3	0.701	1.25942	0.402	1.25942	0.744	0.667	InG	Gpx3
Kcna3	0.897	0.481626	0.794	0.481626	0.795	0	InG	Kcna3
Arf4	0.863	0.624284	0.726	0.624284	0.949	0.762	InG	Arf4
Bex2	0.862	0.468484	0.724	0.468484	1	1	InG	Bex2
Smu1	0.839	0.451846	0.678	0.451846	0.846	0.19	InG	Smu1
Clstn2	0.753	0.376435	0.506	0.376435	0.615	0.143	InG	Clstn2
Zcchc18	0.807	0.410339	0.614	0.410339	1	1	InG	Zcchc18
Celf5	0.806	0.652018	0.612	0.652018	0.795	0.333	InG	Celf5
Hspa5	0.806	0.545369	0.612	0.545369	1	1	InG	Hspa5
Rcn2	0.805	0.650853	0.61	0.650853	0.949	0.952	InG	Rcn2
Pgs1	0.803	0.617317	0.606	0.617317	0.795	0.286	InG	Pgs1
Tusc2	0.801	0.635766	0.602	0.635766	0.872	0.81	InG	Tusc2
Psmd12	0.801	0.614646	0.602	0.614646	0.949	1	InG	Psmd12
Appbp2	0.801	0.578479	0.602	0.578479	0.897	0.524	InG	Appbp2
Nap1l5	0.801	0.342682	0.602	0.342682	1	1	InG	Nap1l5
Asphd2	0.792	0.674722	0.584	0.674722	0.769	0.238	InG	Asphd2
Pnpo	0.797	0.59335	0.594	0.59335	0.795	0.333	InG	Pnpo
Stub1	0.797	0.489406	0.594	0.489406	0.949	0.905	InG	Stub1
Fstl5	0.702	0.396338	0.404	0.396338	0.692	0.333	InG	Fstl5
Sec23b	0.795	0.614121	0.59	0.614121	0.744	0.286	InG	Sec23b
Svop	0.795	0.528659	0.59	0.528659	0.846	0.286	InG	Svop
Gdi1	0.79	0.387436	0.58	0.387436	1	1	InG	Gdi1
Hpcal1	0.969	1.17117	0.938	1.17117	1	0.667	OP	Hpcal1
Pnkd	0.924	0.80755	0.848	0.80755	1	0.949	OP	Pnkd
Aard	0.822	0.351186	0.644	0.351186	0.714	0.154	OP	Aard
Cbln2	0.806	0.967225	0.612	0.967225	0.714	0.231	OP	Cbln2
Tle1	0.841	0.34931	0.682	0.34931	0.762	0.256	OP	Tle1
Csmd1	0.891	0.87614	0.782	0.87614	0.952	0.718	OP	Csmd1
Cdr1	0.882	0.812338	0.764	0.812338	1	1	OP	Cdr1
Tcf7l2	0.873	1.62066	0.746	1.62066	0.905	0.513	OP	Tcf7l2
Cacng5	0.872	1.38805	0.744	1.38805	0.762	0.051	OP	Cacng5
Mtmr4	0.868	0.89643	0.736	0.89643	0.952	0.538	OP	Mtmr4
Grm8	0.853	0.426106	0.706	0.426106	0.81	0.205	OP	Grm8
Thap2	0.85	1.03647	0.7	1.03647	0.81	0.436	OP	Thap2
Fam76b	0.85	0.881101	0.7	0.881101	0.81	0.333	OP	Fam76b
Lamb1	0.849	0.974422	0.698	0.974422	0.714	0.051	OP	Lamb1
Dhx8	0.848	0.993034	0.696	0.993034	0.857	0.462	OP	Dhx8
Tcf12	0.853	0.465524	0.706	0.465524	0.905	0.462	OP	Tcf12
Fgf13	0.845	0.616705	0.69	0.616705	0.905	0.692	OP	Fgf13
Mpped1	0.824	0.798283	0.648	0.798283	0.857	0.462	OP	Mpped1
Zmat3	0.815	0.880606	0.63	0.880606	0.952	0.667	OP	Zmat3
Zfp385b	0.905	0.493557	0.81	0.493557	0.905	0.205	OP	Zfp385b
Nxph4	0.805	0.857858	0.61	0.857858	0.714	0.103	OP	Nxph4
Rtl1	0.803	1.02054	0.606	1.02054	0.762	0.308	OP	Rtl1
Zfp523	0.801	0.860882	0.602	0.860882	0.857	0.59	OP	Zfp523
Pcnx	0.8	0.812728	0.6	0.812728	0.952	0.641	OP	Pcnx
Pik3r4	0.794	0.939569	0.588	0.939569	0.952	0.59	OP	Pik3r4
Stam	0.794	0.928756	0.588	0.928756	0.952	0.667	OP	Stam
Dgkh	0.787	0.308974	0.574	0.308974	0.762	0.359	OP	Dgkh
Lmln	0.778	0.855785	0.556	0.855785	0.667	0.282	OP	Lmln
Iqsec2	0.773	0.914798	0.546	0.914798	0.81	0.538	OP	Iqsec2
Grid1	0.756	0.8119	0.512	0.8119	0.714	0.41	OP	Grid1
St8sia6	0.741	0.626586	0.482	0.626586	0.619	0.333	OP	St8sia6
Akap1	0.842	0.570144	0.684	0.570144	0.81	0.256	OP	Akap1
Nudt3	0.701	0.831313	0.402	0.831313	1	1	OP	Nudt3
Mllt6	0.897	0.564868	0.794	0.564868	0.905	0.333	OP	Mllt6
Reps1	0.896	0.662209	0.792	0.662209	0.905	0.256	OP	Reps1
Nfat5	0.891	0.376767	0.782	0.376767	0.952	0.641	OP	Nfat5
Nyap2	0.89	0.784229	0.78	0.784229	0.905	0.333	OP	Nyap2
Rph3a	0.889	1.21684	0.778	1.21684	1	0.846	OP	Rph3a
Meis2	0.841	0.585724	0.682	0.585724	0.857	0.359	OP	Meis2
Pcsk2	0.841	0.521971	0.682	0.521971	1	0.846	OP	Pcsk2
Arpp21	0.718	0.296706	0.436	0.296706	0.952	0.949	OP	Arpp21
Flrt3	0.833	0.482919	0.666	0.482919	0.905	0.462	OP	Flrt3
Tshz1	0.874	0.306071	0.748	0.306071	0.857	0.231	OP	Tshz1
Stag1	0.871	0.507346	0.742	0.507346	1	0.769	OP	Stag1
Klhl23	0.839	0.304042	0.678	0.304042	0.857	0.359	OP	Klhl23
Rasgrp2	0.862	0.468398	0.724	0.468398	1	0.564	OP	Rasgrp2
Dgke	0.861	0.791232	0.722	0.791232	0.905	0.615	OP	Dgke
Hipk4	0.861	0.508453	0.722	0.508453	0.857	0.231	OP	Hipk4
Zcrb1	0.86	0.314288	0.72	0.314288	1	0.949	OP	Zcrb1
Phc2	0.86	0.299269	0.72	0.299269	0.905	0.333	OP	Phc2
