# Supplementary material for: Transcriptomic encoding of sensorimotor transformation in the midbrain
Source: eLife. 2021 Jul 28;10:e69825. doi: 10.7554/eLife.69825 (PMC8341986; doi:10.7554/eLife.69825)
Supplement: Supplementary file 5. [file elife-69825-supp5.xlsx]

## Sheet: DEGs_between_Ex3_and_Ex6
Table S5: Differentially expressed genes between excitatory neuron subtype Ex-3 and Ex-6
	p_val	avg_logFC	pct.1	pct.2	p_val_adj	cluster	gene
Tcf7l2	4.58052e-63	1.41375	0.971	0.465	1.057e-58	Ex-3	Tcf7l2
Dcc	1.86614e-56	1.49709	0.982	0.594	4.30631e-52	Ex-3	Dcc
Zfhx3	1.5954e-55	1.09027	0.994	0.91	3.68155e-51	Ex-3	Zfhx3
Lhfpl3	7.67214e-50	1.21422	0.99	0.697	1.77042e-45	Ex-3	Lhfpl3
Gabrg3	9.67665e-48	1.45221	0.877	0.303	2.23298e-43	Ex-3	Gabrg3
Gria4	1.25025e-44	0.823464	0.994	0.871	2.88507e-40	Ex-3	Gria4
Ldb2	1.65606e-44	1.21385	0.893	0.374	3.82153e-40	Ex-3	Ldb2
Plxna4	4.94414e-44	0.938355	0.934	0.458	1.14091e-39	Ex-3	Plxna4
Meg3	1.54912e-43	0.510392	1	1	3.57475e-39	Ex-3	Meg3
Pcdh15	2.29019e-43	1.37227	0.945	0.671	5.28485e-39	Ex-3	Pcdh15
Frmd5	1.29179e-42	1.05925	0.889	0.374	2.98093e-38	Ex-3	Frmd5
Cdh18	1.42289e-39	1.09221	0.971	0.794	3.28347e-35	Ex-3	Cdh18
Dscam	1.12272e-38	0.682601	0.994	0.916	2.59079e-34	Ex-3	Dscam
Sphkap	2.05289e-38	1.25721	0.749	0.174	4.73724e-34	Ex-3	Sphkap
Hs6st3	2.07953e-37	1.59546	0.864	0.484	4.79873e-33	Ex-3	Hs6st3
Galnt13	3.54716e-37	0.815967	0.99	0.858	8.18543e-33	Ex-3	Galnt13
Oxr1	3.04585e-36	0.887166	0.965	0.716	7.02861e-32	Ex-3	Oxr1
Cntn4	1.35175e-35	1.05085	0.982	0.768	3.1193e-31	Ex-3	Cntn4
Hdac9	3.09734e-34	0.977046	0.889	0.458	7.14742e-30	Ex-3	Hdac9
Cdh10	4.13529e-34	0.94306	0.869	0.381	9.5426e-30	Ex-3	Cdh10
Rasgrf1	1.89621e-33	0.769845	0.953	0.6	4.3757e-29	Ex-3	Rasgrf1
Gm15398	4.63594e-33	1.01894	0.803	0.323	1.06979e-28	Ex-3	Gm15398
Epha6	3.27123e-32	0.937726	0.932	0.497	7.54868e-28	Ex-3	Epha6
Gabra1	6.64775e-32	0.781219	0.811	0.355	1.53403e-27	Ex-3	Gabra1
Ext1	7.53264e-31	0.949127	0.873	0.535	1.73823e-26	Ex-3	Ext1
Tfap2d	8.01598e-31	0.973823	0.637	0.103	1.84977e-26	Ex-3	Tfap2d
Car10	3.20557e-30	0.906748	0.943	0.626	7.39717e-26	Ex-3	Car10
Robo1	5.77945e-30	0.902672	0.959	0.806	1.33367e-25	Ex-3	Robo1
Carmil1	2.71973e-29	0.681846	0.793	0.316	6.27605e-25	Ex-3	Carmil1
Tmtc2	4.63004e-29	0.855936	0.616	0.077	1.06843e-24	Ex-3	Tmtc2
Dgkb	7.96091e-29	0.966924	0.926	0.671	1.83706e-24	Ex-3	Dgkb
Negr1	9.88912e-29	0.765652	0.994	0.871	2.28201e-24	Ex-3	Negr1
Nlgn1	1.77325e-28	0.600601	0.998	0.994	4.09196e-24	Ex-3	Nlgn1
Csmd3	2.05197e-28	0.666211	0.988	0.935	4.73513e-24	Ex-3	Csmd3
Aff3	3.46865e-28	0.673193	0.926	0.71	8.00425e-24	Ex-3	Aff3
Sorcs1	5.28701e-27	1.17807	0.745	0.31	1.22003e-22	Ex-3	Sorcs1
Cntn5	7.46236e-27	1.17132	0.899	0.697	1.72202e-22	Ex-3	Cntn5
Znrf1	1.33392e-26	0.607346	0.754	0.31	3.07816e-22	Ex-3	Znrf1
Bach2	2.02365e-26	0.66965	0.69	0.194	4.66977e-22	Ex-3	Bach2
Cdh9	2.0343e-26	1.01483	0.587	0.103	4.69436e-22	Ex-3	Cdh9
Esrrg	2.59012e-26	0.857636	0.885	0.594	5.97696e-22	Ex-3	Esrrg
Mtus2	3.2881e-26	0.62251	0.93	0.69	7.58762e-22	Ex-3	Mtus2
Astn2	5.92447e-26	0.857746	0.914	0.8	1.36713e-21	Ex-3	Astn2
Dapk1	8.37519e-26	0.670921	0.71	0.226	1.93266e-21	Ex-3	Dapk1
Pde10a	1.08349e-25	0.828191	0.965	0.852	2.50027e-21	Ex-3	Pde10a
Kcnj3	1.12979e-25	0.70188	0.918	0.652	2.60711e-21	Ex-3	Kcnj3
Thrb	3.39604e-25	0.764881	0.749	0.303	7.83669e-21	Ex-3	Thrb
Rasal2	3.86073e-25	0.64661	0.922	0.768	8.90902e-21	Ex-3	Rasal2
Arl15	6.82471e-25	0.820655	0.914	0.723	1.57487e-20	Ex-3	Arl15
Celf2	8.13749e-25	0.589808	0.998	0.987	1.87781e-20	Ex-3	Celf2
Nebl	9.00636e-25	0.603013	0.926	0.697	2.07831e-20	Ex-3	Nebl
Unc5d	9.70567e-25	0.824266	0.93	0.665	2.23968e-20	Ex-3	Unc5d
Htr2c	1.27925e-24	1.33879	0.643	0.2	2.95201e-20	Ex-3	Htr2c
Brinp3	1.31764e-24	0.79604	0.928	0.71	3.04058e-20	Ex-3	Brinp3
Zfhx4	2.07111e-24	0.705228	0.91	0.671	4.77928e-20	Ex-3	Zfhx4
Zfp804a	2.36136e-24	0.808568	0.85	0.555	5.44908e-20	Ex-3	Zfp804a
Stac2	2.74094e-24	0.703456	0.487	0.026	6.325e-20	Ex-3	Stac2
Cdk14	1.02845e-23	0.643165	0.924	0.632	2.37324e-19	Ex-3	Cdk14
Ndst4	1.47749e-23	0.945493	0.507	0.045	3.40946e-19	Ex-3	Ndst4
Rsrc1	2.92383e-23	0.579443	0.83	0.529	6.74703e-19	Ex-3	Rsrc1
Cntn6	2.94538e-23	0.707076	0.922	0.639	6.79675e-19	Ex-3	Cntn6
Anks1b	4.55033e-23	0.50671	0.998	0.974	1.05003e-18	Ex-3	Anks1b
Kcnab1	4.58745e-23	0.967177	0.639	0.252	1.0586e-18	Ex-3	Kcnab1
Ndst3	6.39281e-23	0.791927	0.725	0.31	1.4752e-18	Ex-3	Ndst3
Unc13c	6.95471e-23	0.89459	0.807	0.432	1.60487e-18	Ex-3	Unc13c
Ppp2r2b	9.62605e-23	0.550976	0.986	0.955	2.22131e-18	Ex-3	Ppp2r2b
Klf12	1.20759e-22	0.609505	0.934	0.69	2.78663e-18	Ex-3	Klf12
Elavl2	1.29349e-22	0.626511	0.698	0.245	2.98485e-18	Ex-3	Elavl2
Fam189a1	3.24847e-22	0.59527	0.727	0.29	7.49617e-18	Ex-3	Fam189a1
Syt2	3.34729e-22	0.805633	0.671	0.323	7.72421e-18	Ex-3	Syt2
Hecw1	1.34834e-21	0.53078	0.934	0.761	3.11142e-17	Ex-3	Hecw1
Hs3st4	2.24007e-21	1.30367	0.752	0.49	5.16919e-17	Ex-3	Hs3st4
Cabp1	4.25899e-21	0.621153	0.649	0.265	9.82805e-17	Ex-3	Cabp1
Frmpd3	8.5716e-21	0.539563	0.571	0.155	1.97798e-16	Ex-3	Frmpd3
Kcnq3	8.61419e-21	0.568158	0.957	0.735	1.98781e-16	Ex-3	Kcnq3
Cntn3	1.1778e-20	0.956022	0.68	0.303	2.71789e-16	Ex-3	Cntn3
Zmiz1	1.19536e-20	0.542073	0.639	0.232	2.75841e-16	Ex-3	Zmiz1
Sema5b	2.51133e-20	0.603707	0.441	0.039	5.79514e-16	Ex-3	Sema5b
Pde8b	2.73375e-20	0.559568	0.795	0.439	6.30841e-16	Ex-3	Pde8b
Zbtb7c	4.78164e-20	0.783867	0.396	0	1.10341e-15	Ex-3	Zbtb7c
Fam19a2	6.09467e-20	0.71576	0.862	0.516	1.40641e-15	Ex-3	Fam19a2
Med12l	7.44584e-20	0.520004	0.901	0.684	1.7182e-15	Ex-3	Med12l
Adcy8	1.04023e-19	0.597011	0.832	0.49	2.40043e-15	Ex-3	Adcy8
Plxna2	1.09827e-19	0.519998	0.554	0.148	2.53438e-15	Ex-3	Plxna2
Cntnap5a	1.5758e-19	0.68985	0.973	0.755	3.63632e-15	Ex-3	Cntnap5a
Gm30382	2.63996e-19	0.75542	0.55	0.135	6.09198e-15	Ex-3	Gm30382
Ntm	4.42779e-19	0.561861	0.992	0.987	1.02176e-14	Ex-3	Ntm
Slit3	6.30383e-19	0.969841	0.536	0.148	1.45467e-14	Ex-3	Slit3
Maf	9.6175e-19	0.734017	0.446	0.065	2.21933e-14	Ex-3	Maf
Gabrb2	1.02965e-18	0.554408	0.928	0.71	2.37602e-14	Ex-3	Gabrb2
Rasgef1b	1.78785e-18	0.626513	0.772	0.445	4.12564e-14	Ex-3	Rasgef1b
Arpp21	2.80139e-18	0.604845	0.973	0.845	6.46449e-14	Ex-3	Arpp21
Pcdh9	4.44268e-18	0.566679	0.988	0.897	1.02519e-13	Ex-3	Pcdh9
Clvs1	5.08443e-18	0.511686	0.795	0.497	1.17328e-13	Ex-3	Clvs1
Lrrtm3	6.87967e-18	0.577482	0.93	0.845	1.58755e-13	Ex-3	Lrrtm3
Rhbdl3	1.03408e-17	0.574863	0.684	0.348	2.38624e-13	Ex-3	Rhbdl3
Galnt16	1.14559e-17	0.520256	0.632	0.277	2.64357e-13	Ex-3	Galnt16
Hap1	1.53429e-17	0.590342	0.571	0.219	3.54052e-13	Ex-3	Hap1
Arhgap26	3.31112e-17	0.64173	0.895	0.723	7.64075e-13	Ex-3	Arhgap26
Slc9a9	4.55797e-17	0.584742	0.708	0.419	1.0518e-12	Ex-3	Slc9a9
Gm32647	7.41483e-17	1.3258	0.505	0.148	1.71105e-12	Ex-3	Gm32647
Plcxd3	1.86318e-16	0.703726	0.583	0.232	4.29947e-12	Ex-3	Plcxd3
Sdk1	1.88637e-16	0.775517	0.507	0.135	4.35299e-12	Ex-3	Sdk1
Sparcl1	2.97085e-16	0.578273	0.624	0.348	6.85553e-12	Ex-3	Sparcl1
Gria3	8.27323e-16	0.579951	0.899	0.761	1.90913e-11	Ex-3	Gria3
Foxp2	1.32325e-15	1.14379	0.491	0.174	3.05352e-11	Ex-3	Foxp2
Nwd2	2.17017e-15	0.58391	0.413	0.071	5.00789e-11	Ex-3	Nwd2
Luzp2	2.373e-15	0.847081	0.719	0.51	5.47593e-11	Ex-3	Luzp2
2700069I18Rik	1.10269e-14	0.548665	0.534	0.213	2.54458e-10	Ex-3	2700069I18Rik
Nrgn	1.386e-14	0.758128	0.618	0.297	3.19833e-10	Ex-3	Nrgn
Gria1	2.29185e-14	0.615809	0.871	0.774	5.28867e-10	Ex-3	Gria1
Npas3	8.53835e-14	0.536156	0.573	0.245	1.97031e-09	Ex-3	Npas3
Kcna1	1.20598e-13	0.503884	0.608	0.361	2.78292e-09	Ex-3	Kcna1
Slc4a4	1.83727e-13	0.562519	0.54	0.232	4.23969e-09	Ex-3	Slc4a4
Stxbp6	2.53487e-13	0.544128	0.6	0.271	5.84946e-09	Ex-3	Stxbp6
Vwc2l	2.6994e-12	0.646986	0.351	0.065	6.22914e-08	Ex-3	Vwc2l
Inpp4b	4.5789e-12	0.572549	0.918	0.819	1.05663e-07	Ex-3	Inpp4b
Trps1	5.94668e-12	0.666893	0.595	0.342	1.37226e-07	Ex-3	Trps1
Ptprk	8.72574e-12	0.644458	0.524	0.239	2.01355e-07	Ex-3	Ptprk
Rgs6	9.06069e-12	0.742711	0.83	0.723	2.09084e-07	Ex-3	Rgs6
Ebf1	1.34874e-11	0.822752	0.343	0.065	3.11236e-07	Ex-3	Ebf1
Zfp804b	5.18373e-11	0.907944	0.544	0.303	1.1962e-06	Ex-3	Zfp804b
Slit2	5.46411e-09	0.521813	0.493	0.258	0.00012609	Ex-3	Slit2
Ptprt	1.10331e-08	0.597113	0.682	0.471	0.0002546	Ex-3	Ptprt
Sst	2.14861e-07	0.501065	0.246	0.065	0.00495813	Ex-3	Sst
Tac1	5.82791e-07	0.821466	0.253	0.077	0.0134485	Ex-3	Tac1
Adarb2	7.46801e-07	0.658606	0.429	0.245	0.0172332	Ex-3	Adarb2
Gpc5	5.33589e-05	0.68523	0.536	0.419	1	Ex-3	Gpc5
Il1rapl2	0.000236871	0.806108	0.415	0.303	1	Ex-3	Il1rapl2
Erbb4	0.00303217	0.767939	0.542	0.516	1	Ex-3	Erbb4
AC129186.1	3.24907e-101	1.94285	0.884	0.053	7.49755e-97	Ex-6	AC129186.1
Tmem132c	8.75151e-89	1.96568	1	0.261	2.0195e-84	Ex-6	Tmem132c
Scml2	8.69105e-77	0.876888	0.677	0.023	2.00555e-72	Ex-6	Scml2
Lef1	1.14018e-76	1.0821	0.845	0.101	2.63108e-72	Ex-6	Lef1
Kcnd3	1.42442e-76	2.26406	0.987	0.604	3.287e-72	Ex-6	Kcnd3
Tmem132cos	4.3984e-76	1.26351	0.897	0.15	1.01497e-71	Ex-6	Tmem132cos
Gpc3	2.01516e-75	1.37551	0.781	0.078	4.65018e-71	Ex-6	Gpc3
Grik1	7.0321e-73	2.07462	0.955	0.302	1.62273e-68	Ex-6	Grik1
Kcnip4	1.57963e-67	1.45516	1	0.934	3.64515e-63	Ex-6	Kcnip4
Cacna1d	7.44364e-66	1.48309	0.994	0.994	1.71769e-61	Ex-6	Cacna1d
Lhfp	1.4331e-65	1.28751	0.923	0.24	3.30701e-61	Ex-6	Lhfp
D130079A08Rik	4.02068e-64	1.27436	0.768	0.107	9.27813e-60	Ex-6	D130079A08Rik
Necab1	6.12378e-64	1.20466	0.903	0.246	1.41312e-59	Ex-6	Necab1
Grm8	3.82749e-63	1.49285	1	0.587	8.83232e-59	Ex-6	Grm8
Prex2	5.72703e-63	1.64635	0.845	0.222	1.32157e-58	Ex-6	Prex2
Tmem108	5.96424e-63	1.60062	0.974	0.797	1.37631e-58	Ex-6	Tmem108
Egflam	6.73843e-62	0.897835	0.677	0.066	1.55496e-57	Ex-6	Egflam
A630012P03Rik	3.88175e-61	0.953019	0.613	0.039	8.95753e-57	Ex-6	A630012P03Rik
Elmod1	1.51421e-59	1.13918	0.981	0.86	3.4942e-55	Ex-6	Elmod1
Egfem1	3.9675e-59	1.65717	0.974	0.456	9.15539e-55	Ex-6	Egfem1
Nav2	7.87267e-59	0.94393	0.987	0.986	1.8167e-54	Ex-6	Nav2
Atrnl1	8.53894e-59	1.25847	0.961	0.834	1.97045e-54	Ex-6	Atrnl1
Ttc28	2.96263e-58	1.16871	0.961	0.803	6.83656e-54	Ex-6	Ttc28
Hcn1	1.70342e-57	1.39814	0.987	0.793	3.93082e-53	Ex-6	Hcn1
Grm1	2.52237e-57	1.39853	0.961	0.554	5.82061e-53	Ex-6	Grm1
Fam19a1	4.02082e-56	1.49032	0.987	0.651	9.27844e-52	Ex-6	Fam19a1
Scn3a	5.25224e-56	1.2249	0.948	0.661	1.21201e-51	Ex-6	Scn3a
Cacnb2	4.61266e-54	1.31677	0.987	0.951	1.06442e-49	Ex-6	Cacnb2
Adamtsl1	5.899e-54	1.45286	0.89	0.261	1.36125e-49	Ex-6	Adamtsl1
Cdh13	1.00409e-53	1.334	0.974	0.807	2.31704e-49	Ex-6	Cdh13
Dgkh	3.71652e-53	1.17824	0.955	0.743	8.57623e-49	Ex-6	Dgkh
Npnt	2.03146e-52	1.02545	0.806	0.209	4.68781e-48	Ex-6	Npnt
Wls	2.31735e-51	0.95004	0.755	0.154	5.34751e-47	Ex-6	Wls
Gm10848	5.64781e-51	0.8361	0.658	0.099	1.30329e-46	Ex-6	Gm10848
Ripor2	1.83799e-50	0.977231	0.948	0.55	4.24134e-46	Ex-6	Ripor2
Tpd52l1	2.89275e-50	1.02377	0.852	0.312	6.67532e-46	Ex-6	Tpd52l1
Dpp6	1.05059e-49	1.03767	1	0.998	2.42435e-45	Ex-6	Dpp6
B3glct	1.08021e-48	0.719617	0.755	0.164	2.4927e-44	Ex-6	B3glct
Pde3a	1.88278e-48	1.03223	0.768	0.175	4.34469e-44	Ex-6	Pde3a
Dach1	3.47091e-47	1.22921	0.729	0.162	8.00948e-43	Ex-6	Dach1
Kcnb2	3.78438e-47	1.29504	0.961	0.914	8.73284e-43	Ex-6	Kcnb2
Maml2	1.58363e-46	0.975585	0.839	0.255	3.6544e-42	Ex-6	Maml2
Gda	1.6523e-46	1.07057	0.748	0.203	3.81284e-42	Ex-6	Gda
Rora	2.32495e-46	0.695624	0.987	0.998	5.36504e-42	Ex-6	Rora
Mgll	2.40046e-46	0.86689	0.884	0.32	5.53929e-42	Ex-6	Mgll
Fgf13	2.45544e-46	1.15105	0.961	0.743	5.66617e-42	Ex-6	Fgf13
Sgk3	5.0858e-46	0.742669	0.69	0.136	1.1736e-41	Ex-6	Sgk3
Robo2	2.67196e-45	0.957065	0.994	0.897	6.16581e-41	Ex-6	Robo2
C130073E24Rik	6.08263e-45	1.61671	0.974	0.811	1.40363e-40	Ex-6	C130073E24Rik
Gm45323	7.66864e-45	1.30255	0.923	0.569	1.76962e-40	Ex-6	Gm45323
Pde4d	1.54473e-44	0.860957	0.987	0.943	3.56461e-40	Ex-6	Pde4d
4933413L06Rik	1.90591e-44	1.09005	0.884	0.39	4.39808e-40	Ex-6	4933413L06Rik
Pex5l	2.84614e-44	1.05916	0.994	0.895	6.56775e-40	Ex-6	Pex5l
Gm45321	3.07091e-44	1.49788	0.923	0.548	7.08643e-40	Ex-6	Gm45321
Lmo3	5.4881e-44	0.813895	0.755	0.183	1.26643e-39	Ex-6	Lmo3
Syne1	9.69844e-44	0.813468	0.981	0.959	2.23801e-39	Ex-6	Syne1
Nell1	1.06245e-43	1.14793	0.955	0.766	2.45171e-39	Ex-6	Nell1
Tnfrsf19	4.11742e-43	0.557354	0.574	0.076	9.50136e-39	Ex-6	Tnfrsf19
Trpc5	1.37449e-42	0.978381	0.935	0.507	3.17177e-38	Ex-6	Trpc5
Epha4	2.10116e-42	0.899941	0.91	0.511	4.84864e-38	Ex-6	Epha4
Tmtc1	3.04885e-42	0.752939	0.974	0.745	7.03553e-38	Ex-6	Tmtc1
4930555F03Rik	5.81721e-42	1.59335	0.942	0.694	1.34238e-37	Ex-6	4930555F03Rik
Meis2	3.96174e-41	0.889195	0.981	0.737	9.1421e-37	Ex-6	Meis2
Sntg2	1.42423e-40	0.794722	0.748	0.191	3.28654e-36	Ex-6	Sntg2
Gm2516	1.83288e-40	1.47624	0.884	0.585	4.22956e-36	Ex-6	Gm2516
Nyap2	1.01314e-39	0.829995	0.968	0.778	2.33791e-35	Ex-6	Nyap2
Cep112	1.87722e-39	1.09398	0.916	0.474	4.33188e-35	Ex-6	Cep112
Slc1a1	3.44572e-39	0.872853	0.903	0.559	7.95135e-35	Ex-6	Slc1a1
Pid1	1.1755e-38	0.877289	0.968	0.797	2.71259e-34	Ex-6	Pid1
Sox5os4	1.67955e-38	0.662847	0.465	0.047	3.87574e-34	Ex-6	Sox5os4
Gm45341	2.16319e-38	1.16322	0.832	0.359	4.99177e-34	Ex-6	Gm45341
Kcnc2	4.10619e-38	0.817218	0.981	0.934	9.47545e-34	Ex-6	Kcnc2
Cers6	8.22443e-38	0.756193	0.923	0.735	1.89787e-33	Ex-6	Cers6
Trhde	1.78578e-37	0.86418	0.91	0.45	4.12086e-33	Ex-6	Trhde
Galntl6	2.32118e-37	1.07542	1	0.93	5.35636e-33	Ex-6	Galntl6
Gm14582	8.03757e-37	0.542974	0.374	0.018	1.85475e-32	Ex-6	Gm14582
Adcy2	1.54263e-36	0.827316	0.968	0.614	3.55977e-32	Ex-6	Adcy2
Gm48094	2.41011e-36	0.836185	0.735	0.222	5.56158e-32	Ex-6	Gm48094
Zfp462	1.10047e-35	0.751971	0.961	0.885	2.53945e-31	Ex-6	Zfp462
Kctd16	4.67532e-34	0.740296	0.981	0.947	1.07888e-29	Ex-6	Kctd16
Sox5	1.35795e-33	1.27992	0.645	0.187	3.1336e-29	Ex-6	Sox5
Pbx3	1.80508e-33	0.870586	0.942	0.63	4.16539e-29	Ex-6	Pbx3
4930419G24Rik	4.3402e-33	0.804382	0.897	0.577	1.00154e-28	Ex-6	4930419G24Rik
Ptprz1	4.79062e-33	0.83867	0.871	0.46	1.10548e-28	Ex-6	Ptprz1
Asic2	5.22291e-33	0.682084	1	0.971	1.20524e-28	Ex-6	Asic2
Nrp2	7.25898e-33	0.609291	0.671	0.187	1.67508e-28	Ex-6	Nrp2
Fry	1.29872e-32	0.657627	0.974	0.94	2.99693e-28	Ex-6	Fry
Prkd1	1.5625e-32	0.942224	0.742	0.277	3.60562e-28	Ex-6	Prkd1
Zeb1	1.74796e-32	0.720188	0.968	0.914	4.03358e-28	Ex-6	Zeb1
Dock4	3.71126e-32	0.873274	0.948	0.77	8.5641e-28	Ex-6	Dock4
Tenm3	8.6651e-32	0.997589	0.981	0.93	1.99956e-27	Ex-6	Tenm3
Cplx2	1.51556e-31	0.745676	0.839	0.4	3.49732e-27	Ex-6	Cplx2
Col25a1	3.4919e-30	1.43385	0.729	0.331	8.0579e-26	Ex-6	Col25a1
Fmnl2	4.7287e-30	0.725029	0.948	0.842	1.0912e-25	Ex-6	Fmnl2
Gm13269	3.88255e-29	0.812624	0.794	0.38	8.95938e-25	Ex-6	Gm13269
Ptprd	4.48331e-29	0.639231	1	1	1.03457e-24	Ex-6	Ptprd
Lgr5	1.3838e-28	0.547282	0.555	0.136	3.19325e-24	Ex-6	Lgr5
Mgat4c	2.3976e-28	0.721921	0.987	0.869	5.53269e-24	Ex-6	Mgat4c
Tspoap1	2.6738e-28	0.661446	0.91	0.805	6.17005e-24	Ex-6	Tspoap1
Trpm3	3.67414e-28	0.635403	0.987	0.912	8.47844e-24	Ex-6	Trpm3
Grm7	7.25911e-28	0.515984	1	0.986	1.67511e-23	Ex-6	Grm7
1700025G04Rik	7.812e-28	0.709343	0.903	0.727	1.8027e-23	Ex-6	1700025G04Rik
Tmem132b	1.28039e-27	0.655631	0.942	0.729	2.95463e-23	Ex-6	Tmem132b
Arid1b	1.50004e-27	0.700606	0.955	0.838	3.46149e-23	Ex-6	Arid1b
Lrrc4c	2.76296e-27	0.596811	1	0.996	6.3758e-23	Ex-6	Lrrc4c
Cdk17	2.8015e-27	0.673001	0.903	0.622	6.46473e-23	Ex-6	Cdk17
Gm26905	3.56019e-27	0.86336	0.942	0.717	8.21549e-23	Ex-6	Gm26905
4930567K20Rik	4.14431e-27	0.645107	0.555	0.148	9.5634e-23	Ex-6	4930567K20Rik
Klhl5	6.79662e-27	0.57999	0.684	0.253	1.56839e-22	Ex-6	Klhl5
Gm28928	7.02879e-27	1.26483	0.845	0.538	1.62196e-22	Ex-6	Gm28928
Thsd7a	8.56266e-27	0.814063	0.929	0.786	1.97592e-22	Ex-6	Thsd7a
Ccdc85a	8.88014e-27	0.631499	0.987	0.932	2.04918e-22	Ex-6	Ccdc85a
Atp2b1	1.14546e-26	0.648759	0.942	0.869	2.64327e-22	Ex-6	Atp2b1
4430402I18Rik	1.20411e-26	0.784888	0.826	0.571	2.77861e-22	Ex-6	4430402I18Rik
Bcl11b	2.12332e-26	0.640565	0.916	0.536	4.89978e-22	Ex-6	Bcl11b
Kcnj6	2.92333e-26	0.646127	0.884	0.618	6.74587e-22	Ex-6	Kcnj6
Gabrb1	6.31916e-26	0.643707	0.987	0.924	1.45821e-21	Ex-6	Gabrb1
Syt1	2.02215e-25	0.500566	0.974	0.992	4.66631e-21	Ex-6	Syt1
Cntnap2	2.68105e-25	0.973315	1	1	6.18678e-21	Ex-6	Cntnap2
Dner	3.46608e-25	0.572877	0.923	0.778	7.99832e-21	Ex-6	Dner
Nxph1	8.16686e-25	0.732411	0.787	0.355	1.88458e-20	Ex-6	Nxph1
Chst9	9.54323e-25	0.715873	0.406	0.076	2.2022e-20	Ex-6	Chst9
Gm37459	1.27795e-24	0.582258	0.768	0.382	2.94899e-20	Ex-6	Gm37459
Osbpl3	1.58776e-24	0.545673	0.735	0.302	3.66392e-20	Ex-6	Osbpl3
Camk2d	4.98102e-24	0.55999	0.955	0.926	1.14942e-19	Ex-6	Camk2d
Zfp536	6.52596e-24	0.84194	0.626	0.244	1.50593e-19	Ex-6	Zfp536
Plcb1	8.07968e-24	0.721815	0.974	0.877	1.86447e-19	Ex-6	Plcb1
Ptprg	1.15609e-23	0.753557	0.994	0.901	2.6678e-19	Ex-6	Ptprg
St6galnac3	1.40379e-22	0.53568	0.768	0.347	3.23938e-18	Ex-6	St6galnac3
Cdh8	1.91597e-22	0.829409	0.91	0.663	4.42129e-18	Ex-6	Cdh8
Prkg1	3.5469e-22	0.768145	0.981	0.91	8.18483e-18	Ex-6	Prkg1
Shisa9	7.97355e-22	0.846048	0.91	0.77	1.83998e-17	Ex-6	Shisa9
Satb1	1.10862e-21	0.514502	0.555	0.183	2.55825e-17	Ex-6	Satb1
Chsy3	1.518e-21	0.74346	0.89	0.721	3.50293e-17	Ex-6	Chsy3
Kcnn2	7.21921e-21	0.559774	0.91	0.696	1.66591e-16	Ex-6	Kcnn2
Gabbr2	7.4843e-21	0.528154	0.968	0.86	1.72708e-16	Ex-6	Gabbr2
Pdzd2	1.81938e-20	0.515366	0.755	0.384	4.19839e-16	Ex-6	Pdzd2
Tshz2	2.50116e-20	0.640447	0.929	0.585	5.77168e-16	Ex-6	Tshz2
Tenm2	2.74357e-20	0.566981	1	0.996	6.33105e-16	Ex-6	Tenm2
Rgs7	1.07377e-19	0.586	0.981	0.969	2.47783e-15	Ex-6	Rgs7
Cdh2	1.57e-19	0.5874	0.942	0.869	3.62293e-15	Ex-6	Cdh2
Rtl4	1.84297e-19	0.661348	0.877	0.626	4.25283e-15	Ex-6	Rtl4
Cachd1	3.23634e-19	0.578512	0.845	0.608	7.46817e-15	Ex-6	Cachd1
Kctd8	5.15469e-19	0.593463	0.974	0.764	1.1895e-14	Ex-6	Kctd8
A830018L16Rik	9.24432e-19	0.568857	0.955	0.702	2.13322e-14	Ex-6	A830018L16Rik
Plcb4	1.84817e-18	0.715905	0.935	0.887	4.26484e-14	Ex-6	Plcb4
Cntnap4	7.54854e-18	0.544847	0.832	0.534	1.7419e-13	Ex-6	Cntnap4
Fhod3	1.15183e-17	0.57237	0.903	0.762	2.65797e-13	Ex-6	Fhod3
Zmat4	1.66805e-17	0.722412	0.748	0.464	3.84918e-13	Ex-6	Zmat4
Ncald	2.18092e-17	0.534743	0.929	0.768	5.03268e-13	Ex-6	Ncald
Ldlrad4	1.38299e-16	0.514192	0.871	0.708	3.19138e-12	Ex-6	Ldlrad4
Cacna2d3	5.38377e-16	0.574709	0.903	0.694	1.24236e-11	Ex-6	Cacna2d3
Gm26883	5.69587e-16	0.541199	0.794	0.454	1.31438e-11	Ex-6	Gm26883
Gulp1	6.367e-14	0.606677	0.652	0.372	1.46925e-09	Ex-6	Gulp1
Alk	7.01478e-14	0.659897	0.806	0.567	1.61873e-09	Ex-6	Alk
A330008L17Rik	7.9965e-14	0.575025	0.69	0.382	1.84527e-09	Ex-6	A330008L17Rik
Nkain3	1.04583e-12	0.532656	0.884	0.688	2.41335e-08	Ex-6	Nkain3

## Sheet: DEGs_between_Ex1_and_Ex4
Table S5: Differentially expressed genes between excitatory neuron subtype Ex-1 and Ex-4
	p_val	avg_logFC	pct.1	pct.2	p_val_adj	cluster	gene
Tshz2	7.72378e-89	1.78259	0.958	0.559	1.78234e-84	Ex-1	Tshz2
Robo2	5.80907e-80	1.26801	0.978	0.614	1.3405e-75	Ex-1	Robo2
Tfap2b	2.77178e-76	1.21766	0.779	0.024	6.39615e-72	Ex-1	Tfap2b
Gm26883	5.17733e-74	1.48948	0.899	0.394	1.19472e-69	Ex-1	Gm26883
Unc5d	1.79134e-71	1.26149	0.976	0.642	4.13371e-67	Ex-1	Unc5d
Car10	1.79566e-65	1.21331	0.969	0.484	4.14367e-61	Ex-1	Car10
Kcnd2	1.55863e-56	0.839395	0.995	0.976	3.5967e-52	Ex-1	Kcnd2
Ptprt	3.17742e-56	1.35452	0.852	0.35	7.33221e-52	Ex-1	Ptprt
Kcnip4	9.21744e-56	2.07252	0.927	0.701	2.12702e-51	Ex-1	Kcnip4
Cntn4	1.48671e-53	1.24855	0.901	0.547	3.43074e-49	Ex-1	Cntn4
D430041D05Rik	1.47936e-52	0.878856	0.883	0.575	3.41378e-48	Ex-1	D430041D05Rik
Camk2d	4.98162e-49	0.806258	0.932	0.768	1.14956e-44	Ex-1	Camk2d
Pcsk2	2.26007e-48	0.853088	0.969	0.78	5.21533e-44	Ex-1	Pcsk2
Auts2	6.42977e-47	1.17211	0.89	0.606	1.48373e-42	Ex-1	Auts2
Fam19a2	8.33973e-47	0.756463	0.995	0.866	1.92448e-42	Ex-1	Fam19a2
Tenm4	9.48366e-46	0.733239	0.985	0.89	2.18845e-41	Ex-1	Tenm4
Nebl	9.29549e-45	0.75247	0.909	0.622	2.14503e-40	Ex-1	Nebl
Stxbp6	4.18049e-43	0.992957	0.691	0.201	9.6469e-39	Ex-1	Stxbp6
Mdga1	1.63764e-40	0.707749	0.547	0.043	3.77902e-36	Ex-1	Mdga1
AC129186.1	1.97059e-40	1.01643	0.651	0.169	4.54733e-36	Ex-1	AC129186.1
Grm8	5.13694e-39	1.04666	0.819	0.48	1.1854e-34	Ex-1	Grm8
Hcn1	9.67833e-38	0.883451	0.775	0.374	2.23337e-33	Ex-1	Hcn1
Reln	1.79257e-37	1.0781	0.543	0.075	4.13653e-33	Ex-1	Reln
Dlgap1	4.01178e-36	0.567922	0.989	0.957	9.25758e-32	Ex-1	Dlgap1
Hs6st3	8.70115e-36	1.15964	0.761	0.382	2.00788e-31	Ex-1	Hs6st3
Ppp3ca	2.81102e-35	0.544117	0.984	0.917	6.48671e-31	Ex-1	Ppp3ca
Kctd16	1.92834e-34	0.870685	0.856	0.626	4.44985e-30	Ex-1	Kctd16
Grin3a	1.07974e-33	0.768833	0.797	0.449	2.49161e-29	Ex-1	Grin3a
BC030499	2.8492e-33	0.725377	0.585	0.161	6.57481e-29	Ex-1	BC030499
Rbfox1	3.55795e-33	0.570621	1	0.953	8.21033e-29	Ex-1	Rbfox1
Asic2	1.13254e-32	0.645928	0.974	0.969	2.61345e-28	Ex-1	Asic2
D030068K23Rik	2.03557e-32	0.668719	0.495	0.063	4.69729e-28	Ex-1	D030068K23Rik
B230323A14Rik	2.04499e-32	0.72764	0.439	0.016	4.71902e-28	Ex-1	B230323A14Rik
Cacna2d1	2.67731e-32	0.515603	1	0.988	6.17815e-28	Ex-1	Cacna2d1
Nos1ap	1.98644e-31	0.739917	0.762	0.461	4.58392e-27	Ex-1	Nos1ap
Tshz3	6.69305e-31	0.715333	0.578	0.185	1.54449e-26	Ex-1	Tshz3
Hgf	1.14214e-30	0.621655	0.411	0.012	2.63561e-26	Ex-1	Hgf
D130079A08Rik	1.97691e-30	0.890929	0.411	0.012	4.56192e-26	Ex-1	D130079A08Rik
Pex5l	2.1129e-30	0.934011	0.761	0.461	4.87573e-26	Ex-1	Pex5l
2600014E21Rik	2.49967e-30	0.839217	0.402	0.008	5.76824e-26	Ex-1	2600014E21Rik
Cntn5	2.57649e-30	0.68572	0.971	0.839	5.94551e-26	Ex-1	Cntn5
Arhgap15	4.52969e-30	0.737376	0.49	0.091	1.04527e-25	Ex-1	Arhgap15
Sox6	1.39662e-29	1.18267	0.466	0.075	3.22285e-25	Ex-1	Sox6
Dock4	1.20659e-28	0.653431	0.914	0.78	2.78432e-24	Ex-1	Dock4
Ebf1	2.48823e-28	0.831602	0.881	0.701	5.74184e-24	Ex-1	Ebf1
Cadps2	3.99337e-28	0.844733	0.503	0.13	9.2151e-24	Ex-1	Cadps2
Aff3	1.00019e-27	0.536679	0.867	0.72	2.30804e-23	Ex-1	Aff3
Rsrc1	1.02672e-27	0.548051	0.85	0.657	2.36925e-23	Ex-1	Rsrc1
Tspan5	1.68758e-27	0.590638	0.777	0.488	3.89425e-23	Ex-1	Tspan5
C130071C03Rik	5.29428e-27	0.535543	0.806	0.594	1.22171e-22	Ex-1	C130071C03Rik
Ldb2	7.91123e-27	0.767123	0.779	0.5	1.8256e-22	Ex-1	Ldb2
Gm3764	2.62566e-26	0.50369	0.444	0.075	6.05897e-22	Ex-1	Gm3764
L3mbtl4	1.86266e-25	0.796557	0.448	0.087	4.29827e-21	Ex-1	L3mbtl4
Pde3a	2.94724e-25	0.832988	0.525	0.169	6.80104e-21	Ex-1	Pde3a
Shisa9	2.0133e-24	0.58122	0.852	0.598	4.6459e-20	Ex-1	Shisa9
Stac2	3.51327e-24	0.512672	0.503	0.138	8.10721e-20	Ex-1	Stac2
Kirrel3	4.11602e-24	0.717113	0.835	0.587	9.49813e-20	Ex-1	Kirrel3
Plce1	1.13918e-23	0.73369	0.358	0.031	2.62878e-19	Ex-1	Plce1
Akap13	1.65306e-23	0.545813	0.569	0.22	3.81461e-19	Ex-1	Akap13
Etv1	7.17817e-23	0.947127	0.366	0.043	1.65643e-18	Ex-1	Etv1
Zfp536	1.48422e-22	0.645131	0.422	0.087	3.42498e-18	Ex-1	Zfp536
Erbb4	1.49452e-22	0.920658	0.768	0.512	3.44876e-18	Ex-1	Erbb4
Utrn	4.00901e-22	0.567021	0.466	0.126	9.2512e-18	Ex-1	Utrn
Kcnh7	4.90507e-22	0.540715	0.973	0.953	1.13189e-17	Ex-1	Kcnh7
Tcf4	7.92893e-22	0.726704	0.614	0.354	1.82968e-17	Ex-1	Tcf4
Dapk1	6.51175e-21	0.545563	0.695	0.406	1.50265e-16	Ex-1	Dapk1
Foxp2	1.10035e-20	0.939638	0.505	0.217	2.53916e-16	Ex-1	Foxp2
Cdh13	1.54521e-20	0.548575	0.905	0.791	3.56572e-16	Ex-1	Cdh13
Slit2	1.55964e-20	0.681831	0.495	0.169	3.59902e-16	Ex-1	Slit2
Gpc6	1.15564e-19	0.758433	0.647	0.378	2.66675e-15	Ex-1	Gpc6
Col25a1	1.18584e-19	0.76961	0.695	0.406	2.73644e-15	Ex-1	Col25a1
Slc35f1	1.42566e-19	0.546479	0.949	0.945	3.28985e-15	Ex-1	Slc35f1
Luzp2	9.42223e-18	0.665739	0.729	0.535	2.17427e-13	Ex-1	Luzp2
Cdh6	4.50921e-17	0.552361	0.393	0.11	1.04055e-12	Ex-1	Cdh6
Plcb1	3.09286e-16	0.530254	0.883	0.803	7.13709e-12	Ex-1	Plcb1
Syt2	1.17948e-15	0.502877	0.486	0.22	2.72177e-11	Ex-1	Syt2
Ano3	3.42925e-15	0.516672	0.594	0.378	7.91334e-11	Ex-1	Ano3
Megf11	4.4879e-15	0.693653	0.426	0.173	1.03563e-10	Ex-1	Megf11
Nell1	4.70212e-15	0.63495	0.792	0.677	1.08506e-10	Ex-1	Nell1
Slit3	1.21742e-14	0.615565	0.263	0.035	2.80932e-10	Ex-1	Slit3
Zmat4	4.68959e-13	0.511306	0.598	0.358	1.08217e-08	Ex-1	Zmat4
Adarb2	8.5815e-13	0.956247	0.439	0.224	1.98027e-08	Ex-1	Adarb2
Dach1	2.78892e-12	0.767938	0.477	0.272	6.4357e-08	Ex-1	Dach1
Pdzrn4	3.183e-12	0.51629	0.812	0.748	7.34509e-08	Ex-1	Pdzrn4
D130009I18Rik	4.41275e-11	0.537779	0.446	0.224	1.01829e-06	Ex-1	D130009I18Rik
Alcam	6.08376e-11	0.509445	0.744	0.61	1.40389e-06	Ex-1	Alcam
Tenm3	6.13939e-09	0.527911	0.941	0.909	0.000141673	Ex-1	Tenm3
Fbxl7	7.44952e-09	0.517017	0.336	0.161	0.000171905	Ex-1	Fbxl7
Alk	9.64551e-08	0.573325	0.784	0.74	0.0022258	Ex-1	Alk
Nxph1	1.19245e-07	0.512267	0.371	0.201	0.0027517	Ex-1	Nxph1
Zfpm2	7.18507e-06	0.586349	0.375	0.26	0.165803	Ex-1	Zfpm2
Il1rapl2	1.16987e-05	0.936503	0.298	0.185	0.269959	Ex-1	Il1rapl2
Gli3	7.22594e-134	1.47624	0.882	0.026	1.66746e-129	Ex-4	Gli3
Hs3st4	1.21002e-113	1.90875	0.992	0.325	2.79223e-109	Ex-4	Hs3st4
Htr2c	5.56995e-102	1.66909	0.949	0.263	1.28532e-97	Ex-4	Htr2c
Pitx2	1.37232e-98	0.800949	0.665	0.004	3.16677e-94	Ex-4	Pitx2
Chrm2	7.87425e-94	1.40002	0.969	0.274	1.81706e-89	Ex-4	Chrm2
Bnc2	1.15552e-93	1.1118	0.76	0.059	2.66648e-89	Ex-4	Bnc2
Pcdh11x	6.22747e-75	1.09631	0.969	0.4	1.43705e-70	Ex-4	Pcdh11x
Foxp4	9.08134e-71	0.840737	0.646	0.068	2.09561e-66	Ex-4	Foxp4
Pmfbp1	4.18418e-69	0.63171	0.524	0.015	9.6554e-65	Ex-4	Pmfbp1
9330158H04Rik	2.8255e-68	0.783753	0.591	0.046	6.52012e-64	Ex-4	9330158H04Rik
Pcdh15	1.09709e-66	1.13067	0.992	0.658	2.53164e-62	Ex-4	Pcdh15
Gm43824	1.26673e-59	0.829704	0.535	0.044	2.92311e-55	Ex-4	Gm43824
Syt17	2.35923e-57	0.593027	0.433	0.007	5.44415e-53	Ex-4	Syt17
Gm15398	3.46797e-56	0.924505	0.866	0.298	8.0027e-52	Ex-4	Gm15398
Olfm3	3.44749e-54	0.930539	0.953	0.616	7.95542e-50	Ex-4	Olfm3
Grik3	5.68269e-54	0.701271	0.819	0.234	1.31134e-49	Ex-4	Grik3
Elavl2	1.684e-50	0.819958	0.925	0.556	3.886e-46	Ex-4	Elavl2
Plcb4	2.69518e-50	0.697259	0.988	0.912	6.21939e-46	Ex-4	Plcb4
Npas3	8.92855e-50	1.11387	0.941	0.537	2.06035e-45	Ex-4	Npas3
Pbx1	9.49215e-50	0.669831	1	0.958	2.19041e-45	Ex-4	Pbx1
Gsg1l	5.86088e-48	0.593641	0.654	0.144	1.35246e-43	Ex-4	Gsg1l
Grik1	1.25993e-46	0.849623	0.937	0.495	2.90742e-42	Ex-4	Grik1
Dcc	4.41862e-42	0.598642	1	0.956	1.01964e-37	Ex-4	Dcc
Cdh8	1.07195e-41	0.665115	1	0.801	2.47364e-37	Ex-4	Cdh8
A330008L17Rik	1.52507e-41	0.788888	0.949	0.537	3.51925e-37	Ex-4	A330008L17Rik
Sox5	1.29881e-40	0.645939	0.409	0.044	2.99713e-36	Ex-4	Sox5
Brinp3	6.16988e-40	0.719716	0.972	0.691	1.42376e-35	Ex-4	Brinp3
Col11a1	5.92595e-39	0.646996	0.591	0.15	1.36747e-34	Ex-4	Col11a1
Lncenc1	7.07208e-37	0.550478	0.638	0.176	1.63195e-32	Ex-4	Lncenc1
Fam19a1	1.47418e-35	0.613739	0.996	0.861	3.40182e-31	Ex-4	Fam19a1
Slc6a1	1.30674e-34	0.595806	0.823	0.397	3.01544e-30	Ex-4	Slc6a1
4930447C04Rik	1.70543e-34	0.505585	0.571	0.15	3.93544e-30	Ex-4	4930447C04Rik
Fstl5	6.93633e-32	0.656328	0.961	0.762	1.60063e-27	Ex-4	Fstl5
Plxna4	2.46389e-31	0.510465	0.992	0.835	5.68568e-27	Ex-4	Plxna4
Spock1	8.03441e-31	0.590254	0.882	0.472	1.85402e-26	Ex-4	Spock1
Cacna1d	2.39652e-30	0.576444	0.992	0.949	5.53022e-26	Ex-4	Cacna1d
Opcml	5.54705e-30	0.525823	1	0.914	1.28004e-25	Ex-4	Opcml
Plcxd3	4.16014e-29	0.622281	0.835	0.473	9.59994e-25	Ex-4	Plcxd3
Tmem163	7.68294e-29	0.50699	0.949	0.609	1.77292e-24	Ex-4	Tmem163
Cck	5.3371e-27	0.6282	0.417	0.104	1.23159e-22	Ex-4	Cck
Vwc2	1.44185e-24	0.504754	0.862	0.528	3.32722e-20	Ex-4	Vwc2
Grik2	2.03192e-22	0.591563	0.976	0.976	4.68886e-18	Ex-4	Grik2
Trhde	8.35854e-21	0.512104	0.677	0.346	1.92882e-16	Ex-4	Trhde
Meis2	1.92757e-20	0.548719	0.65	0.305	4.44806e-16	Ex-4	Meis2
Slc35f4	4.53202e-20	0.632247	0.823	0.625	1.04581e-15	Ex-4	Slc35f4
Cdh18	5.33338e-19	0.623098	0.882	0.629	1.23073e-14	Ex-4	Cdh18
Zfhx3	1.91784e-16	0.735208	0.673	0.424	4.42561e-12	Ex-4	Zfhx3
Sorcs3	7.91126e-07	0.532412	0.606	0.488	0.018256	Ex-4	Sorcs3
