# Supplementary material for: Transcriptomic encoding of sensorimotor transformation in the midbrain
Source: eLife. 2021 Jul 28;10:e69825. doi: 10.7554/eLife.69825 (PMC8341986; doi:10.7554/eLife.69825)
Supplement: Supplementary file 6. [file elife-69825-supp6.xlsx]

## Sheet: Table 1
Table S6. Summary of all experimental designs
Figures	Aims	Mouse lines	AAV injection & optical fiber implantation	Type of data
Figure 1 Figure1-S1	10x Single-cell RNA Seq of SC cells	WT	No AAV injection. No optical fiber implantation	Single-cell transcriptomics
Figure 2, A-C	Sparse labeling of SC projection neurons	vGlut2-IRES-Cre	Injection of AAV-DIO-EGFP into the SC	3-D single-cell projections
Figure 2, D-G Figure2-S1, A-E	Comparing electrophysiological properties of ZI- and LPTN-projecting SC neurons	vGlut2-IRES-Cre	Injection of AAV2-retro-DIO-EGFP into the ZI Injection of AAV2-retro-DIO-EGFP into the LPTN	Histology Slice physiology
Figure 2, H-N Figure 2-S1, F-H	Patch-seq of ZI- and LPTN-projecting SC neurons	vGlut2-IRES-Cre	Injection of AAV2-retro-DIO-EGFP into the ZI Injection of AAV2-retro-DIO-EGFP into the LPTN	Single-cell transcriptomics
Figure 3-S1, A-C	Generation of Cbln2-IRES-Cre mice	Cbln2-IRES-Cre	No AAV injection. No optical fiber implantation	DNA band & sequence
Figure 3A, 3B Figure 3S1, D	Validating specificity and efficiency of EGFP-labeled Cbln2+ SC neurons	Cbln2-IRES-Cre	Injection of AAV-DIO-EGFP into the SC	Histology
Figure 3, C-G Figure 3-S1, E-I	Functional role of Cbln2+ SC neurons in visually-evoked freezing & prey capture	Cbln2-IRES-Cre	Injection of AAV-DIO-EGFP-2A-TeNT and AAV-DIO-EGFP into the SC	Histology Behavior
Figure 3H, 3I Figure 3-S1, J	Validating specificity and efficiency of EGFP-labeled Pitx2+ SC neurons	Pitx2-Cre	Injection of AAV-DIO-EGFP into the SC	Histology
Figure 3, J-N Figure 3-S1, K-O	Functional role of Pitx2+ SC neurons in prey capture & visually-evoked freezing	Pitx2-Cre	Injection of AAV-DIO-EGFP-2A-TeNT and AAV-DIO-EGFP into the SC	Histology Behavior
Figure 4 Figure 4-S1	Recording of Cbln2+ and Pitx2+ SC neurons to visual and tactile stimuli	Cbln2-IRES-Cre Pitx2-Cre	Injection of AAV-DIO-GCaMP7 into the SC of Cbln2-IRES-Cre and Pitx2-Cre mice	Histology GCaMP signal
Figure 5 Figure 5-S1	Labeling monosynaptic inputs of Cbln2+ and Pitx2+ SC neurons	Cbln2-IRES-Cre Pitx2-Cre	Injection of AAV-helpers and RV into the SC of Cbln2-IRES-Cre and Pitx2-Cre mice	Histology
Figure 6 Figure 7	Labeling efferent projections of Cbln2+ and Pitx2+ SC neurons	Cbln2-IRES-Cre Pitx2-Cre	Injection of AAV-DIO-EGFP into the SC of Cbln2-IRES-Cre and Pitx2-Cre mice	Histology
Figure 8, A-D Figure 8-S1	Optogenetic activation of Cbln2+ SC-LPTN pathway	Cbln2-IRES-Cre	Injection of AAV-DIO-ChR2-mCherry into the SC of Cbln2-IRES-Cre mice, while implanting optical fiber above LPTN	Histology Behavior
Figure 8, E-J Figure 8-S1	Optogenetic activation of Pitx2+ SC-ZI pathway	Pitx2-Cre	Injection of AAV-DIO-ChR2-mCherry into the SC of Pitx2-Cre mice, while implanting optical fiber above ZI	Histology Behavior
