# Supplementary material for: Transcriptomic encoding of sensorimotor transformation in the midbrain
Source: eLife. 2021 Jul 28;10:e69825. doi: 10.7554/eLife.69825 (PMC8341986; doi:10.7554/eLife.69825)
Supplement: Supplementary file 7. [file elife-69825-supp7.xlsx]

## Sheet: Table 1
Table S7. Summary of cell-counting strategies
Brain region	Section Type	Section Range	Total collection	Sampling
M1/2	Coronal section (40 μm)	Bregma (2.46 to -1.34)	Approximately 95 sections	To sample all the sections
Cg1/2	Coronal section (40 μm)	Bregma (2.34 to -0.22)	Approximately 64 sections	To sample all the sections
S1	Coronal section (40 μm)	Bregma (1.98 to -2.30)	Approximately 107 sections	To sample all the sections
ZI	Coronal section (40 μm)	Bregma (-0.82 to -3.08)	Approximately 56 sections	To sample all the sections
SNr	Coronal section (40 μm)	Bregma (-2.54 to -3.88)	Approximately 33 sections	To sample all the sections
V1	Coronal section (40 μm)	Bregma (-2.18 to -5.20)	Approximately 75 sections	To sample all the sections
IC	Coronal section (40 μm)	Bregma (-4.16 to -5.34)	Approximately 30 sections	To sample all the sections
Pr5	Coronal section (40 μm)	Bregma (-4.84 to -5.68)	Approximately 21 sections	To sample all the sections
Sp5O	Coronal section (40 μm)	Bregma (-5.68 to -6.36)	Approximately 17 sections	To sample all the sections
PCRt	Coronal section (40 μm)	Bregma (-5.34 to -7.20)	Approximately 47 sections	To sample all the sections
Sp5I	Coronal section (40 μm)	Bregma (-6.48 to -7.64)	Approximately 29 sections	To sample all the sections
Sp5C	Coronal section (40 μm)	Bregma (-7.56 to -8.24)	Approximately 17 sections	To sample all the sections
