# Supplementary material for: Transcriptomic encoding of sensorimotor transformation in the midbrain
Source: eLife. 2021 Jul 28;10:e69825. doi: 10.7554/eLife.69825 (PMC8341986; doi:10.7554/eLife.69825)
Supplement: Supplementary file 8. [file elife-69825-supp8.xlsx]

## Sheet: Table 1
Table S8 Summary of statistical analyses
Figure	Sample size (n)	Statistical test	P values
3E	Ctrl = 7 mice	Student t-test	TeNT vs. Ctrl: P= 0.91201 n.s.
	TeNT = 7 mice
3F	Ctrl = 7 mice	Student t-test	TeNT vs. Ctrl: P= 7.543E-4 ***
	TeNT = 7 mice
3G	Ctrl = 7 mice	Student t-test	TeNT vs. Ctrl: P= 0.31465 n.s.
	TeNT = 7 mice
3L	Ctrl = 7 mice	Student t-test	TeNT vs. Ctrl: P= 4.4433E-5 ***
	TeNT = 7 mice
3M	Ctrl = 7 mice	Student t-test	TeNT vs. Ctrl: P= 2.44777E-4 ***
	TeNT = 7 mice
3N	Ctrl = 7 mice	Student t-test	TeNT vs. Ctrl: P= 1.24335E-5 ***
	TeNT = 7 mice
4K	Contralateral = 5 mice	One-Way ANOVA	Contraal vs. Ipsilateral: P=2.0145 E-7 ***
	Ipsilateral = 5 mice
5H	Retina-Cbln2 = 3 mice	Student t-test	Cbln2 vs. Pitx2: P= 3.657E-11 ***
	Retina-Pitx2 = 3 mice
	M1/2-Cbln2 = 3 mice	Student t-test	Cbln2 vs. Pitx2: P= 1.5478E-8 ***
	M1/2-Pitx2 = 3 mice
	Cg1/2-Cbln2 = 3 mice	Student t-test	Cbln2 vs. Pitx2: P= 2.3657E-8 ***
	Cg1/2-Pitx2 = 3 mice
	S1-Cbln2 = 3 mice	Student t-test	Cbln2 vs. Pitx2: P= 2.8774E-8 ***
	S1-Pitx2 = 3 mice
	ZI-Cbln2 = 3 mice	Student t-test	Cbln2 vs. Pitx2: P= 3.2154E-6 ***
	ZI-Pitx2 = 3 mice
	SNr-Cbln2 = 3 mice	Student t-test	Cbln2 vs. Pitx2: P= 6.5874E-6 ***
	SNr-Pitx2 = 3 mice
	V1-Cbln2 = 3 mice	Student t-test	Cbln2 vs. Pitx2: P= 2.9965E-7 ***
	V1-Pitx2 = 3 mice
	IC-Cbln2 = 3 mice	Student t-test	Cbln2 vs. Pitx2: P= 7.4125E-7 ***
	IC-Pitx2 = 3 mice
	PCRt-Cbln2 = 3 mice	Student t-test	Cbln2 vs. Pitx2: P= 2.8454E-7 ***
	PCRt-Pitx2 = 3 mice
	Pr5-Cbln2 = 3 mice	Student t-test	Cbln2 vs. Pitx2: P= 3.9657E-7 ***
	Pr5-Pitx2 = 3 mice
	Sp5O-Cbln2 = 3 mice	Student t-test	Cbln2 vs. Pitx2: P= 4.2587E-6 ***
	Sp5O-Pitx2 = 3 mice
	Sp5I-Cbln2= 3 mice	Student t-test	Cbln2 vs. Pitx2: P= 3.5547E-6 ***
	Sp5I-Pitx2 = 3 mice
	Sp5C-Cbln2= 3 mice	Student t-test	Cbln2 vs. Pitx2: P= 5.2142E-4 ***
	Sp5C-Pitx2 = 3 mice
7B	Cbln2+ = 3 mice	Student t-test	Cbln2+ vs. Pitx2+: P= 2.8547E-5 ***
	Pitx2+ = 3 mice
7D	Cbln2+ = 3 mice	Student t-test	Cbln2+ vs. Pitx2+: P= 4.8745E-5 ***
	Pitx2+ = 3 mice
8D	Before Ctrl = 6 mice	Student t-test	ChR2 vs. Ctrl: P= 0.68113 n.s.
	Before ChR2 = 6 mice
	During Ctrl = 6 mice	Student t-test	ChR2 vs. Ctrl: P= 0.00139 **
	During ChR2 = 6 mice
	After Ctrl = 6 mice	Student t-test	ChR2 vs. Ctrl: P= 0.01256 *
	After ChR2 = 6 mice
8H	OFF = 6 mice	Student t-test	ON vs. OFF: P= 0.00114 **
	ON = 6 mice
8I	OFF = 6 mice	Student t-test	ON vs. OFF: P= 3.73505E-4 ***
	ON = 6 mice
8J	OFF = 6 mice	Student t-test	ON vs. OFF: P= 0.00106 **
	ON = 6 mice
Figure 2-figure supplement 1B	LPTN = 24 cells	Student t-test	ZI vs. LPTN: P= 0.26047 n.s.
	ZI = 20 cells
Figure 2-figure supplement 1C	LPTN = 24 cells	Student t-test	ZI vs. LPTN: P= 0.60299 n.s.
	ZI = 20 cells
Figure 2-figure supplement 1E	LPTN = 24 cells	One-Way ANOVA	ZI vs. LPTN: P= 0.74243 n.s.
	ZI = 20 cells
Figure 3-figure supplement 1G	Ctrl = 7 mice	Student t-test	TeNT vs. Ctrl: P= 0.71578 n.s.
	TeNT = 7 mice
Figure 3-figure supplement 1H	Ctrl = 7 mice	Student t-test	TeNT vs. Ctrl: P= 0.67676 n.s.
	TeNT = 7 mice
Figure 3-figure supplement 1I	Ctrl = 7 mice	Student t-test	TeNT vs. Ctrl: P= 0.7171 n.s.
	TeNT = 7 mice
Figure 3-figure supplement 1M	Ctrl = 7 mice	Student t-test	TeNT vs. Ctrl: P= 0.7952 n.s.
	TeNT = 7 mice
Figure 3-figure supplement 1N	Ctrl = 7 mice	Student t-test	TeNT vs. Ctrl: P= 0.49495 n.s.
	TeNT = 7 mice
Figure 3-figure supplement 1O	Ctrl = 7 mice	Student t-test	TeNT vs. Ctrl: P= 0.50556 n.s.
	TeNT = 7 mice
Figure 8-figure supplement 1E	OFF = 6 mice	Student t-test	ON vs. OFF: P= 0.72106 n.s.
	ON = 6 mice
	OFF = 6 mice	Student t-test	ON vs. OFF: P= 0.90789 n.s.
	ON = 6 mice
	OFF = 6 mice	Student t-test	ON vs. OFF: P= 0.63291 n.s.
	ON = 6 mice
Figure 8-figure supplement 1G	Ctrl = 6 mice	Student t-test	ChR2 vs. Ctrl: P= 0.69416 n.s.
	ChR2 = 6 mice
	Ctrl = 6 mice	Student t-test	ChR2 vs. Ctrl: P= 0.92018 n.s.
	ChR2 = 6 mice
	Ctrl = 6 mice	Student t-test	ChR2 vs. Ctrl: P= 0.0.70269 n.s.
	ChR2 = 6 mice
